# Supplementary material for: Discovery and annotation of a novel transposable element family in Gossypium
Source: BMC Plant Biol. 2018 Nov 28;18:307. doi: 10.1186/s12870-018-1519-7 (PMC6264596; doi:10.1186/s12870-018-1519-7)
Supplement: Supplementary file 6 — Table S4. Distribution of CICR-LTR in different tetraploid genome assemblies. (XLSX 633 kb) [file 12870_2018_1519_MOESM6_ESM.xlsx]

## Sheet: S4-1
Table S4-1 Distribution of CICR-LTR in (AD)1-NBI.
Chr.	Start	End
A01	6860967	6859615
A01	7858704	7860058
A01	8496455	8497809
A01	8502215	8503568
A01	8523747	8522390
A01	8549220	8547857
A01	8730312	8729248
A01	8741564	8742930
A01	8853780	8854929
A01	8897270	8898636
A01	8926356	8925275
A01	8928678	8927314
A01	8936136	8934776
A01	8964023	8962676
A01	9275804	9277167
A01	9286327	9285061
A01	9294605	9293270
A01	10051914	10050849
A01	10070198	10071568
A01	10167065	10165704
A01	10191667	10190375
A01	10194952	10196278
A01	10202064	10203426
A01	10206224	10207312
A01	10213831	10212476
A01	10440540	10439173
A01	10441009	10442334
A01	10493381	10494499
A01	10519549	10520908
A01	10527809	10529179
A01	10530361	10531485
A01	10662571	10661218
A01	10801866	10803210
A01	10815426	10816785
A01	10928029	10926675
A01	10932465	10931126
A01	12570552	12569179
A01	12845939	12844570
A01	12854151	12852795
A01	12947396	12948748
A01	12973066	12974415
A01	12977055	12978409
A01	13008041	13009409
A01	13021531	13020164
A01	14067092	14065742
A01	14075396	14076464
A01	14089446	14088104
A01	14352081	14353439
A01	14360101	14361484
A01	14687366	14688725
A01	14693817	14695151
A01	14887163	14888495
A01	15050946	15049880
A01	15250754	15251825
A01	15258541	15259920
A01	15280343	15279229
A01	15292923	15291805
A01	15380912	15382285
A01	15391953	15393310
A01	15688198	15686848
A01	15709939	15708589
A01	15793656	15792291
A01	15800087	15798719
A01	16148443	16149810
A01	16153994	16152641
A01	16168386	16167035
A01	16981297	16982405
A01	16996932	16998047
A01	17050878	17052240
A01	17058772	17060141
A01	17281871	17280536
A01	17302418	17301102
A01	17304486	17303360
A01	17312023	17310793
A01	18024232	18025584
A01	18032585	18033934
A01	18547063	18548431
A01	18555231	18556586
A01	18796920	18795586
A01	20126749	20128099
A01	20131766	20133106
A01	20446737	20448090
A01	20450650	20452019
A01	20484998	20486353
A01	20496760	20498115
A01	22121786	22120434
A01	22130013	22128664
A01	22305239	22303871
A01	22313579	22312210
A01	22525213	22526566
A01	22532669	22534011
A01	22609849	22611230
A01	23100421	23099058
A01	23108704	23107339
A01	23276196	23277562
A01	23956955	23958323
A01	23969536	23970621
A01	24149093	24147758
A01	24159905	24158560
A01	24270699	24269625
A01	24357208	24358567
A01	24365429	24366772
A01	25023968	25022907
A01	25073517	25074860
A01	25081776	25083124
A01	25115172	25116236
A01	25784160	25785221
A01	25793116	25794198
A01	26443621	26444994
A01	26755476	26756829
A01	27381707	27380654
A01	27647809	27649163
A01	27901734	27902897
A01	27909843	27911193
A01	27944545	27945887
A01	27954400	27955724
A01	27984164	27982795
A01	27990634	27989279
A01	28128980	28130345
A01	28180116	28178755
A01	28261605	28260264
A01	28444575	28443223
A01	28837369	28836006
A01	28846405	28845040
A01	29355571	29354237
A01	29367618	29366289
A01	29392459	29391089
A01	29418167	29419524
A01	29820006	29818642
A01	29870613	29871850
A01	29878785	29880132
A01	30212068	30213447
A01	30233916	30235269
A01	30261341	30262408
A01	30737535	30738828
A01	30745279	30746636
A01	30820714	30821779
A01	30838652	30839757
A01	30949793	30950854
A01	31293827	31292474
A01	31296041	31294678
A01	31312712	31311332
A01	31456179	31457535
A01	31567927	31566660
A01	31898583	31897225
A01	32275903	32277234
A01	32441356	32442708
A01	32449546	32450897
A01	33553809	33554900
A01	33572450	33573539
A01	33632273	33630904
A01	33692409	33691043
A01	33706065	33704692
A01	34139000	34137636
A01	34147734	34146370
A01	34329129	34330497
A01	34342502	34343856
A01	34350110	34351475
A01	34357962	34359325
A01	34503339	34504694
A01	34511553	34512908
A01	34963290	34964625
A01	35147248	35148600
A01	35161061	35159699
A01	35296806	35298162
A01	35303354	35304702
A01	35623863	35622796
A01	35793316	35792104
A01	36015860	36017216
A01	36698339	36699703
A01	36706394	36707764
A01	37350708	37352048
A01	38239538	38238203
A01	38433745	38435107
A01	38803310	38804650
A01	38823593	38824949
A01	39493119	39492036
A01	39504561	39503478
A01	39690331	39688982
A01	40228613	40229965
A01	40235358	40236708
A01	41625881	41627240
A01	41788668	41790012
A01	41799664	41801017
A01	41979267	41977897
A01	42086088	42084771
A01	42095152	42093802
A01	42874014	42875358
A01	42935856	42937190
A01	43440984	43442315
A01	43465375	43466724
A01	43697715	43696361
A01	44057400	44056060
A01	46197058	46195973
A01	46381259	46382622
A01	46603942	46602601
A01	46610413	46609061
A01	46628930	46627576
A01	46958819	46960160
A01	46973801	46975156
A01	47055981	47054618
A01	47610373	47611726
A01	47619983	47621351
A01	47980823	47979473
A01	47987361	47986006
A01	48237872	48239225
A01	48244344	48245721
A01	48376186	48375113
A01	48704985	48703634
A01	48780364	48781734
A01	48799470	48798131
A01	48838735	48840098
A01	49132738	49133858
A01	49140127	49141371
A01	49189346	49190699
A01	49325654	49326825
A01	49373713	49375090
A01	49410777	49409456
A01	49444054	49442705
A01	50184898	50183819
A01	50321213	50319853
A01	50854352	50852971
A01	51349120	51350472
A01	51355464	51356832
A01	52750549	52751896
A01	53091717	53093064
A01	53439020	53437668
A01	53463394	53462322
A01	53777327	53775966
A01	53785430	53784060
A01	53959197	53958132
A01	54019134	54017782
A01	54027965	54026614
A01	54036105	54037464
A01	54616916	54618035
A01	57476082	57477430
A01	57482499	57483866
A01	57493833	57492495
A01	58171554	58172911
A01	58417493	58418828
A01	59003909	59005275
A01	59010312	59011667
A01	59444897	59446253
A01	60220710	60219553
A01	60316328	60317677
A01	60322692	60324038
A01	60656767	60655405
A01	60664968	60663608
A01	61233274	61232135
A01	61312562	61313913
A01	62382662	62384014
A01	62576201	62574832
A01	63005462	63006811
A01	63929916	63928556
A01	63938791	63937436
A01	64098785	64100144
A01	64652458	64651117
A01	64658850	64657485
A01	64743375	64742009
A01	65466708	65468097
A01	65839276	65837919
A01	65898642	65897315
A01	65977522	65978612
A01	66245863	66244693
A01	66254230	66252864
A01	66358415	66357039
A01	66442380	66443722
A01	66459265	66460609
A01	67688551	67689923
A01	68196347	68197707
A01	68207364	68208729
A01	68583968	68585308
A01	68950818	68951911
A01	69084700	69083334
A01	69366665	69365322
A01	69399335	69397983
A01	69593671	69592605
A01	70394378	70395734
A01	70404758	70406087
A01	70412929	70414272
A01	70513648	70512284
A01	70514144	70515211
A01	70829795	70831138
A01	70930866	70932232
A01	70939956	70941302
A01	71099000	71100367
A01	71499343	71500706
A01	71748043	71749396
A01	71756282	71757617
A01	72006024	72004668
A01	72014245	72012902
A01	72498459	72499808
A01	72514745	72516110
A01	72657549	72656200
A01	73383543	73382192
A01	73439978	73438609
A01	73469474	73468106
A01	73557025	73558381
A01	73663906	73662544
A01	73675603	73674248
A01	73685795	73684451
A01	73692454	73693827
A01	74669347	74668015
A01	74677567	74676229
A01	74762039	74760685
A01	74768434	74767084
A01	75913783	75915139
A01	75938381	75939742
A01	76014508	76013156
A01	76023075	76021723
A01	76133475	76134824
A01	76378423	76377071
A01	76596593	76597950
A01	76746933	76748307
A01	76755331	76756672
A01	77255928	77254553
A01	77323045	77321695
A01	77331965	77330607
A01	77533985	77535315
A01	77613835	77612471
A01	77617608	77618941
A01	77624312	77622967
A01	77741018	77742379
A01	77749263	77750622
A01	77885755	77884387
A01	77894058	77892736
A01	77902391	77901049
A01	78587049	78585678
A01	78603588	78604941
A01	78612238	78613589
A01	78957467	78956089
A01	78965357	78964019
A01	79084321	79082966
A01	79277865	79276521
A01	79286807	79285473
A01	79430991	79429631
A01	79494304	79493216
A01	79654118	79652798
A01	80156102	80154768
A01	80516264	80514918
A01	80550771	80549402
A01	80558975	80557610
A01	80657147	80655927
A01	80666296	80664929
A01	80698859	80697503
A01	80762410	80763769
A01	80887690	80886323
A01	80903350	80902050
A01	81233393	81232039
A01	81252180	81250826
A01	81376355	81377708
A01	82121979	82123169
A01	82130149	82131506
A01	82657973	82659336
A01	82679887	82681247
A01	83871306	83869969
A01	84000987	84002343
A01	84008500	84009583
A01	84421231	84419876
A01	84433389	84432038
A01	84895865	84897231
A01	85334172	85332847
A01	85343492	85342141
A01	85538927	85539995
A01	85546523	85547859
A01	85714432	85715782
A01	85743472	85744826
A01	85927432	85928795
A01	86031184	86032540
A01	86218927	86220287
A01	86226993	86228353
A01	86441934	86443286
A01	86450400	86451750
A01	87156151	87154841
A01	87287795	87286455
A01	87440392	87439025
A01	87449565	87448208
A01	87507846	87506494
A01	87518808	87520174
A01	87828799	87830139
A01	88350223	88349147
A01	88362567	88363897
A01	88365011	88363928
A01	88437640	88439006
A01	88796600	88797968
A01	89186285	89187522
A01	89452076	89450742
A01	89460441	89459090
A01	89504920	89503555
A01	89521655	89523026
A01	90078048	90076682
A01	90086348	90084994
A01	90096708	90095631
A01	90889705	90890867
A01	90901373	90902727
A01	91176733	91178086
A01	91440071	91441417
A01	91583580	91582217
A01	91589806	91588456
A01	91620021	91621375
A01	91781228	91782302
A01	91792399	91793461
A01	92224625	92225981
A01	92783024	92784380
A01	93579214	93580549
A01	93774119	93772755
A01	93781107	93779756
A01	93864196	93863122
A01	93933182	93934248
A01	94036680	94035316
A01	94776460	94775118
A01	94781085	94780023
A01	96557078	96555877
A01	96564239	96562877
A01	96599971	96598833
A01	97111837	97113173
A01	97133939	97135304
A02	2614189	2612924
A02	4226295	4224935
A02	5860840	5862188
A02	6540771	6541861
A02	7415442	7416793
A02	7425008	7426338
A02	8247971	8246606
A02	8442709	8444063
A02	8449145	8450520
A02	8987669	8986321
A02	9075264	9073929
A02	9083117	9081791
A02	9529994	9528644
A02	9536216	9534934
A02	9643245	9644574
A02	10195188	10196552
A02	10201371	10200014
A02	10209554	10208194
A02	10212377	10213765
A02	10971386	10972727
A02	11351862	11350510
A02	11383354	11382000
A02	11545427	11544053
A02	11809199	11807830
A02	11815658	11814294
A02	12034096	12032728
A02	12330024	12328670
A02	12387570	12386231
A02	12580148	12581487
A02	12615956	12614606
A02	12649529	12648186
A02	12657636	12656275
A02	12826817	12825455
A02	12844568	12843201
A02	13310541	13311910
A02	13316725	13315358
A02	13345654	13347000
A02	13352771	13354121
A02	13560990	13562341
A02	13569155	13570520
A02	13999505	14000859
A02	14056921	14058288
A02	14106357	14105011
A02	14114638	14113280
A02	14203149	14204513
A02	14215747	14217116
A02	14670147	14671218
A02	14676341	14677690
A02	15040715	15042067
A02	15092287	15093604
A02	15496862	15495493
A02	15583528	15582171
A02	16143648	16144700
A02	16152682	16154027
A02	16385731	16384377
A02	16394060	16392709
A02	16423583	16422246
A02	16828293	16826924
A02	16942686	16944069
A02	16949902	16948555
A02	17117450	17116108
A02	17120702	17119598
A02	17384983	17386046
A02	17800229	17801316
A02	18102539	18103893
A02	18186873	18188239
A02	18306320	18304984
A02	18342878	18344236
A02	18495793	18497147
A02	18505108	18506441
A02	19117395	19116048
A02	19127069	19125696
A02	19175404	19176480
A02	19183027	19184393
A02	19515393	19516752
A02	19799103	19800453
A02	20091189	20092524
A02	20105194	20106540
A02	20108537	20109898
A02	20153870	20152524
A02	20170748	20169417
A02	20510146	20511490
A02	20879299	20880649
A02	20888291	20889641
A02	21083138	21084477
A02	21106584	21107922
A02	21462565	21463920
A02	21777893	21776535
A02	21867764	21866397
A02	22107051	22105697
A02	22164088	22162735
A02	22254384	22253033
A02	22263575	22262220
A02	22929721	22928383
A02	23679259	23680579
A02	23686565	23687650
A02	23914450	23913208
A02	23929390	23928026
A02	25474643	25473278
A02	25590349	25591671
A02	25599363	25600719
A02	26225156	26223804
A02	26797513	26796147
A02	26803950	26802577
A02	27844330	27845692
A02	27852649	27854011
A02	27855029	27856386
A02	29275306	29276372
A02	29815827	29814762
A02	29835423	29834360
A02	29955843	29957197
A02	29964120	29965483
A02	30078555	30079905
A02	30087807	30088916
A02	31142020	31140639
A02	31152901	31154234
A02	31358649	31359935
A02	31436457	31437781
A02	31444707	31445891
A02	31706254	31707623
A02	32659778	32661140
A02	35934917	35933568
A02	36291976	36290895
A02	36294514	36295850
A02	36300917	36302283
A02	36506168	36504823
A02	36507663	36506305
A02	36516439	36515085
A02	36517177	36518515
A02	37167398	37166045
A02	37645698	37644339
A02	37742894	37744223
A02	37751162	37752531
A02	37918470	37917115
A02	37919525	37920883
A02	37986566	37987922
A02	38157085	38158436
A02	38780817	38782169
A02	40269852	40268502
A02	40276736	40275396
A02	40348539	40349877
A02	40813058	40814424
A02	41067875	41069175
A02	41216084	41217451
A02	41285712	41286770
A02	41297699	41296634
A02	41314293	41313227
A02	41760407	41759042
A02	41769171	41767805
A02	41778029	41776693
A02	42216019	42217347
A02	42390772	42392047
A02	43159852	43161220
A02	43473756	43472420
A02	43660196	43661552
A02	43895285	43896599
A02	43922197	43920847
A02	44030914	44029568
A02	44037442	44036076
A02	44389631	44390957
A02	44438343	44439694
A02	44447269	44448597
A02	44657810	44658875
A02	44702051	44703409
A02	44710283	44711577
A02	44926783	44928148
A02	45309261	45310609
A02	45407861	45409231
A02	46242308	46240968
A02	46389027	46387671
A02	46846246	46847591
A02	47030882	47029525
A02	47038983	47037634
A02	47123959	47122621
A02	47132877	47131517
A02	47389161	47390508
A02	47507861	47509229
A02	50031979	50033303
A02	50047007	50048356
A02	50528021	50529371
A02	51125593	51124242
A02	51157786	51156423
A02	51171325	51172693
A02	51528367	51527028
A02	52419618	52418264
A02	52554615	52555985
A02	52942386	52941018
A02	52976936	52978300
A02	52985176	52986533
A02	54221810	54220458
A02	54848747	54850100
A02	55018414	55019778
A02	55026743	55028109
A02	55790688	55792037
A02	55837072	55835723
A02	55848172	55846800
A02	56538851	56537485
A02	56546688	56545325
A02	57393358	57394710
A02	57401662	57403014
A02	57780626	57781998
A02	58045632	58046988
A02	58051768	58053136
A02	58445292	58443952
A02	58455935	58454628
A02	58993863	58994933
A02	59001859	59002924
A02	59223501	59222436
A02	59325130	59326491
A02	59485268	59483920
A02	59874741	59873371
A02	59883019	59881649
A02	59939158	59940513
A02	61169570	61170938
A02	61271842	61270473
A02	61283962	61282595
A02	61806123	61805034
A02	61882277	61883644
A02	61890509	61891866
A02	61998787	62000129
A02	63049658	63050951
A02	63058114	63059490
A02	63471320	63469992
A02	63869041	63870118
A02	63871487	63870135
A02	63876505	63877855
A02	63958483	63957133
A02	63966762	63965416
A02	64399273	64397929
A02	64407063	64405698
A02	65458783	65460151
A02	65466946	65468301
A02	65822491	65821126
A02	65830451	65829093
A02	65866509	65865159
A02	65868884	65870194
A02	65877770	65879090
A02	65883242	65881886
A02	67166204	67167570
A02	67182799	67184182
A02	67385206	67383851
A02	69861965	69863316
A02	70005487	70006839
A02	70013938	70015219
A02	71025392	71024055
A02	71033529	71032194
A02	71507241	71508608
A02	72520096	72518731
A02	72640912	72642246
A02	72649081	72650438
A02	72665847	72664493
A02	72705858	72704517
A02	72725290	72726633
A02	72731589	72732915
A02	72982643	72983735
A02	73179695	73178341
A02	73206501	73205146
A02	73216212	73217354
A02	73224262	73225425
A02	73698709	73697343
A02	73706336	73704998
A02	73769188	73767842
A02	73798569	73797215
A02	73815286	73813918
A02	73913941	73915295
A02	74025379	74026472
A02	74033333	74034431
A02	74047785	74046421
A02	74205060	74203709
A02	75658227	75659595
A02	75664475	75665698
A02	75706929	75707998
A02	75886396	75887747
A02	75902485	75903829
A02	76346766	76345404
A02	76354577	76353216
A02	76526084	76527438
A02	76555377	76554006
A02	76563596	76562276
A02	76660998	76659645
A02	76759793	76758596
A02	76768103	76766765
A02	76775825	76774458
A02	76785109	76783726
A02	76910834	76911901
A02	77012975	77011607
A02	77073457	77072127
A02	77095885	77094539
A02	77189285	77190355
A02	77198497	77197164
A02	77545155	77544089
A02	78023439	78024777
A02	78603040	78604169
A02	78606799	78608151
A02	78787284	78785914
A02	79719102	79720453
A02	79727362	79728713
A02	81729993	81731100
A03	4853932	4852594
A03	4924328	4925701
A03	5147304	5148603
A03	5199467	5198124
A03	5280323	5281664
A03	5283316	5282120
A03	5284749	5283383
A03	5293003	5291646
A03	5337271	5338625
A03	5438164	5436829
A03	7009317	7010674
A03	7016368	7017722
A03	7425665	7427030
A03	7433798	7435161
A03	8041408	8042764
A03	8226275	8224921
A03	8283413	8282067
A03	8291249	8289897
A03	8303256	8301902
A03	8306624	8305255
A03	8357062	8355707
A03	8386851	8385485
A03	8644051	8642698
A03	9303481	9302153
A03	9411346	9412698
A03	9419664	9420840
A03	9486374	9487745
A03	9494410	9493052
A03	9502517	9501160
A03	9749113	9747744
A03	9759475	9758337
A03	9777761	9776684
A03	9840507	9841569
A03	10032766	10033856
A03	10894369	10895716
A03	10914876	10913786
A03	10919620	10918268
A03	10933983	10935312
A03	10943142	10944485
A03	11062359	11063648
A03	11065013	11063657
A03	11074457	11073321
A03	11148387	11149769
A03	11156612	11157965
A03	11166117	11164783
A03	11242050	11243415
A03	11256280	11257633
A03	11363885	11365255
A03	11399122	11400484
A03	11406159	11407503
A03	11416247	11414894
A03	11637888	11639240
A03	12090315	12091412
A03	12476111	12477453
A03	12484068	12485420
A03	12968860	12967470
A03	13545471	13544394
A03	13596380	13595307
A03	13641432	13642784
A03	13755598	13756931
A03	13973178	13974544
A03	14104104	14105460
A03	14187164	14188228
A03	14351722	14353090
A03	14434423	14433062
A03	14442653	14441294
A03	14561269	14559904
A03	14983585	14984937
A03	15068831	15070183
A03	15077024	15078352
A03	15119772	15121139
A03	15709501	15708146
A03	16124176	16123092
A03	16133281	16132196
A03	16345165	16343801
A03	16351829	16350475
A03	16359500	16358155
A03	16724547	16725612
A03	17284815	17283463
A03	17671511	17670157
A03	17688056	17689416
A03	18147901	18146548
A03	18235111	18236467
A03	18720452	18719096
A03	18728617	18727476
A03	18781592	18780225
A03	18787922	18786570
A03	19283241	19284608
A03	19518261	19519614
A03	19858218	19857079
A03	20045036	20043693
A03	20242264	20243619
A03	20272438	20273806
A03	20279831	20281202
A03	20290903	20292242
A03	20310238	20311591
A03	20652488	20651122
A03	20945912	20944546
A03	21251213	21249874
A03	21360790	21359440
A03	21369757	21368392
A03	21800914	21799567
A03	21826590	21827938
A03	21904926	21906289
A03	22151458	22152520
A03	22649799	22648435
A03	22661484	22660121
A03	22945046	22943705
A03	23019310	23020646
A03	23027593	23028945
A03	24524451	24525789
A03	25118713	25117364
A03	25199632	25198264
A03	25206100	25204743
A03	25249126	25247769
A03	25284134	25282784
A03	25419980	25421355
A03	25429288	25430627
A03	25685164	25683806
A03	25696506	25695153
A03	26234189	26232846
A03	26891636	26893002
A03	26900013	26901379
A03	27627423	27626088
A03	28727525	28728882
A03	28735764	28737122
A03	29244186	29245255
A03	29321019	29322233
A03	29427826	29429194
A03	29928204	29926841
A03	30123111	30124475
A03	31089738	31088382
A03	31814495	31815860
A03	31824178	31825316
A03	32843076	32841709
A03	33023917	33025268
A03	33133818	33135163
A03	33142063	33143393
A03	33302006	33300890
A03	33309662	33308318
A03	33489145	33490512
A03	33503679	33504818
A03	33519684	33521049
A03	34775901	34777230
A03	34847508	34846174
A03	36890856	36892219
A03	36897358	36895993
A03	36900560	36901900
A03	37075317	37073965
A03	38755680	38757044
A03	38765100	38766464
A03	38853591	38854949
A03	39172647	39171306
A03	39180847	39179522
A03	39486834	39485468
A03	39766009	39764653
A03	39768812	39770164
A03	39777316	39778394
A03	39781118	39782481
A03	39797932	39799023
A03	40928970	40930315
A03	42197223	42195880
A03	43136630	43135279
A03	43323574	43322225
A03	43595909	43597252
A03	44650567	44651650
A03	44667263	44668627
A03	45389554	45390793
A03	45479285	45480634
A03	45487606	45488876
A03	45503218	45504560
A03	45518156	45516787
A03	45773474	45772122
A03	46491006	46492361
A03	48192056	48190701
A03	48200247	48198928
A03	48438360	48437060
A03	48440050	48441403
A03	48455886	48457237
A03	49477950	49476886
A03	49492882	49491820
A03	49519109	49517747
A03	49712511	49711162
A03	49828466	49827116
A03	50548816	50549910
A03	50711797	50710456
A03	50720041	50718684
A03	52064668	52066006
A03	52529722	52530930
A03	54149326	54147972
A03	54157371	54156006
A03	55128208	55129561
A03	55138380	55139548
A03	55161591	55162936
A03	55170006	55171366
A03	55525121	55526487
A03	55602089	55603424
A03	56578760	56577393
A03	56979175	56977832
A03	58470575	58471638
A03	58751321	58752678
A03	58760320	58761685
A03	58965183	58966537
A03	58995317	58996672
A03	59127914	59126571
A03	59507320	59505967
A03	59519410	59518058
A03	61583453	61582091
A03	61592307	61591169
A03	62323484	62324849
A03	62331485	62332851
A03	62433290	62434642
A03	62441480	62442835
A03	62678186	62679541
A03	62760510	62759159
A03	62768753	62767372
A03	63088841	63090198
A03	63966731	63967878
A03	64235571	64236938
A03	64265617	64266986
A03	64529683	64528346
A03	64992521	64993586
A03	65113341	65112261
A03	65143560	65142193
A03	65149734	65148404
A03	65558618	65557282
A03	65598644	65597578
A03	65612215	65610859
A03	65824768	65823409
A03	65924224	65922878
A03	65932329	65930973
A03	66083823	66085161
A03	66093898	66095263
A03	66096738	66098109
A03	66795729	66797096
A03	67214857	67213495
A03	67221288	67219929
A03	67397353	67398687
A03	67942034	67940674
A03	68024278	68025645
A03	68066091	68067232
A03	68458194	68459533
A03	68502900	68504254
A03	68610964	68609612
A03	68619141	68617791
A03	68787440	68786075
A03	70817085	70815716
A03	70915677	70914327
A03	71664933	71666253
A03	71909029	71910379
A03	72170103	72168733
A03	72724231	72723147
A03	73139369	73138014
A03	73602188	73603542
A03	73958595	73959952
A03	73964996	73966352
A03	74108998	74110088
A03	74118704	74120049
A03	74132630	74133999
A03	74387117	74388450
A03	74430024	74431374
A03	74436450	74437801
A03	74466467	74465098
A03	75251346	75250108
A03	75259689	75258331
A03	75952812	75954175
A03	76550989	76552326
A03	77110969	77112324
A03	77162089	77160724
A03	77171388	77170038
A03	77179670	77178330
A03	77241358	77239998
A03	77255295	77253935
A03	77261502	77260183
A03	77779209	77780571
A03	77859018	77860089
A03	78216887	78215524
A03	78225173	78223803
A03	78429692	78431043
A03	78758641	78757308
A03	78772540	78771172
A03	78836022	78834659
A03	78996464	78995110
A03	79009019	79007677
A03	79201321	79202688
A03	79233279	79234644
A03	79348113	79346777
A03	79415048	79413681
A03	79990564	79991702
A03	81895741	81897091
A03	82749097	82750170
A03	82754917	82755995
A03	82997942	82996592
A03	83013960	83012600
A03	83035777	83037128
A03	83459111	83457760
A03	84559266	84560619
A03	84704318	84705634
A03	84708436	84709802
A03	85040515	85041883
A03	85789977	85788646
A03	86180045	86178913
A03	86185220	86183869
A03	86191642	86190354
A03	86194333	86195641
A03	86214659	86216005
A03	86857919	86856564
A03	86863469	86862115
A03	87222262	87223430
A03	87429720	87428640
A03	87501982	87503055
A03	87507077	87505721
A03	87513626	87512258
A03	87777052	87775707
A03	88095767	88094712
A03	88225082	88223715
A03	88367885	88366542
A03	88436262	88434903
A03	89211610	89212948
A03	89217916	89219092
A03	89417702	89419056
A03	89453551	89452181
A03	89879971	89881328
A03	90239627	90240984
A03	90249910	90251258
A03	90253667	90255007
A03	90604997	90606363
A03	90611482	90612847
A03	90970097	90971452
A03	91032377	91031011
A03	91499373	91500726
A03	91787316	91788378
A03	92007644	92006313
A03	92015434	92014100
A03	92358160	92356807
A03	93188288	93186936
A03	93196642	93195277
A03	93253665	93252305
A03	93261884	93260517
A03	95559177	95560534
A04	2143145	2144506
A04	2178301	2179645
A04	2200765	2201848
A04	2230298	2231643
A04	3026803	3025737
A04	3044064	3042996
A04	5853403	5854729
A04	5860411	5861767
A04	7350389	7349067
A04	8035230	8036279
A04	8038965	8040014
A04	10493206	10491854
A04	10600696	10602069
A04	10710059	10711392
A04	10718337	10719692
A04	11116546	11117908
A04	12471982	12470642
A04	12479214	12477861
A04	12486232	12484873
A04	12488363	12487006
A04	12496875	12495519
A04	12509627	12508272
A04	12515124	12513771
A04	12539434	12538095
A04	12550848	12549498
A04	13032154	13030811
A04	13383866	13382517
A04	13423176	13424541
A04	14184246	14185558
A04	14195933	14197314
A04	14243731	14242660
A04	14377678	14376319
A04	15362660	15363747
A04	15561308	15562676
A04	17313184	17311816
A04	17316654	17315458
A04	17323943	17322617
A04	18364172	18362802
A04	20030363	20031461
A04	20136917	20138264
A04	20147969	20149325
A04	20734380	20735746
A04	20766876	20765521
A04	20777540	20776186
A04	21402033	21400669
A04	21416872	21415504
A04	21514128	21512774
A04	22077285	22075956
A04	22083594	22082231
A04	22603979	22602633
A04	23403159	23404516
A04	23575569	23576918
A04	23583913	23585256
A04	24375985	24377342
A04	24580501	24579171
A04	24598398	24597067
A04	24668679	24669949
A04	24673144	24671780
A04	24690019	24688654
A04	25221190	25219824
A04	25238735	25237490
A04	25558984	25557630
A04	25610655	25611720
A04	26298503	26299856
A04	26546390	26545032
A04	27232902	27234253
A04	27286006	27287162
A04	27668536	27669897
A04	27780048	27778692
A04	27828938	27830268
A04	30680597	30679320
A04	30980111	30981450
A04	31117163	31115804
A04	31223330	31221963
A04	32003548	32002185
A04	32136874	32138217
A04	32154731	32156079
A04	32161834	32163198
A04	32292010	32293370
A04	32298399	32299755
A04	32375642	32374288
A04	32382810	32381455
A04	32437475	32438827
A04	32445679	32447032
A04	32633224	32631887
A04	32636650	32635291
A04	32766899	32768219
A04	33040187	33041537
A04	33214671	33213549
A04	33338182	33336892
A04	33836673	33835321
A04	33845309	33843958
A04	33851422	33850066
A04	33871299	33869934
A04	34052517	34051163
A04	34058667	34057317
A04	34061506	34060151
A04	34064343	34062989
A04	34235521	34236870
A04	35246945	35245590
A04	35406235	35404896
A04	35408045	35406703
A04	36019785	36021137
A04	36027941	36029287
A04	36038917	36040288
A04	36049109	36050449
A04	36325706	36327076
A04	36342824	36344180
A04	36752302	36753657
A04	36766804	36768175
A04	37051409	37050053
A04	37143359	37141994
A04	37161900	37160539
A04	37228479	37227390
A04	37236625	37235537
A04	37427840	37426779
A04	37537945	37536580
A04	37567632	37566282
A04	37604638	37606003
A04	37707263	37708595
A04	37713717	37715054
A04	37978232	37976867
A04	37984563	37983415
A04	38201083	38199778
A04	38827988	38826609
A04	39209926	39208592
A04	39218244	39216891
A04	39325042	39323688
A04	39331505	39330151
A04	39657840	39656489
A04	39768824	39770191
A04	39861190	39862559
A04	40013715	40015055
A04	40118765	40120131
A04	40136638	40138005
A04	40265873	40267260
A04	40274959	40276326
A04	40314308	40315698
A04	40323526	40324894
A04	40345649	40344297
A04	40363047	40361711
A04	40606071	40605003
A04	40682303	40681246
A04	40988342	40989686
A04	41240605	41239240
A04	41248855	41247491
A04	41409638	41408425
A04	41417840	41416484
A04	42347776	42346409
A04	42356894	42355538
A04	42526654	42527916
A04	42529649	42530990
A04	42548769	42550109
A04	42626372	42627439
A04	42717755	42719123
A04	42856187	42857555
A04	42893113	42892026
A04	42921365	42920003
A04	42926840	42928184
A04	42950120	42951476
A04	43065533	43064384
A04	43368714	43370066
A04	43376847	43378200
A04	43528542	43529888
A04	43548566	43549924
A04	43822145	43823483
A04	43840183	43838844
A04	43853058	43851690
A04	43927638	43929016
A04	43933943	43935304
A04	43985302	43983944
A04	44023055	44021697
A04	44031129	44030079
A04	44185000	44183651
A04	44223056	44221686
A04	44231391	44230026
A04	44280111	44278755
A04	44344154	44342788
A04	44540568	44541920
A04	44557215	44558583
A04	44563705	44565058
A04	45036972	45038345
A04	45086121	45087216
A04	45720512	45721573
A04	45755508	45754139
A04	45760090	45758748
A04	45773252	45774611
A04	46091692	46090599
A04	46152672	46151595
A04	46329398	46330761
A04	46463290	46461922
A04	46469711	46468357
A04	46639280	46637910
A04	46647510	46646157
A04	47050077	47048706
A04	47296211	47297581
A04	47305301	47306667
A04	47483656	47485010
A04	47491914	47493266
A04	47596490	47597841
A04	47800908	47802264
A04	47848317	47849687
A04	47970526	47971880
A04	48016825	48018175
A04	48031173	48032499
A04	48059899	48061076
A04	48105105	48103736
A04	48207533	48206181
A04	48329584	48328219
A04	48404235	48402881
A04	48412363	48411081
A04	48578495	48579846
A04	48586123	48587446
A04	48652436	48651089
A04	48779885	48778512
A04	49101979	49103315
A04	49353899	49355013
A04	49362455	49363814
A04	49725571	49726924
A04	49729654	49728301
A04	49736797	49738154
A04	49739399	49740756
A04	49745870	49747210
A04	50589495	50590861
A04	51146645	51148003
A04	51155742	51157115
A04	51224505	51223149
A04	51230860	51229535
A04	51361468	51362822
A04	51616036	51614677
A04	51624205	51622873
A04	51819991	51821347
A04	51953495	51954852
A04	52052259	52050910
A04	52405096	52403734
A04	52971380	52972719
A04	53100026	53098655
A04	53103994	53105324
A04	53109704	53108335
A04	53123967	53125352
A04	53132283	53133651
A04	54291790	54293162
A04	54911633	54912696
A04	54992241	54990880
A04	55250416	55249348
A04	55415064	55413697
A04	55423347	55421985
A04	55681647	55682981
A04	55922643	55921270
A04	55937676	55938913
A04	56062993	56064328
A04	56423831	56424905
A04	56426273	56425035
A04	56772050	56773417
A04	56881465	56882811
A04	56982515	56981158
A04	57151517	57150149
A04	57159746	57158401
A04	58024244	58022892
A04	58094890	58096255
A04	58558550	58559632
A04	58564769	58566141
A05	1028324	1029698
A05	14908357	14909719
A05	19955748	19954587
A05	19963899	19962562
A05	22375462	22374117
A05	22384864	22383506
A05	22388593	22389679
A05	22895979	22897330
A05	22905073	22906422
A05	23314127	23315436
A05	23328312	23327233
A05	30259560	30258205
A05	30301690	30300334
A05	30317852	30316509
A05	30325979	30324622
A05	31139868	31141223
A05	31148045	31149417
A05	31160088	31158733
A05	31166334	31164980
A05	31632685	31631343
A05	32556357	32555292
A05	32562642	32561584
A05	33763240	33761890
A05	34473162	34471796
A05	34487681	34486339
A05	34585938	34587298
A05	35768999	35767643
A05	35775172	35773832
A05	36546076	36547439
A05	36551839	36553213
A05	37464217	37465350
A05	37467455	37466107
A05	38386952	38385636
A05	39200009	39201342
A05	39215451	39214084
A05	39657927	39659273
A05	39909303	39910672
A05	39917672	39918949
A05	39924168	39925519
A05	39930793	39932157
A05	40289927	40291267
A05	40297899	40299236
A05	40400158	40398843
A05	40408330	40406979
A05	40446168	40447455
A05	41216412	41217762
A05	41654222	41655587
A05	41856016	41854620
A05	41862287	41860915
A05	42354193	42352843
A05	42361926	42360579
A05	42655595	42654232
A05	42823233	42824587
A05	42923535	42924596
A05	42985432	42984088
A05	43107227	43105863
A05	43346453	43347793
A05	43353212	43354560
A05	43360358	43361711
A05	43608164	43609522
A05	43617281	43618561
A05	44067249	44065904
A05	44075671	44074318
A05	44433364	44432008
A05	44441625	44440254
A05	44445874	44444638
A05	44457116	44458483
A05	44480561	44479204
A05	44488714	44487355
A05	44500911	44499556
A05	44509251	44507881
A05	44511889	44513222
A05	44533557	44532206
A05	44552198	44553562
A05	45430460	45429123
A05	45449561	45448381
A05	45473273	45471972
A05	45713775	45712409
A05	45728850	45727465
A05	45831317	45832663
A05	46199106	46200463
A05	46209686	46211050
A05	46563670	46562314
A05	46686832	46688036
A05	46834546	46835891
A05	46899725	46900896
A05	47052628	47053707
A05	47086310	47087663
A05	47301074	47302391
A05	47310131	47311499
A05	47358234	47357170
A05	47388878	47387522
A05	47875460	47876815
A05	50077399	50078608
A05	50687924	50686571
A05	50871664	50870293
A05	50880469	50879088
A05	50899781	50901138
A05	50911734	50913060
A05	51131619	51130553
A05	51139844	51138765
A05	51197701	51198825
A05	51634317	51635429
A05	51652085	51651023
A05	51746411	51745318
A05	51850057	51851404
A05	51867659	51869001
A05	52064292	52062946
A05	52079702	52078344
A05	52188618	52189873
A05	52247471	52248840
A05	52824173	52822817
A05	53940284	53939216
A05	54221044	54219672
A05	54318762	54320135
A05	54337872	54339178
A05	54400111	54401478
A05	54408367	54409734
A05	54538852	54540185
A05	54689750	54691114
A05	55681844	55680486
A05	55835810	55834733
A05	55982677	55981340
A05	55991379	55990022
A05	56431217	56432375
A05	57177082	57178177
A05	57450964	57452252
A05	57466370	57467695
A05	58239560	58238194
A05	58551081	58552411
A05	58565539	58566906
A05	58689797	58688449
A05	58698092	58696738
A05	60001069	59999712
A05	60024832	60023478
A05	60213391	60212032
A05	60220857	60219498
A05	60232241	60230884
A05	60237078	60235723
A05	60265354	60264290
A05	61085762	61084431
A05	61094820	61093461
A05	61125830	61127196
A05	61147557	61148926
A05	61728400	61727045
A05	61737350	61736003
A05	61767163	61765796
A05	61925851	61924492
A05	63305013	63306367
A05	63312736	63314103
A05	64342674	64341580
A05	64622678	64623812
A05	64628793	64630147
A05	64635037	64636393
A05	64692674	64694028
A05	64830027	64831391
A05	64846371	64847736
A05	64882606	64883958
A05	64889103	64890454
A05	65177540	65176166
A05	65376573	65375213
A05	65753057	65754428
A05	66648960	66647603
A05	66662925	66661583
A05	66876344	66877707
A05	66887506	66888844
A05	66938491	66937140
A05	67015993	67014931
A05	67156907	67155554
A05	67165218	67163851
A05	67213964	67215319
A05	67250125	67251490
A05	67258375	67259558
A05	67351650	67350276
A05	67502330	67500961
A05	67510602	67509230
A05	67832125	67833487
A05	67840300	67841667
A05	68651961	68653328
A05	68659412	68660776
A05	68667583	68668889
A05	68939948	68938606
A05	68946194	68944855
A05	68956167	68954811
A05	69090370	69088999
A05	69439449	69438101
A05	69454135	69452818
A05	69493696	69495045
A05	69502029	69503365
A05	69585347	69586716
A05	69591772	69593139
A05	69812122	69810752
A05	69857379	69856026
A05	69865769	69864402
A05	69950524	69949452
A05	69974070	69972709
A05	70014542	70015608
A05	70690194	70688837
A05	70701362	70700009
A05	70707090	70708461
A05	70716159	70717528
A05	70720077	70718712
A05	71393686	71392322
A05	71401986	71400634
A05	72789221	72790564
A05	72806947	72808306
A05	72834837	72833745
A05	73427693	73429046
A05	73436744	73438112
A05	74384166	74382830
A05	74390556	74389202
A05	74626350	74625000
A05	76337104	76338456
A05	76357888	76359238
A05	76498332	76496976
A05	77268985	77267635
A05	77399076	77400428
A05	77407385	77408737
A05	77616937	77615601
A05	77790420	77791487
A05	77815188	77814104
A05	78165938	78167269
A05	78879556	78880924
A05	79460622	79461702
A05	80083416	80084780
A05	80092515	80093835
A05	80094224	80095571
A05	80110221	80111590
A05	81618595	81617505
A05	81631801	81632858
A05	81641917	81640543
A05	82046048	82047398
A05	82389471	82388111
A05	82395681	82394333
A05	84513473	84514807
A05	85269853	85268472
A05	85278333	85276992
A05	85313375	85312007
A05	85332310	85330954
A05	89481093	89482409
A05	89487383	89488725
A05	89849429	89850528
A06	3985246	3983909
A06	3997102	3995781
A06	4233631	4232465
A06	4461211	4462562
A06	4469584	4470933
A06	4498620	4499971
A06	6038223	6036873
A06	6038449	6039802
A06	7796634	7795268
A06	8717892	8719248
A06	8743884	8745254
A06	10840914	10842242
A06	10847573	10848925
A06	11094916	11096269
A06	11102905	11104258
A06	11202769	11201547
A06	11234560	11233229
A06	11385097	11384036
A06	11398940	11397575
A06	11448832	11449964
A06	11466179	11467546
A06	11470686	11472046
A06	11473512	11474855
A06	11485839	11487203
A06	11517681	11519037
A06	11524056	11525402
A06	11562779	11561427
A06	11569289	11567939
A06	11620060	11621403
A06	11730318	11728966
A06	11757059	11758189
A06	11770355	11769169
A06	11783220	11781880
A06	11907138	11905784
A06	12103118	12104436
A06	12110992	12112359
A06	12113187	12114538
A06	12118421	12117080
A06	12135536	12134188
A06	12171667	12170310
A06	12181548	12180192
A06	12238687	12240033
A06	12246909	12248258
A06	12400889	12399540
A06	12404300	12402946
A06	12442767	12444121
A06	12500329	12498966
A06	12623191	12624549
A06	12692102	12690734
A06	12705622	12706966
A06	12711849	12713207
A06	12723420	12724761
A06	12737779	12739137
A06	12745947	12747312
A06	12752394	12751037
A06	12780058	12778688
A06	12785011	12786351
A06	12787533	12788874
A06	13357643	13356288
A06	13962060	13960997
A06	14125432	14124072
A06	15102605	15101249
A06	16105718	16104409
A06	16178538	16177181
A06	16196986	16195627
A06	16310995	16312358
A06	16320413	16321754
A06	16426372	16425034
A06	16435782	16434423
A06	16446748	16445392
A06	16454977	16453610
A06	16476623	16477942
A06	16484801	16486163
A06	16510621	16511721
A06	17053880	17052516
A06	17115162	17116529
A06	17121928	17123295
A06	17317377	17316006
A06	17330302	17328939
A06	17406461	17405129
A06	17512978	17511610
A06	17522097	17520734
A06	17737204	17735834
A06	17743493	17742121
A06	17805865	17807218
A06	17858514	17859595
A06	18004193	18005550
A06	18012515	18013870
A06	18188883	18189969
A06	18315757	18314404
A06	18317048	18318416
A06	18339868	18341236
A06	18347862	18346497
A06	18591313	18589949
A06	18970658	18969311
A06	18995044	18996409
A06	19192385	19191005
A06	19529990	19531054
A06	19579363	19578309
A06	19677644	19678975
A06	19825117	19823762
A06	19833651	19832285
A06	19939639	19938277
A06	19950739	19949395
A06	19954463	19955563
A06	19992288	19990938
A06	20079570	20080946
A06	20087436	20088728
A06	20128651	20130029
A06	20140365	20141705
A06	20289114	20287777
A06	20296809	20295630
A06	20606967	20608335
A06	20613733	20615090
A06	21041790	21043141
A06	21048811	21050132
A06	21086815	21088159
A06	21169818	21168747
A06	21339510	21338156
A06	21347704	21346329
A06	21349004	21347705
A06	21629388	21628023
A06	21662902	21661562
A06	21931887	21930536
A06	21940908	21939555
A06	22364173	22365528
A06	22370574	22371924
A06	22384733	22386049
A06	22434911	22436269
A06	22457051	22458416
A06	22807554	22806396
A06	22976754	22978120
A06	23011392	23012455
A06	23077467	23076149
A06	23092741	23094061
A06	23373289	23374338
A06	23512528	23513876
A06	23590539	23591614
A06	23596641	23597995
A06	24015111	24016196
A06	24026668	24028015
A06	24080711	24082062
A06	24101148	24102489
A06	24479882	24478578
A06	24492674	24491315
A06	24511044	24509673
A06	24677732	24679070
A06	24687770	24689132
A06	24695990	24697345
A06	24860150	24861289
A06	24965646	24964289
A06	25059073	25060350
A06	25076610	25077976
A06	25226737	25228097
A06	25414260	25415356
A06	25428318	25426954
A06	25437644	25436279
A06	26129631	26130977
A06	26254447	26253081
A06	26266079	26264947
A06	26299892	26301264
A06	26439819	26441160
A06	26448053	26449212
A06	26565269	26566617
A06	26573385	26572046
A06	26581903	26580746
A06	27763584	27762233
A06	28345386	28344030
A06	28537027	28535683
A06	28859078	28860433
A06	29528505	29529674
A06	29842723	29841371
A06	29855136	29853809
A06	30924047	30922691
A06	30936748	30935374
A06	31500425	31499049
A06	31509366	31507993
A06	32051372	32052557
A06	32225358	32224010
A06	32231754	32230454
A06	32510304	32511582
A06	32568346	32569714
A06	33405915	33404844
A06	33587227	33588571
A06	33597118	33595784
A06	33942397	33941157
A06	33951486	33950139
A06	34161233	34159882
A06	34163177	34164477
A06	34391007	34392383
A06	34442456	34441089
A06	34453486	34452130
A06	34484328	34485696
A06	34497180	34498555
A06	34922141	34923440
A06	34936059	34937389
A06	35741357	35742420
A06	35819092	35817749
A06	35825658	35824309
A06	35900791	35902149
A06	35982328	35983686
A06	36457638	36456294
A06	36923576	36922220
A06	36931767	36930398
A06	37026180	37027506
A06	37641445	37642801
A06	37714802	37716152
A06	38282267	38283633
A06	38391687	38390338
A06	38399980	38398614
A06	38529117	38527920
A06	38853911	38852852
A06	38862923	38864017
A06	39129368	39128033
A06	39136595	39135252
A06	39249878	39251232
A06	39267482	39268831
A06	39320595	39319243
A06	39328792	39327439
A06	39511087	39512351
A06	39862511	39863850
A06	39871768	39873125
A06	40264517	40265884
A06	40272828	40274064
A06	40355943	40357228
A06	40576589	40577924
A06	40583415	40584765
A06	40590490	40589135
A06	41241002	41239937
A06	42288352	42289699
A06	42301316	42299954
A06	42633439	42634794
A06	42717591	42718941
A06	43140172	43138818
A06	43604399	43603046
A06	44122573	44121222
A06	44131729	44130387
A06	44418973	44417626
A06	44514199	44512843
A06	44766137	44767180
A06	44793677	44795017
A06	44801960	44803233
A06	44836470	44835105
A06	44844457	44843112
A06	45117016	45115936
A06	45531053	45532406
A06	45538298	45539450
A06	45556577	45557716
A06	46659376	46658007
A06	46712953	46714293
A06	46721171	46722490
A06	46943350	46944566
A06	46951599	46950258
A06	47412815	47414165
A06	47716435	47717801
A06	47722873	47724211
A06	47727174	47728238
A06	49842433	49843793
A06	49848205	49846847
A06	50320076	50321192
A06	50964707	50966060
A06	50972143	50973488
A06	51324312	51322947
A06	51615815	51614454
A06	51634688	51633336
A06	52008644	52010001
A06	52538333	52536963
A06	53575988	53574622
A06	54289471	54288411
A06	54675874	54674543
A06	54712526	54713888
A06	54734589	54735653
A06	59129097	59127891
A06	59133757	59132406
A06	59211553	59210184
A06	59219735	59218381
A06	59828888	59827527
A06	60019265	60017942
A06	60171810	60173160
A06	60565362	60564122
A06	61240611	61241964
A06	62574285	62573204
A06	62608648	62607305
A06	62933076	62934430
A06	63383756	63385106
A06	63819969	63818859
A06	63828381	63827223
A06	65658575	65657482
A06	66169366	66170703
A06	66180518	66181854
A06	66269506	66270841
A06	66299170	66297806
A06	66377703	66376404
A06	66387144	66385810
A06	66664205	66665462
A06	67081679	67083049
A06	67090048	67091318
A06	68506023	68507379
A06	69651902	69650541
A06	69660749	69659407
A06	70105236	70106547
A06	70201384	70202740
A06	70219899	70221253
A06	70386842	70388210
A06	70396005	70397350
A06	70943496	70942216
A06	71389523	71388184
A06	71749664	71748412
A06	71755644	71754293
A06	71868540	71869632
A06	72455741	72454387
A06	72531527	72530465
A06	72596343	72594985
A06	72604585	72603237
A06	72610535	72609182
A06	72622699	72621348
A06	73517370	73518721
A06	73555661	73554306
A06	73563846	73562549
A06	73675986	73677355
A06	73684406	73685729
A06	73832934	73834202
A06	73846158	73844800
A06	73914955	73913608
A06	74220615	74221678
A06	74719034	74717682
A06	74734054	74735424
A06	74742207	74743577
A06	74874899	74873531
A06	74879326	74880666
A06	74891225	74892579
A06	75242864	75243912
A06	75248324	75246972
A06	75252026	75250904
A06	75279843	75278481
A06	75285247	75283897
A06	75335115	75336442
A06	75343227	75344579
A06	75984041	75982687
A06	76180148	76178806
A06	76485114	76483737
A06	76493581	76492231
A06	76535231	76536267
A06	76643029	76644095
A06	76964971	76963607
A06	76997368	76996004
A06	77428643	77429997
A06	77799889	77801051
A06	77808689	77810028
A06	77816226	77814858
A06	77837495	77836130
A06	77977468	77978700
A06	77989658	77990993
A06	78586644	78585571
A06	78611504	78612558
A06	78745714	78747067
A06	78763639	78764718
A06	79443021	79444379
A06	79574325	79575663
A06	79582531	79583881
A06	79916530	79915174
A06	80163069	80161743
A06	80536026	80534649
A06	80567436	80566080
A06	81287916	81286850
A06	81499597	81498233
A06	81641534	81640181
A06	82296172	82297537
A06	82313975	82315342
A06	82330695	82332042
A06	82339211	82340566
A06	82985114	82986467
A06	83573010	83571944
A06	83580018	83578953
A06	83728529	83729657
A06	83744577	83743254
A06	83752740	83751393
A06	83821257	83819965
A06	83833373	83832014
A06	83836727	83835664
A06	83946858	83948197
A06	83971532	83972884
A06	85056033	85057392
A06	85081663	85083011
A06	85145565	85146920
A06	85219679	85218339
A06	85961431	85960069
A06	85969685	85968315
A06	86120014	86118664
A06	86190232	86191583
A06	86220904	86222028
A06	86238631	86239982
A06	86247793	86249134
A06	86288681	86287316
A06	86408332	86409704
A06	86687946	86686602
A06	87041380	87040028
A06	87314574	87315929
A06	87323644	87324970
A06	87359678	87361023
A06	87479263	87480602
A06	87487576	87488930
A06	88226652	88225296
A06	88235824	88234477
A06	88239326	88238076
A06	88922281	88920930
A06	89448541	89447166
A06	89464351	89462980
A06	89697478	89696087
A06	89832412	89831034
A06	89842040	89843418
A06	89844610	89843421
A06	90134618	90135839
A06	90425140	90426476
A06	90441316	90442671
A06	90481128	90479774
A06	90482543	90483898
A06	90583690	90584853
A06	90730161	90729020
A06	90989087	90988029
A06	91225821	91226951
A06	91430939	91429896
A06	91439126	91437781
A06	92228521	92229873
A06	92235014	92236378
A06	92525972	92527324
A06	92969042	92967689
A06	92977332	92975980
A06	93032467	93033815
A06	93038828	93040180
A06	93341280	93342626
A06	93349436	93350782
A06	93625448	93626817
A06	93634811	93636173
A06	93685063	93683704
A06	93912495	93913864
A06	93932976	93931604
A06	93949400	93948043
A06	93950955	93952297
[truncated: 2,864 more rows]

## Sheet: S4-2
Table S4-2 Distribution of CICR-LTR in (AD)1-BGI.
Chr.	Start	End
At_chr1	173948	172857
At_chr1	217644	216295
At_chr1	223352	222635
At_chr1	224035	223351
At_chr1	246961	245603
At_chr1	952888	951708
At_chr1	953137	952922
At_chr1	3679431	3679617
At_chr1	3679891	3680159
At_chr1	3680165	3681206
At_chr1	6167176	6168101
At_chr1	7987710	7987909
At_chr1	7987981	7988988
At_chr1	8000238	8001255
At_chr1	8179385	8178354
At_chr1	8179666	8179452
At_chr1	8186462	8185106
At_chr1	8260070	8260394
At_chr1	8260409	8261129
At_chr1	8269224	8270593
At_chr1	8284355	8284526
At_chr1	8304268	8305625
At_chr1	8351860	8353215
At_chr1	8360056	8361413
At_chr1	8649784	8648431
At_chr1	8668042	8666672
At_chr1	9152985	9151939
At_chr1	9161130	9160100
At_chr1	9166383	9165348
At_chr1	9431767	9431234
At_chr1	9708313	9706943
At_chr1	9712115	9711220
At_chr1	9723419	9722049
At_chr1	10061833	10061575
At_chr1	10064947	10063594
At_chr1	10210161	10211507
At_chr1	10216451	10215098
At_chr1	10227341	10226820
At_chr1	10311167	10310149
At_chr1	10311449	10311246
At_chr1	10327088	10326829
At_chr1	10327371	10328401
At_chr1	10335833	10336231
At_chr1	10344128	10343111
At_chr1	10344387	10344129
At_chr1	10356125	10354758
At_chr1	10365707	10364645
At_chr1	10366755	10367341
At_chr1	10419290	10420660
At_chr1	10440393	10441764
At_chr1	10482407	10483774
At_chr1	10501644	10503011
At_chr1	10586419	10587052
At_chr1	10588219	10589252
At_chr1	10596902	10597940
At_chr1	10767432	10767689
At_chr1	10767715	10768733
At_chr1	10776609	10777645
At_chr1	10788358	10787003
At_chr1	11084900	11086270
At_chr1	11091126	11092493
At_chr1	11348224	11347717
At_chr1	11349114	11348234
At_chr1	12339174	12339003
At_chr1	12350921	12350762
At_chr1	12367578	12368951
At_chr1	12375763	12377120
At_chr1	12543905	12545247
At_chr1	12551860	12553211
At_chr1	12643735	12642427
At_chr1	12951483	12952836
At_chr1	12957137	12957580
At_chr1	13074500	13075839
At_chr1	13218939	13217834
At_chr1	13219153	13218937
At_chr1	13226793	13225708
At_chr1	13346318	13347669
At_chr1	13638540	13637185
At_chr1	15409591	15410946
At_chr1	15549897	15551268
At_chr1	15559068	15560436
At_chr1	15576813	15577022
At_chr1	15577094	15577726
At_chr1	15896532	15895176
At_chr1	15904520	15903165
At_chr1	15921284	15922620
At_chr1	15929515	15930335
At_chr1	15930332	15930837
At_chr1	15952449	15952704
At_chr1	15952733	15953758
At_chr1	15960492	15961512
At_chr1	16125902	16127265
At_chr1	16132338	16133702
At_chr1	16401719	16403056
At_chr1	16409819	16411184
At_chr1	16504669	16503644
At_chr1	16538103	16537079
At_chr1	16567591	16566518
At_chr1	16579260	16578201
At_chr1	16579494	16579258
At_chr1	16689611	16690964
At_chr1	16847304	16845939
At_chr1	16920226	16918862
At_chr1	17192927	17193258
At_chr1	17223610	17223865
At_chr1	17223914	17224931
At_chr1	17237490	17238397
At_chr1	17635126	17635393
At_chr1	17635386	17636391
At_chr1	17836474	17837837
At_chr1	17844311	17845677
At_chr1	18038063	18038267
At_chr1	18038269	18039336
At_chr1	18406606	18405251
At_chr1	18749158	18747793
At_chr1	18757260	18755923
At_chr1	18915968	18915564
At_chr1	18922308	18921275
At_chr1	19252343	19250989
At_chr1	19263067	19261722
At_chr1	20279993	20279835
At_chr1	20287352	20286188
At_chr1	20290307	20290115
At_chr1	20367831	20366510
At_chr1	20406181	20407534
At_chr1	20414256	20415425
At_chr1	20415425	20415573
At_chr1	20449880	20449555
At_chr1	20595390	20596428
At_chr1	20732154	20732368
At_chr1	20732359	20733441
At_chr1	20743489	20743684
At_chr1	20743769	20744803
At_chr1	20916605	20917648
At_chr1	20917644	20917795
At_chr1	20941467	20942823
At_chr1	21150541	21149187
At_chr1	21182238	21180988
At_chr1	21194335	21193335
At_chr1	21306843	21306320
At_chr1	21364644	21363279
At_chr1	21373814	21372462
At_chr1	21668045	21669413
At_chr1	21680131	21681072
At_chr1	21684157	21685505
At_chr1	21695270	21696611
At_chr1	22009483	22008120
At_chr1	22427195	22426160
At_chr1	22511492	22511218
At_chr1	22934149	22934403
At_chr1	22934400	22935453
At_chr1	23024019	23025381
At_chr1	23037832	23036480
At_chr1	23354615	23353249
At_chr1	23372120	23370760
At_chr1	23391944	23390593
At_chr1	23400921	23399736
At_chr1	23404309	23404137
At_chr1	23816479	23817510
At_chr1	24643800	24644835
At_chr1	25279641	25281005
At_chr1	25976637	25975286
At_chr1	26223015	26222112
At_chr1	26259938	26258637
At_chr1	26268048	26267044
At_chr1	26321445	26320581
At_chr1	26723725	26722368
At_chr1	26739458	26739240
At_chr1	26740290	26739470
At_chr1	26805732	26807086
At_chr1	26844270	26845624
At_chr1	27261758	27262789
At_chr1	27411584	27410217
At_chr1	27418781	27417987
At_chr1	27754571	27753231
At_chr1	27767348	27767584
At_chr1	27767582	27768649
At_chr1	27772436	27771067
At_chr1	27778789	27777420
At_chr1	28043402	28042655
At_chr1	28045142	28043774
At_chr1	28053464	28052112
At_chr1	28100560	28099264
At_chr1	28438851	28439056
At_chr1	28486932	28487962
At_chr1	28495223	28496252
At_chr1	28984278	28983489
At_chr1	28993145	28992546
At_chr1	28993430	28993177
At_chr1	29029844	29028692
At_chr1	29032922	29032720
At_chr1	29040563	29039661
At_chr1	29040974	29040581
At_chr1	29073986	29072635
At_chr1	29124140	29125503
At_chr1	29132569	29133925
At_chr1	29182863	29183512
At_chr1	29187278	29187962
At_chr1	29795716	29795913
At_chr1	29795951	29796749
At_chr1	29883827	29884907
At_chr1	29891876	29891988
At_chr1	29892056	29893150
At_chr1	30060561	30061622
At_chr1	30350016	30351053
At_chr1	30774839	30776191
At_chr1	30783029	30784384
At_chr1	31085007	31086375
At_chr1	31656067	31657418
At_chr1	31670381	31671745
At_chr1	31724949	31723656
At_chr1	31919772	31918419
At_chr1	31968675	31970012
At_chr1	32422103	32421843
At_chr1	32482303	32481444
At_chr1	32482622	32482385
At_chr1	32490489	32489466
At_chr1	32885452	32886483
At_chr1	32893699	32894720
At_chr1	32983300	32983502
At_chr1	32983587	32984681
At_chr1	33132161	33133416
At_chr1	33138570	33139935
At_chr1	33531879	33531019
At_chr1	33537499	33536134
At_chr1	33593157	33594152
At_chr1	33600149	33601168
At_chr1	33639251	33637935
At_chr1	33649520	33650587
At_chr1	33918051	33917047
At_chr1	33937780	33936686
At_chr1	33937991	33937778
At_chr1	34253291	34252239
At_chr1	34871683	34871000
At_chr1	34871963	34871689
At_chr1	34891954	34890597
At_chr1	34913605	34914456
At_chr1	34919532	34920904
At_chr1	35451477	35452825
At_chr1	35457893	35458493
At_chr1	35461973	35462108
At_chr1	35473528	35474126
At_chr1	35622344	35622603
At_chr1	35622637	35623004
At_chr1	35626446	35627079
At_chr1	36064931	36064674
At_chr1	36146666	36145325
At_chr1	36298963	36297600
At_chr1	36307819	36306692
At_chr1	36308014	36307822
At_chr1	36367832	36368862
At_chr1	36375889	36376105
At_chr1	36376177	36377190
At_chr1	36640178	36641534
At_chr1	36648926	36650273
At_chr1	36760116	36759928
At_chr1	36766526	36767881
At_chr1	36775243	36775372
At_chr1	36776781	36778151
At_chr1	36779574	36778560
At_chr1	37440914	37440308
At_chr1	37660547	37661890
At_chr1	37669532	37670877
At_chr1	37695271	37696261
At_chr1	37805987	37807022
At_chr1	37862947	37864032
At_chr1	37871028	37872103
At_chr1	37881004	37879633
At_chr1	37889434	37888081
At_chr1	38068740	38069619
At_chr1	38076687	38077718
At_chr1	38225365	38225539
At_chr1	38230620	38230794
At_chr1	38371930	38372519
At_chr1	38911904	38910588
At_chr1	39069317	39067969
At_chr1	39095292	39095087
At_chr1	39254668	39253641
At_chr1	39254943	39254677
At_chr1	39262829	39261806
At_chr1	39263102	39262843
At_chr1	40096035	40094950
At_chr1	40096352	40096083
At_chr1	40104450	40103459
At_chr1	40192167	40191094
At_chr1	40196796	40196117
At_chr1	40197077	40196824
At_chr1	40366252	40366465
At_chr1	40366533	40367558
At_chr1	40374885	40375971
At_chr1	40459724	40461078
At_chr1	40468174	40469553
At_chr1	40575698	40574333
At_chr1	40926776	40926243
At_chr1	40937585	40936749
At_chr1	40946398	40945274
At_chr1	41543480	41542119
At_chr1	41569040	41567965
At_chr1	41569262	41569046
At_chr1	41934913	41933847
At_chr1	41935155	41934900
At_chr1	41944927	41943920
At_chr1	42108563	42107521
At_chr1	42115756	42114940
At_chr1	42138244	42137210
At_chr1	42146330	42145265
At_chr1	42162793	42163396
At_chr1	42178474	42179215
At_chr1	42186966	42188119
At_chr1	42636809	42637831
At_chr1	42646362	42647382
At_chr1	42737312	42737542
At_chr1	42737585	42738598
At_chr1	42745814	42746052
At_chr1	42746095	42747129
At_chr1	42914708	42916061
At_chr1	43016714	43016919
At_chr1	43019916	43020431
At_chr1	43023646	43024018
At_chr1	43219086	43220441
At_chr1	43260106	43260309
At_chr1	43260385	43260927
At_chr1	43260941	43261420
At_chr1	43327815	43326446
At_chr1	43367177	43367379
At_chr1	43367386	43367962
At_chr1	43392990	43394071
At_chr1	43673476	43672453
At_chr1	43681632	43680616
At_chr1	43725679	43724579
At_chr1	43725883	43725669
At_chr1	43735902	43736936
At_chr1	43743463	43742458
At_chr1	43885731	43884390
At_chr1	43962997	43964025
At_chr1	44708756	44709808
At_chr1	44896583	44897938
At_chr1	45228092	45229423
At_chr1	45240900	45241944
At_chr1	45249632	45248891
At_chr1	45249635	45250993
At_chr1	45257957	45259154
At_chr1	45259785	45259148
At_chr1	45266098	45264736
At_chr1	45351184	45350170
At_chr1	45364278	45362926
At_chr1	45371865	45370536
At_chr1	45396420	45397785
At_chr1	45400400	45399372
At_chr1	45404995	45404546
At_chr1	45411542	45410520
At_chr1	45412395	45413458
At_chr1	45414582	45415085
At_chr1	45424949	45425968
At_chr1	45517043	45518373
At_chr1	45519162	45520364
At_chr1	45559091	45558102
At_chr1	45559376	45559117
At_chr1	45577871	45576902
At_chr1	45667623	45668972
At_chr1	45672822	45671793
At_chr1	45686396	45685892
At_chr1	45686913	45686393
At_chr1	45691494	45690594
At_chr1	45695724	45695256
At_chr1	45702624	45701790
At_chr1	45717797	45716450
At_chr1	45770699	45770846
At_chr1	45770962	45771590
At_chr1	45771601	45772044
At_chr1	45779325	45780350
At_chr1	45797347	45796312
At_chr1	45973843	45972477
At_chr1	46336014	46334688
At_chr1	46359147	46358682
At_chr1	46364493	46363878
At_chr1	46364714	46364460
At_chr1	46421405	46422432
At_chr1	46433825	46434836
At_chr1	46772938	46771572
At_chr1	46779375	46778002
At_chr1	47089735	47089972
At_chr1	47090002	47091014
At_chr1	47097345	47098683
At_chr1	47105580	47106933
At_chr1	47108304	47109340
At_chr1	47190455	47190691
At_chr1	47190675	47191223
At_chr1	47211158	47211693
At_chr1	47218679	47218797
At_chr1	47218875	47219935
At_chr1	47651850	47653192
At_chr1	47660136	47660337
At_chr1	47660331	47661455
At_chr1	47716045	47716282
At_chr1	47716327	47717343
At_chr1	47717966	47719013
At_chr1	47725786	47726021
At_chr1	47725989	47727050
At_chr1	48300869	48299858
At_chr1	48309130	48308115
At_chr1	48424531	48423509
At_chr1	48519545	48518193
At_chr1	48525451	48524778
At_chr1	48602486	48601455
At_chr1	48816697	48815330
At_chr1	49130866	49129828
At_chr1	49222343	49223221
At_chr1	54658158	54659188
At_chr1	54673955	54675310
At_chr1	54764563	54763208
At_chr1	54945500	54946535
At_chr1	54948649	54947282
At_chr1	54956898	54955528
At_chr1	54963077	54963330
At_chr1	54963335	54964380
At_chr1	54982295	54980926
At_chr1	54990260	54989238
At_chr1	55364072	55362720
At_chr1	55372074	55371820
At_chr1	55372828	55372071
At_chr1	55376953	55375930
At_chr1	55377145	55376950
At_chr1	55387078	55386044
At_chr1	55620054	55621036
At_chr1	55625948	55626201
At_chr1	55626209	55627251
At_chr1	55703248	55701880
At_chr1	55709573	55708237
At_chr1	55762304	55761271
At_chr1	55932857	55931841
At_chr1	55940741	55939879
At_chr1	55952173	55951615
At_chr1	56080802	56081814
At_chr1	56090227	56091197
At_chr1	56173031	56172769
At_chr1	56182536	56181521
At_chr1	56232147	56230791
At_chr1	56242871	56241851
At_chr1	56243144	56242885
At_chr1	56255070	56254032
At_chr1	56255330	56255071
At_chr1	56420365	56420536
At_chr1	56781662	56782698
At_chr1	56891607	56890254
At_chr1	56926370	56925940
At_chr1	56935613	56934564
At_chr1	56937639	56936395
At_chr1	56952038	56950687
At_chr1	57266753	57266148
At_chr1	57270736	57269982
At_chr1	57345141	57344109
At_chr1	57345422	57345184
At_chr1	57350488	57350263
At_chr1	57350800	57350489
At_chr1	57351594	57351271
At_chr1	57352236	57351595
At_chr1	57358055	57356705
At_chr1	57360957	57359962
At_chr1	57361238	57361020
At_chr1	57361717	57362730
At_chr1	57508484	57509380
At_chr1	57626800	57625448
At_chr1	57811371	57812256
At_chr1	57966927	57965565
At_chr1	58067528	58066435
At_chr1	58067814	58067599
At_chr1	58068377	58069711
At_chr1	58076418	58077783
At_chr1	58166895	58167143
At_chr1	58167184	58168205
At_chr1	58175213	58175450
At_chr1	58175433	58176442
At_chr1	58223460	58224810
At_chr1	58241517	58240161
At_chr1	58265307	58264172
At_chr1	58280810	58282164
At_chr1	58287583	58286238
At_chr1	58290402	58291791
At_chr1	58296755	58295393
At_chr1	58304955	58303593
At_chr1	58364299	58362945
At_chr1	58788458	58789817
At_chr1	58799175	58800539
At_chr1	58800623	58800878
At_chr1	58800865	58801931
At_chr1	58822112	58823475
At_chr1	58831187	58832555
At_chr1	58900859	58902210
At_chr1	58909139	58910499
At_chr1	58971792	58971962
At_chr1	59110613	59111609
At_chr1	59136212	59135504
At_chr1	59147856	59146791
At_chr1	59148097	59147845
At_chr1	59446220	59445192
At_chr1	59459215	59458468
At_chr1	59463793	59464857
At_chr1	59471458	59471715
At_chr1	60304137	60302784
At_chr1	60310643	60309275
At_chr1	60343882	60345242
At_chr1	60390867	60389839
At_chr1	60391128	60390868
At_chr1	60412692	60411687
At_chr1	60503704	60502692
At_chr1	60764552	60764757
At_chr1	60764962	60765873
At_chr1	60891583	60890576
At_chr1	60891849	60891595
At_chr1	60899923	60898922
At_chr1	60900204	60899945
At_chr1	61928139	61927129
At_chr1	61980582	61981595
At_chr1	62025954	62027306
At_chr1	62032321	62033687
At_chr1	62136058	62137390
At_chr1	62292056	62292110
At_chr1	62304656	62305964
At_chr1	62322403	62323757
At_chr1	62435368	62436025
At_chr1	62444384	62445383
At_chr1	62455764	62456126
At_chr1	62687325	62686288
At_chr1	62786945	62787159
At_chr1	62787227	62788257
At_chr1	62940570	62939550
At_chr1	62960775	62960227
At_chr1	62962621	62962145
At_chr1	63032733	63031380
At_chr1	63132217	63132419
At_chr1	63136496	63137479
At_chr1	63153701	63153910
At_chr1	63153950	63155114
At_chr1	63219972	63221327
At_chr1	63819284	63818276
At_chr1	63819574	63819319
At_chr1	64083794	64082759
At_chr1	64714963	64715166
At_chr1	64715319	64716319
At_chr1	64727861	64729234
At_chr1	64759942	64761315
At_chr1	64953606	64954970
At_chr1	64962564	64963929
At_chr1	65099670	65098303
At_chr1	65131168	65132523
At_chr1	65137559	65138418
At_chr1	65741941	65740592
At_chr1	65889516	65888169
At_chr1	66078473	66079842
At_chr1	66092695	66094035
At_chr1	66173166	66172130
At_chr1	66638200	66636844
At_chr1	66651221	66650383
At_chr1	66654632	66654099
At_chr1	67183703	67185066
At_chr1	67204490	67203463
At_chr1	67204774	67204518
At_chr1	67211976	67210958
At_chr1	67233272	67234088
At_chr1	67251761	67250729
At_chr1	67252051	67251796
At_chr1	67305633	67304281
At_chr1	67710306	67711670
At_chr1	67960491	67959151
At_chr1	68046207	68045179
At_chr1	68052410	68051382
At_chr1	68052694	68052439
At_chr1	68167356	68168382
At_chr1	68183903	68184157
At_chr1	68184165	68184651
At_chr1	68377929	68377757
At_chr1	68466230	68465205
At_chr1	68466487	68466260
At_chr1	68497912	68496899
At_chr1	68498180	68497942
At_chr1	68565600	68566943
At_chr1	68574031	68574234
At_chr1	68574299	68575325
At_chr1	68612170	68611239
At_chr1	68621145	68620130
At_chr1	68879660	68880961
At_chr1	68887654	68888993
At_chr1	68903437	68904617
At_chr1	68921961	68923298
At_chr1	69032772	69033110
At_chr1	69033127	69034160
At_chr1	69041045	69042124
At_chr1	69042123	69042369
At_chr1	69174054	69175387
At_chr1	69381461	69380106
At_chr1	69530629	69529615
At_chr1	69530897	69530683
At_chr1	69568307	69568639
At_chr1	69579954	69580978
At_chr1	69588395	69587044
At_chr1	69638494	69638175
At_chr1	69648607	69647548
At_chr1	69690859	69689825
At_chr1	69715787	69714757
At_chr1	69716077	69715822
At_chr1	69720033	69718677
At_chr1	69722012	69720978
At_chr1	69726692	69726432
At_chr1	69732370	69731960
At_chr1	69733731	69732377
At_chr1	69734452	69733732
At_chr1	69734725	69734530
At_chr1	69921149	69919794
At_chr1	69931940	69930607
At_chr1	70039926	70038892
At_chr1	70192871	70193555
At_chr1	70193553	70194013
At_chr1	70201264	70201936
At_chr1	70202070	70202514
At_chr1	70336409	70335371
At_chr1	70342651	70342901
At_chr1	70343083	70343794
At_chr1	70348838	70347925
At_chr1	70352397	70352183
At_chr1	70679832	70680069
At_chr1	70680114	70681106
At_chr1	70683805	70682843
At_chr1	70691782	70690749
At_chr1	70701583	70701819
At_chr1	70701803	70702865
At_chr1	70967548	70968888
At_chr1	70975724	70977043
At_chr1	71185597	71184227
At_chr1	71192830	71191464
At_chr1	71216664	71215639
At_chr1	71225023	71223929
At_chr1	71269531	71268974
At_chr1	71269902	71269728
At_chr1	71275748	71274710
At_chr1	71521399	71522749
At_chr1	71534063	71535428
At_chr1	71621148	71622493
At_chr1	71627329	71627499
At_chr1	71627522	71628663
At_chr1	71634678	71636044
At_chr1	71664514	71663158
At_chr1	71725548	71726355
At_chr1	71806106	71807467
At_chr1	71923124	71924082
At_chr1	71926838	71927236
At_chr1	72443401	72442363
At_chr1	72495594	72494237
At_chr1	72498250	72497668
At_chr1	72507882	72506526
At_chr1	72656512	72655462
At_chr1	72678136	72677084
At_chr1	72697490	72698844
At_chr1	72713880	72714211
At_chr1	72714227	72715257
At_chr1	72723183	72721812
At_chr1	72729520	72728170
At_chr1	74820250	74819179
At_chr1	75339322	75337965
At_chr1	75544862	75546209
At_chr1	75549206	75548185
At_chr1	75555483	75554462
At_chr1	75560342	75561704
At_chr1	75601769	75602378
At_chr1	75605950	75606696
At_chr1	75697881	75696515
At_chr1	75705679	75704329
At_chr1	76224920	76225826
At_chr1	76666285	76667314
At_chr1	76678429	76679148
At_chr1	76686987	76685633
At_chr1	76858374	76859526
At_chr1	76866895	76868235
At_chr1	77057366	77056370
At_chr1	77394495	77394750
At_chr1	77394778	77395776
At_chr1	77422943	77422415
At_chr1	77534585	77533231
At_chr1	77549007	77547674
At_chr1	77550288	77549009
At_chr1	77680366	77679033
At_chr1	77688398	77688014
At_chr1	77689320	77688393
At_chr1	78444703	78446059
At_chr1	78456195	78456408
At_chr1	78468055	78468962
At_chr1	78528279	78526939
At_chr1	78536415	78535065
At_chr1	78987008	78988042
At_chr1	78995988	78996580
At_chr1	78996646	78996679
At_chr1	79056532	79057886
At_chr1	79831763	79831214
At_chr1	79832522	79831763
At_chr1	79840703	79839348
At_chr1	79892583	79893603
At_chr1	79908950	79907950
At_chr1	79932871	79932562
At_chr1	79951616	79951424
At_chr1	80073351	80074672
At_chr1	80079084	80078128
At_chr1	80085969	80084950
At_chr1	80090868	80092229
At_chr1	80272730	80273766
At_chr1	80310325	80308955
At_chr1	80317787	80317265
At_chr1	80327604	80326753
At_chr1	80475734	80476254
At_chr1	80487573	80486559
At_chr1	80537934	80538952
At_chr1	80543621	80542623
At_chr1	80698499	80699539
At_chr1	80986386	80985397
At_chr1	81252088	81251929
At_chr1	81702504	81701175
At_chr1	81708813	81707450
At_chr1	81924994	81923622
At_chr1	82032144	82032382
At_chr1	82032427	82033427
At_chr1	82041095	82042461
At_chr1	82073393	82074196
At_chr1	82800337	82798983
At_chr1	82834303	82833856
At_chr1	82834567	82834475
At_chr1	82836682	82835336
At_chr1	82844517	82843165
At_chr1	82849761	82848714
At_chr1	82856495	82855141
At_chr1	82859863	82858494
At_chr1	82866116	82866373
At_chr1	82866389	82867427
At_chr1	82874743	82875594
At_chr1	82894019	82895031
At_chr1	82908969	82907614
At_chr1	82938841	82937475
At_chr1	82940537	82939970
At_chr1	83217160	83217375
At_chr1	83217429	83218443
At_chr1	83244332	83243310
At_chr1	83244592	83244335
At_chr1	83252410	83251404
At_chr1	83932825	83931800
At_chr1	83933105	83932891
At_chr1	83941415	83940386
At_chr1	83941694	83941490
At_chr1	84224850	84223760
At_chr1	84225062	84224848
At_chr1	84237084	84236592
At_chr1	84237654	84237184
At_chr1	84237874	84237661
At_chr1	84413499	84412452
At_chr1	84413752	84413502
At_chr1	84419337	84418831
At_chr1	84419995	84419876
At_chr1	84527379	84526011
At_chr1	84596227	84595193
At_chr1	84618320	84618060
At_chr1	84627761	84627358
At_chr1	84784449	84783080
At_chr1	84792642	84791275
At_chr1	84915452	84914096
At_chr1	84986156	84987495
At_chr1	84988330	84989223
At_chr1	84995780	84997147
At_chr1	85134996	85136337
At_chr1	85651941	85650598
At_chr1	85659877	85658528
At_chr1	85660505	85659878
At_chr1	86034876	86033513
At_chr1	86045774	86044464
At_chr1	87415864	87417205
At_chr1	87433470	87434824
At_chr1	88912941	88911589
At_chr1	88931625	88932373
At_chr1	88952212	88950973
At_chr1	89164625	89165990
At_chr1	89227836	89229189
At_chr1	89242019	89242269
At_chr1	89242303	89242759
At_chr1	89242760	89243309
At_chr1	89250211	89251261
At_chr1	89255346	89255822
At_chr1	89255825	89256732
At_chr1	89270794	89269830
At_chr1	89271029	89270792
At_chr1	89314188	89313075
At_chr1	89315384	89314986
At_chr1	89316246	89315388
At_chr1	89323097	89321741
At_chr1	89407537	89408866
At_chr1	89413999	89415352
At_chr1	89463182	89464521
At_chr1	89482719	89481609
At_chr1	89483025	89482827
At_chr1	89523565	89522388
At_chr1	89632518	89631176
At_chr1	89644637	89643305
At_chr1	89821594	89820239
At_chr1	89833945	89832609
At_chr1	89835208	89834188
At_chr1	89843464	89842444
At_chr1	89849764	89848397
At_chr1	90339053	90338292
At_chr1	90362043	90361025
At_chr1	90642066	90641623
At_chr1	90913574	90913967
At_chr1	90913972	90914876
At_chr1	90918218	90917174
At_chr1	90918492	90918234
At_chr1	90927381	90926349
At_chr1	90932421	90933784
At_chr1	91122680	91121312
At_chr1	91248352	91246979
At_chr1	91258105	91257309
At_chr1	91304476	91305374
At_chr1	91337153	91338000
At_chr1	91344863	91346222
At_chr1	91458633	91459531
At_chr1	91477374	91477699
At_chr1	91480657	91481651
At_chr1	91573694	91574729
At_chr1	91610049	91608685
At_chr1	91615878	91615145
At_chr1	91616540	91615881
At_chr1	92334860	92333507
At_chr1	92400680	92400133
At_chr1	92407462	92406954
At_chr1	92590315	92589930
At_chr1	92591131	92590331
At_chr1	92591414	92591209
At_chr1	92598735	92598499
At_chr1	92606484	92606248
At_chr1	92818491	92817440
At_chr1	92818745	92818495
At_chr1	92819145	92818755
At_chr1	92819399	92819149
At_chr1	92825343	92824296
At_chr1	92825597	92825347
At_chr1	92825983	92825607
At_chr1	92873495	92874565
At_chr1	92890486	92890729
At_chr1	92890754	92891784
At_chr1	92938486	92937385
At_chr1	93097675	93097636
At_chr1	93113356	93112294
At_chr1	93897061	93896030
At_chr1	93905305	93904272
At_chr1	94068592	94069945
At_chr1	94072255	94072671
At_chr1	94309761	94309975
At_chr1	94310043	94311057
At_chr1	94317992	94318206
At_chr1	94318274	94319263
At_chr1	94386698	94385686
At_chr1	94395226	94394285
At_chr1	94395480	94395267
At_chr1	94600256	94601608
At_chr1	94620685	94622025
At_chr1	94670659	94672023
At_chr1	94750281	94751161
At_chr1	94757028	94758062
At_chr1	94788314	94787260
At_chr1	94788566	94788311
At_chr1	94808245	94807991
At_chr1	94814106	94815162
At_chr1	94822666	94822919
At_chr1	94827063	94826030
At_chr1	94827345	94827137
At_chr1	94963787	94963166
At_chr1	95043721	95044461
At_chr1	95076818	95075487
At_chr1	95091626	95090277
At_chr1	95299127	95299352
At_chr1	95299338	95300363
At_chr1	95332246	95333246
At_chr1	95367243	95366963
At_chr1	95367972	95367244
At_chr1	95368256	95367959
At_chr1	95375840	95375261
At_chr1	95376438	95375858
At_chr1	95377692	95376456
At_chr1	95378686	95377696
At_chr1	95393987	95395329
At_chr1	95402474	95402899
At_chr1	95407370	95406332
At_chr1	95408650	95407658
At_chr1	95416880	95416236
At_chr1	95417655	95416882
At_chr1	95425368	95424006
At_chr1	95440918	95440692
At_chr1	95441597	95440915
At_chr1	95527194	95527398
At_chr1	95527475	95528467
At_chr1	95927993	95928451
At_chr1	95929608	95928459
At_chr1	95941955	95942282
At_chr1	95942359	95942976
At_chr1	96883029	96882356
At_chr1	96883031	96883228
At_chr1	96883247	96884297
At_chr1	96889524	96890863
At_chr1	96901547	96900182
At_chr1	96941114	96942400
At_chr1	96947334	96948698
At_chr1	96984382	96984576
At_chr1	96984672	96985690
At_chr1	97010549	97010756
At_chr1	97010799	97011825
At_chr1	97105158	97105501
At_chr1	97141386	97140352
At_chr1	97144280	97143226
At_chr1	97207101	97208424
At_chr1	97219360	97220395
At_chr1	97222932	97224263
At_chr1	97370235	97369229
At_chr1	97370508	97370303
At_chr1	97376404	97375479
At_chr1	97376687	97376472
At_chr1	97711293	97712188
At_chr1	97734180	97734900
At_chr1	97749846	97750027
At_chr1	97771089	97771340
At_chr1	97771341	97772369
At_chr1	97782506	97782764
At_chr1	97782837	97783745
At_chr1	98048624	98049639
At_chr1	98060352	98061399
At_chr1	98078830	98077761
At_chr1	98079065	98078828
At_chr1	98089361	98088310
At_chr1	98089595	98089359
At_chr1	98099708	98098639
At_chr1	98099943	98099706
At_chr1	98535314	98534293
At_chr1	98535640	98535895
At_chr1	98535923	98536957
At_chr1	98539730	98539519
At_chr1	98584789	98585661
At_chr1	99218507	99219875
At_chr1	99225557	99226923
At_chr1	99457552	99456553
At_chr1	99457834	99457596
At_chr1	99464845	99463813
At_chr1	99465127	99464872
At_chr1	99768791	99768986
At_chr1	100037246	100036567
At_chr1	100044356	100043317
At_chr1	100044639	100044380
At_chr1	100093051	100092161
At_chr1	100093261	100093058
At_chr1	100112054	100110798
At_chr1	100281625	100282868
At_chr1	100312342	100313086
At_chr1	100317384	100318011
At_chr1	101160571	101161160
At_chr1	101168761	101169797
At_chr1	101274455	101275336
At_chr1	101280669	101281085
At_chr1	101444335	101445672
At_chr1	101452437	101453802
At_chr1	101904143	101902788
At_chr1	101926390	101925035
At_chr1	103264647	103263307
At_chr1	103275145	103274734
At_chr1	103451876	103450857
At_chr1	103452158	103451961
At_chr1	103828903	103829980
At_chr1	103835100	103835339
At_chr1	103835382	103835810
At_chr1	103846947	103847518
At_chr1	104372931	104374287
At_chr1	104619079	104619926
At_chr1	104629586	104629843
At_chr1	104629867	104630862
At_chr1	104642862	104641822
At_chr1	104673898	104675253
At_chr1	104702748	104704113
At_chr1	104963662	104962760
At_chr1	104977234	104977766
At_chr1	105013503	105014307
At_chr1	105021422	105022437
At_chr1	105076777	105077687
At_chr1	105080181	105080626
At_chr1	105123932	105122872
At_chr1	105174019	105173095
At_chr1	105194610	105194170
At_chr1	105419383	105420751
At_chr1	105427575	105428940
At_chr10	99839	100875
At_chr10	149691	148663
At_chr10	149975	149721
At_chr10	157871	156840
At_chr10	158154	157900
At_chr10	203364	204641
At_chr10	204643	204697
At_chr10	210234	211139
At_chr10	220835	222201
At_chr10	362162	363519
At_chr10	383616	382604
At_chr10	851022	849864
At_chr10	1110535	1111301
At_chr10	1129615	1130652
At_chr10	1133071	1134167
At_chr10	1134173	1134387
At_chr10	1144817	1145497
At_chr10	1145498	1146185
At_chr10	1147974	1146610
At_chr10	1157300	1155935
At_chr10	1172440	1171419
At_chr10	1180541	1179517
At_chr10	1356487	1355136
At_chr10	1365515	1364162
At_chr10	1779824	1781179
At_chr10	1786225	1787575
At_chr10	1800384	1801710
At_chr10	1806853	1807912
At_chr10	1819066	1819977
At_chr10	1848483	1848308
At_chr10	1849243	1848465
At_chr10	1849572	1849317
At_chr10	1858125	1857105
At_chr10	1858418	1858165
At_chr10	1880514	1879492
At_chr10	1880784	1880557
At_chr10	1887384	1888339
At_chr10	1891109	1891460
At_chr10	1891460	1892831
At_chr10	1900049	1901077
At_chr10	1910126	1911485
At_chr10	2036870	2036563
At_chr10	2055862	2056893
At_chr10	2057888	2058477
At_chr10	2069135	2070190
At_chr10	2138481	2137125
At_chr10	2145213	2143845
At_chr10	2300100	2300355
At_chr10	2313912	2314167
At_chr10	2314233	2315227
At_chr10	2366743	2367603
At_chr10	2459960	2461139
At_chr10	2467655	2468992
At_chr10	2606551	2607416
At_chr10	2617724	2616381
At_chr10	2620513	2619468
At_chr10	2628901	2627575
At_chr10	2669965	2668673
At_chr10	2677838	2676455
At_chr10	2757460	2758833
At_chr10	2765817	2767167
At_chr10	2803677	2802577
At_chr10	2803883	2803685
At_chr10	2807401	2808419
At_chr10	2808420	2808804
At_chr10	2818560	2819922
At_chr10	2822436	2822690
At_chr10	2822718	2823755
At_chr10	2824790	2823766
At_chr10	2824883	2824781
At_chr10	2825024	2824884
At_chr10	3133764	3135110
At_chr10	3148601	3147576
At_chr10	3148883	3148646
At_chr10	3445455	3445691
At_chr10	3445689	3446755
At_chr10	3456906	3457141
At_chr10	3457125	3458175
At_chr10	3500813	3502180
At_chr10	3504499	3505856
At_chr10	3512701	3514075
At_chr10	3669742	3670563
At_chr10	3688303	3687264
At_chr10	3696431	3695399
At_chr10	3722492	3721188
At_chr10	3754167	3753672
At_chr10	3754457	3755338
At_chr10	3779262	3778437
At_chr10	4871227	4871968
At_chr10	4872194	4872511
At_chr10	4886063	4884711
At_chr10	4896347	4896603
At_chr10	4896600	4897662
At_chr10	5075866	5076845
At_chr10	5099341	5099882
At_chr10	5144601	5145631
At_chr10	5616369	5615013
At_chr10	5624560	5623191
At_chr10	5666876	5667267
At_chr10	5667298	5667711
At_chr10	5682024	5683047
At_chr10	5717990	5719316
At_chr10	5772699	5773568
At_chr10	5844002	5843587
At_chr10	5844640	5843987
At_chr10	5844951	5844763
At_chr10	6041333	6041587
At_chr10	6041591	6042636
At_chr10	6052090	6053141
At_chr10	6056831	6055484
At_chr10	6375523	6374179
At_chr10	6392504	6391162
At_chr10	6480369	6481745
At_chr10	6898769	6900122
At_chr10	6906205	6907550
At_chr10	7307972	7306607
At_chr10	7315700	7314570
At_chr10	7328788	7329809
At_chr10	7338470	7339511
At_chr10	7427897	7426907
At_chr10	7443551	7442196
At_chr10	7509056	7509254
At_chr10	7509391	7510514
At_chr10	7567438	7566448
At_chr10	7997700	7996366
At_chr10	8015765	8014396
At_chr10	8036277	8037295
At_chr10	8129173	8130524
At_chr10	8138296	8139075
At_chr10	8139076	8139589
At_chr10	8150638	8149287
At_chr10	8162185	8160834
At_chr10	8262411	8263740
At_chr10	8270513	8271546
At_chr10	8298486	8299841
At_chr10	8306734	8307807
At_chr10	8384477	8385333
At_chr10	8450272	8451544
At_chr10	8454922	8454989
At_chr10	8462068	8463427
At_chr10	8522764	8524035
At_chr10	8530986	8532321
At_chr10	8563143	8562290
At_chr10	8574407	8573717
At_chr10	9014704	9013337
At_chr10	9021780	9021590
At_chr10	9027205	9026033
At_chr10	9041662	9040629
At_chr10	9048731	9048087
At_chr10	9049148	9048780
At_chr10	9049408	9049148
At_chr10	9095858	9096362
At_chr10	9117088	9117331
At_chr10	9117382	9118405
At_chr10	9325245	9323975
At_chr10	9325290	9325239
At_chr10	9333684	9332314
At_chr10	9722035	9720912
At_chr10	9757087	9758142
At_chr10	9765219	9766009
At_chr10	9882846	9884223
At_chr10	9901628	9902657
At_chr10	9921019	9919698
At_chr10	9921514	9922549
At_chr10	9955174	9954169
At_chr10	10695517	10696544
At_chr10	10705939	10706971
At_chr10	10742743	10744078
At_chr10	10749568	10750918
At_chr10	10756643	10755288
At_chr10	10759859	10759106
At_chr10	10760525	10759858
At_chr10	10766406	10765602
At_chr10	11328772	11327707
At_chr10	11336779	11336228
At_chr10	11752684	11751647
At_chr10	11752931	11752676
At_chr10	11787061	11787274
At_chr10	11787400	11787812
At_chr10	11797287	11797782
At_chr10	12121084	12119830
At_chr10	12129395	12128028
At_chr10	12421825	12422080
At_chr10	12422067	12423084
At_chr10	12993428	12992393
At_chr10	13001637	13000602
At_chr10	13072555	13071228
At_chr10	13079018	13077652
At_chr10	13120120	13118779
At_chr10	13157801	13156455
At_chr10	13480863	13481897
At_chr10	13864560	13864357
At_chr10	13870894	13869869
At_chr10	13871214	13871051
At_chr10	13900621	13900152
At_chr10	13933001	13931920
At_chr10	13933222	13933014
At_chr10	13968564	13967221
At_chr10	14085651	14087009
At_chr10	14237613	14237051
At_chr10	14241611	14240800
At_chr10	14249763	14248523
At_chr10	14360848	14361307
At_chr10	14361506	14362152
At_chr10	14381058	14382083
At_chr10	14718454	14719811
At_chr10	14726532	14727888
At_chr10	14742275	14742510
At_chr10	14742535	14743549
At_chr10	14748603	14748804
At_chr10	14748895	14749889
At_chr10	14802095	14803445
At_chr10	14822226	14823161
At_chr10	14826134	14826549
At_chr10	15083633	15083840
At_chr10	15083844	15084737
At_chr10	15084728	15084905
At_chr10	15245393	15246428
At_chr10	15252251	15253241
At_chr10	15262252	15260889
At_chr10	15271449	15270099
At_chr10	15313672	15314708
At_chr10	15357469	15357638
At_chr10	15365528	15365699
At_chr10	15420322	15420575
At_chr10	15420563	15421629
At_chr10	15575239	15574208
At_chr10	15582084	15581004
At_chr10	15669912	15668891
At_chr10	15670119	15669899
At_chr10	15677364	15676326
At_chr10	15720882	15721132
At_chr10	15721160	15722193
At_chr10	15933762	15933508
At_chr10	15947363	15946854
At_chr10	15947652	15947398
At_chr10	15982857	15984210
At_chr10	15990102	15991254
At_chr10	15991738	15991254
At_chr10	15999732	16000597
At_chr10	16008406	16009545
At_chr10	16038461	16039821
At_chr10	16451426	16452782
At_chr10	16482836	16484213
At_chr10	16529980	16528627
At_chr10	16565610	16564267
At_chr10	16819420	16819675
At_chr10	16819704	16820735
At_chr10	17068122	17066771
At_chr10	17077278	17075936
At_chr10	17271777	17271492
At_chr10	17278169	17276895
At_chr10	17375892	17374555
At_chr10	17389774	17388404
At_chr10	17395507	17394940
At_chr10	17407224	17408238
At_chr10	17409655	17411004
At_chr10	17417546	17418898
At_chr10	17421400	17421821
At_chr10	17426905	17428270
At_chr10	17451618	17450268
At_chr10	17606214	17607537
At_chr10	17702525	17703543
At_chr10	17708537	17709425
At_chr10	17782138	17783499
At_chr10	17810512	17811499
At_chr10	18004920	18006261
At_chr10	18019215	18018635
At_chr10	18024374	18023345
At_chr10	18109586	18110614
At_chr10	18116758	18117778
At_chr10	18413881	18412529
At_chr10	18462102	18463468
At_chr10	18470302	18471669
At_chr10	18500391	18499053
At_chr10	18693914	18694237
At_chr10	18694269	18695315
At_chr10	18703041	18704394
At_chr10	18803918	18802904
At_chr10	19005503	19004489
At_chr10	19779043	19778027
At_chr10	19779386	19779183
At_chr10	19807005	19805977
At_chr10	19807394	19807198
At_chr10	19946546	19947105
At_chr10	19947112	19947813
At_chr10	20094435	20093079
At_chr10	20103605	20102258
At_chr10	20339045	20339304
At_chr10	20339318	20340349
At_chr10	20345298	20345554
At_chr10	20345571	20346600
At_chr10	20423147	20422976
At_chr10	20464414	20463376
At_chr10	20464675	20464415
At_chr10	20472665	20471629
At_chr10	20477661	20476883
At_chr10	20485963	20484944
At_chr10	20495343	20496683
At_chr10	20570212	20568857
At_chr10	20635731	20634383
At_chr10	20659981	20658622
At_chr10	20688577	20687566
At_chr10	20688819	20688680
At_chr10	21607990	21607157
At_chr10	21616444	21615087
At_chr10	22202371	22201017
At_chr10	22210684	22209345
At_chr10	22211739	22210694
At_chr10	22220093	22219065
At_chr10	22220361	22220123
At_chr10	22278036	22278291
At_chr10	22278319	22279358
At_chr10	22326082	22324737
At_chr10	22341787	22342802
At_chr10	22362998	22361672
At_chr10	22372068	22370713
At_chr10	23300135	23299005
At_chr10	23300424	23300226
At_chr10	23530919	23529569
At_chr10	23542747	23541395
At_chr10	23862833	23861455
At_chr10	23872493	23873871
At_chr10	23994160	23994478
At_chr10	24006762	24008153
At_chr10	24240922	24242293
At_chr10	24256732	24258107
At_chr10	24724704	24725749
At_chr10	24749269	24748234
At_chr10	24756185	24755193
At_chr10	24759155	24759567
At_chr10	24759622	24760461
At_chr10	24768249	24768831
At_chr10	24768833	24769327
At_chr10	28447600	28446263
At_chr10	28454060	28452708
At_chr10	28630372	28629333
At_chr10	28630654	28630395
At_chr10	28778760	28778899
At_chr10	28778976	28779803
At_chr10	28779839	28780049
At_chr10	28974624	28973579
At_chr10	28974862	28974704
At_chr10	29024861	29024065
At_chr10	29028635	29028072
At_chr10	29378610	29379167
At_chr10	29386128	29386383
At_chr10	29386370	29387422
At_chr10	29388150	29387980
At_chr10	29392283	29391261
At_chr10	29395313	29395143
At_chr10	29408998	29410009
At_chr10	29415510	29416874
At_chr10	29719631	29720983
At_chr10	29731458	29732808
At_chr10	30147629	30146276
At_chr10	30155919	30154567
At_chr10	30194156	30195504
At_chr10	30200517	30201869
At_chr10	30506167	30507513
At_chr10	30514323	30514868
At_chr10	30514873	30515730
At_chr10	30769233	30770602
At_chr10	30778165	30779524
At_chr10	30825671	30825874
At_chr10	30826065	30827077
At_chr10	30829078	30827719
At_chr10	31060005	31061374
At_chr10	31080505	31079133
At_chr10	31098578	31097221
At_chr10	31100133	31101475
At_chr10	31124261	31125600
At_chr10	31132504	31133827
At_chr10	31173712	31175064
At_chr10	31197005	31195710
At_chr10	31205217	31204196
At_chr10	31479316	31478314
At_chr10	31479587	31479480
At_chr10	31496526	31495454
At_chr10	31496740	31496537
At_chr10	31573822	31572457
At_chr10	31659123	31660146
At_chr10	31667356	31665973
At_chr10	31675203	31673850
At_chr10	31785391	31784037
At_chr10	31794509	31794407
At_chr10	31810173	31809853
At_chr10	31810811	31810233
At_chr10	32259657	32260646
At_chr10	32924144	32925524
At_chr10	32933278	32934613
At_chr10	33287034	33286000
At_chr10	33287269	33287032
At_chr10	33297522	33296150
At_chr10	33540787	33541811
At_chr10	33549855	33551206
At_chr10	33557681	33558732
At_chr10	33561835	33562155
At_chr10	33570515	33570343
At_chr10	33827405	33827150
At_chr10	33886779	33887837
At_chr10	33895325	33895578
At_chr10	33895879	33896420
At_chr10	33964980	33966029
At_chr10	34189479	34188104
At_chr10	34637426	34636418
At_chr10	34656977	34656304
At_chr10	34757570	34758911
At_chr10	34763916	34765276
At_chr10	34841745	34840383
At_chr10	34944257	34942873
At_chr10	35388189	35388424
At_chr10	35388521	35389386
At_chr10	35393431	35393645
At_chr10	35393636	35394709
At_chr10	35401973	35402298
At_chr10	35405450	35406153
At_chr10	35594213	35593544
At_chr10	35602485	35601430
At_chr10	35674744	35673748
At_chr10	35675014	35674794
At_chr10	35687685	35687934
At_chr10	35687967	35689002
At_chr10	35849296	35848262
At_chr10	35849569	35849310
At_chr10	35933359	35932325
At_chr10	35933632	35933373
At_chr10	36180053	36179207
At_chr10	36192946	36191860
At_chr10	36193089	36192919
At_chr10	36295250	36294466
At_chr10	36306472	36305657
At_chr10	36718574	36717211
At_chr10	36726857	36725492
At_chr10	36760562	36761909
At_chr10	36768859	36769927
At_chr10	36773276	36773578
At_chr10	36806142	36807489
At_chr10	36843005	36841652
At_chr10	37250977	37252331
At_chr10	37542292	37540942
At_chr10	37552918	37551955
At_chr10	37679471	37678989
At_chr10	37698011	37696676
At_chr10	37716445	37715102
At_chr10	37834359	37833332
At_chr10	37844764	37843730
At_chr10	37962857	37963892
At_chr10	38068858	38067852
At_chr10	38069120	38068862
At_chr10	38076930	38075893
At_chr10	38077202	38076943
At_chr10	38644614	38643580
At_chr10	38654348	38653324
At_chr10	38654625	38654409
At_chr10	38659252	38659506
At_chr10	38659493	38660556
At_chr10	38662877	38664236
At_chr10	38675276	38676568
At_chr10	38690591	38690076
At_chr10	38724485	38723466
At_chr10	38724762	38724546
At_chr10	38729382	38729636
At_chr10	38729633	38730687
At_chr10	38733002	38734349
At_chr10	38741188	38742511
At_chr10	38757382	38756254
At_chr10	38757584	38757385
At_chr10	38835312	38834275
At_chr10	39250636	39249582
At_chr10	39280727	39279635
At_chr10	39280939	39280725
At_chr10	40278545	40278783
At_chr10	40278928	40279797
At_chr10	40285452	40286789
At_chr10	40293320	40294376
At_chr10	40296604	40297940
At_chr10	40300167	40300396
At_chr10	40300446	40301441
At_chr10	40386686	40388021
At_chr10	40416395	40415031
At_chr10	40496875	40495576
At_chr10	40506316	40504982
At_chr10	41081513	41081284
At_chr10	41588373	41587028
At_chr10	41597999	41597912
At_chr10	41599122	41598132
At_chr10	41775430	41774076
At_chr10	41795720	41794364
At_chr10	41800276	41800099
At_chr10	41898262	41896926
At_chr10	42497269	42495914
At_chr10	42550174	42548834
At_chr10	42553443	42552782
At_chr10	42562485	42563500
At_chr10	42564052	42564829
At_chr10	42569050	42568455
At_chr10	42579562	42580476
At_chr10	42598912	42597760
At_chr10	42599107	42598907
At_chr10	42767726	42766645
At_chr10	42767968	42767714
At_chr10	42775830	42774794
At_chr10	42850885	42851761
At_chr10	42881737	42883088
At_chr10	42887717	42888969
At_chr10	42933981	42932975
At_chr10	42934242	42933982
At_chr10	43028762	43027735
At_chr10	43036768	43035739
At_chr10	43049103	43047743
At_chr10	43056971	43055969
At_chr10	43077036	43077112
At_chr10	43082094	43082999
At_chr10	43083001	43083387
At_chr10	43084517	43084733
At_chr10	43306631	43307982
At_chr10	43567476	43568501
At_chr10	43713672	43713874
At_chr10	43713883	43714971
At_chr10	43721953	43722157
At_chr10	43722236	43722757
At_chr10	44794992	44796327
At_chr10	44944829	44945082
At_chr10	44958352	44958801
At_chr10	44977288	44977446
At_chr10	44984314	44985142
At_chr10	45331837	45330631
At_chr10	45336497	45335146
At_chr10	45408672	45409706
At_chr10	45415047	45413678
At_chr10	45423229	45421875
At_chr10	45436130	45437164
At_chr10	45439014	45439428
At_chr10	45446335	45446729
At_chr10	45446759	45447530
At_chr10	45464088	45464420
At_chr10	45474250	45474868
At_chr10	45481176	45482516
At_chr10	45516723	45518080
At_chr10	45668552	45667517
At_chr10	45676771	45675735
At_chr10	45677054	45676801
At_chr10	45806108	45807407
At_chr10	45807408	45808363
At_chr10	45819641	45820434
At_chr10	45821189	45822482
At_chr10	45829301	45830655
At_chr10	45833468	45832894
At_chr10	45853382	45853103
At_chr10	45853697	45853382
At_chr10	45896263	45896994
At_chr10	45906710	45907757
At_chr10	45996629	45997700
At_chr10	46086444	46086195
At_chr10	46117875	46116554
At_chr10	46124896	46123545
At_chr10	46384405	46383373
At_chr10	46391269	46390243
At_chr10	46417604	46416543
At_chr10	46436959	46437488
At_chr10	46438873	46439462
At_chr10	46450121	46450847
At_chr10	46992931	46993577
At_chr10	47409778	47408422
At_chr10	47625288	47626641
At_chr10	47932893	47934203
At_chr10	48175217	48176565
At_chr10	48182080	48183445
At_chr10	48209788	48211155
At_chr10	48605994	48604625
At_chr10	48613898	48612528
At_chr10	48631294	48630297
At_chr10	48705265	48703896
At_chr10	48890507	48891536
At_chr10	49183786	49182529
At_chr10	49226811	49225792
At_chr10	49415616	49414261
At_chr10	49462426	49463460
At_chr10	49470613	49471635
At_chr10	49754314	49755663
At_chr10	50031567	50032911
At_chr10	50208184	50209549
At_chr10	50275489	50274450
At_chr10	50384328	50385359
At_chr10	50398007	50399015
At_chr10	50405924	50406183
At_chr10	50406184	50407205
At_chr10	50427374	50428430
At_chr10	50428435	50428651
At_chr10	50439595	50440946
At_chr10	50476880	50475525
At_chr10	50485065	50483768
At_chr10	51009807	51011156
At_chr10	51220997	51222352
At_chr10	51267003	51267257
At_chr10	51358814	51357458
At_chr10	51369139	51368128
At_chr10	51551369	51551585
At_chr10	51551592	51552663
At_chr10	51557808	51558016
At_chr10	51558090	51559116
At_chr10	51576784	51577021
At_chr10	51577066	51578065
At_chr10	52496370	52495362
At_chr10	52504883	52504626
At_chr10	52906853	52905834
At_chr10	52907156	52906903
At_chr10	52914100	52913064
At_chr10	53112987	53114323
At_chr10	53132756	53134111
At_chr10	53162993	53164005
At_chr10	53167627	53166274
At_chr10	53169042	53170397
At_chr10	53277913	53278128
At_chr10	53278163	53279326
At_chr10	53424296	53423155
At_chr10	53445269	53444240
At_chr10	53482771	53483804
At_chr10	53682062	53681004
At_chr10	53682304	53682049
At_chr10	53746237	53745206
At_chr10	54183179	54181848
At_chr10	54190775	54190148
At_chr10	54194179	54193463
At_chr10	54203163	54203910
At_chr10	54213608	54214216
At_chr10	54221066	54222428
At_chr10	54242887	54243142
At_chr10	54243129	54244193
At_chr10	54251049	54251304
At_chr10	54251331	54252367
At_chr10	54826423	54827794
At_chr10	54838281	54839652
At_chr10	54869482	54868117
At_chr10	54946936	54948140
At_chr10	55080340	55078976
At_chr10	55088550	55088065
At_chr10	55089486	55088565
At_chr10	55090492	55089822
At_chr10	55093488	55093259
At_chr10	55188928	55189471
At_chr10	55189479	55189875
At_chr10	55196339	55196599
At_chr10	55196835	55197669
At_chr10	55412022	55412259
At_chr10	55412304	55413323
At_chr10	55835847	55834818
At_chr10	56628010	56626655
At_chr10	56636180	56634813
At_chr10	56710388	56711737
At_chr10	56865137	56864097
At_chr10	56882828	56881801
At_chr10	56883112	56882858
At_chr10	57128670	57130022
At_chr10	57147543	57148904
At_chr10	57435012	57436360
At_chr10	57443154	57443811
At_chr10	57490635	57489806
At_chr10	57490845	57490632
At_chr10	57677735	57678636
At_chr10	57699253	57697916
At_chr10	57701106	57700106
At_chr10	57701388	57701174
At_chr10	57798208	57799563
At_chr10	57894669	57896014
At_chr10	57902656	57904021
At_chr10	57937192	57935919
At_chr10	57945431	57944091
At_chr10	57973741	57972678
At_chr10	57973983	57973730
At_chr10	57988306	57987273
At_chr10	57988590	57988335
At_chr10	57997119	57996949
At_chr10	58079520	58080518
At_chr10	58142621	58143645
At_chr10	58145647	58144313
At_chr10	58237664	58236658
At_chr10	58238596	58237968
At_chr10	58246649	58245517
At_chr10	58246856	58246650
At_chr10	58564904	58563578
At_chr10	58835310	58834341
At_chr10	58884112	58885466
At_chr10	58940622	58939680
At_chr10	58944512	58944414
At_chr10	58944860	58944528
At_chr10	58952963	58951668
At_chr10	58956008	58957376
At_chr10	58965215	58966576
At_chr10	59042727	59044092
At_chr10	59321516	59322876
At_chr10	59327288	59325930
At_chr10	59406936	59407217
At_chr10	59417118	59418152
At_chr10	59763073	59764162
At_chr10	59766562	59766816
At_chr10	59987949	59988978
At_chr10	60183789	60184781
At_chr10	60231319	60232689
At_chr10	60683817	60685170
At_chr10	60701133	60702212
At_chr10	60758832	60757797
At_chr10	60759096	60758859
At_chr10	60767223	60766209
At_chr10	60767517	60767281
At_chr10	60979057	60980395
At_chr10	60987898	60989255
At_chr10	61418020	61418279
At_chr10	61418280	61419299
At_chr10	61426205	61426463
At_chr10	61426477	61427504
At_chr10	61525200	61526558
At_chr10	61530722	61529702
At_chr10	61531017	61530804
At_chr10	61660706	61662044
At_chr10	61668912	61670262
At_chr10	62065142	62064110
At_chr10	62104595	62104093
At_chr10	62262243	62260893
At_chr10	62335059	62334434
At_chr10	62338532	62337795
At_chr10	62346780	62345425
At_chr10	62696466	62697828
At_chr10	62709430	62708083
At_chr10	64655687	64656853
At_chr10	64665547	64665763
At_chr10	64835092	64836413
At_chr10	64844475	64845796
At_chr10	64856331	64857668
At_chr10	65142144	65143153
At_chr10	65154348	65153434
At_chr10	65184798	65183449
At_chr10	65193171	65191820
At_chr10	65333995	65333280
At_chr10	65333996	65334193
At_chr10	65334390	65335421
At_chr10	65343086	65343289
At_chr10	65343374	65344445
At_chr10	65345224	65345021
At_chr10	65357120	65355761
At_chr10	65443557	65443730
At_chr10	65523846	65524081
At_chr10	65524107	65525135
At_chr10	66316626	66315603
At_chr10	67119052	67117702
At_chr10	67119278	67120631
At_chr10	67121866	67122598
At_chr10	67128274	67127352
At_chr10	67136376	67135381
At_chr10	67301838	67302091
At_chr10	67302122	67303157
At_chr10	67310566	67310816
At_chr10	67967817	67966976
At_chr10	67995849	67996096
At_chr10	68576270	68574904
At_chr10	68582398	68581346
At_chr10	69222059	69221046
At_chr10	69239275	69240302
At_chr10	69243127	69243439
At_chr10	69321929	69321063
At_chr10	69328624	69327591
At_chr10	69343603	69342585
At_chr10	69351008	69349968
At_chr10	69351290	69351035
At_chr10	69355126	69354722
At_chr10	69355978	69355131
At_chr10	69356260	69356005
At_chr10	69360733	69359692
At_chr10	69458504	69458669
At_chr10	69513729	69515085
At_chr10	69541049	69542419
At_chr10	69592130	69592299
At_chr10	69925710	69925960
At_chr10	69925993	69927025
At_chr10	70344888	70345055
At_chr10	70747855	70748014
At_chr10	70994179	70994392
At_chr10	70994446	70995457
At_chr10	71002708	71002877
At_chr10	71002967	71003987
At_chr10	71654034	71655362
At_chr10	71660693	71662045
At_chr10	71806449	71807480
At_chr10	71812414	71813441
At_chr10	71883038	71884351
At_chr10	71913179	71914532
At_chr10	71921202	71922555
At_chr10	71998101	71998313
At_chr10	72019172	72018671
At_chr10	72024212	72022990
At_chr10	72137153	72135812
At_chr10	72139675	72138335
At_chr10	72144628	72145998
At_chr10	72161268	72162296
At_chr10	72168967	72169222
At_chr10	72169250	72170279
At_chr10	72172338	72173695
At_chr10	72178785	72177420
At_chr10	72186953	72185595
At_chr10	72201818	72200477
At_chr10	72213389	72212031
At_chr10	72219616	72218272
At_chr10	72221820	72222449
At_chr10	72233037	72234405
At_chr10	72274499	72273141
At_chr10	72293051	72292193
At_chr10	72300691	72301719
At_chr10	72318122	72318379
At_chr10	72318380	72319388
At_chr10	72678574	72677661
At_chr10	72695176	72693967
At_chr10	72809271	72808274
At_chr10	72815113	72813764
At_chr10	72914059	72913022
At_chr10	72936953	72935604
At_chr10	72945211	72943865
At_chr10	73047108	73048059
At_chr10	73057759	73059116
At_chr10	73094077	73095425
At_chr10	73100727	73099683
At_chr10	73100989	73100739
At_chr10	73108519	73107465
At_chr10	73111248	73112589
At_chr10	73116482	73115131
At_chr10	73118677	73117310
At_chr10	73126594	73125276
At_chr10	73247676	73246777
At_chr10	73251006	73250604
At_chr10	73290636	73290807
At_chr10	73315614	73316968
At_chr10	73441338	73442678
At_chr10	73454776	73456133
At_chr10	73468309	73467179
At_chr10	73468603	73468407
At_chr10	73471917	73472961
At_chr10	73480901	73481155
At_chr10	73481196	73482156
At_chr10	73484413	73484483
At_chr10	73494633	73495985
At_chr10	73502904	73503230
At_chr10	73506222	73506558
At_chr10	73782922	73783596
At_chr10	73789820	73790288
At_chr10	73790289	73791015
At_chr10	73803612	73804469
At_chr10	73812124	73812963
At_chr10	73838325	73838253
At_chr10	73839313	73838324
At_chr10	73870710	73869367
At_chr10	73920552	73921902
At_chr10	73927062	73928414
At_chr10	73985828	73984482
At_chr10	73992231	73990875
At_chr10	74025450	74024073
At_chr10	74039184	74037824
At_chr10	74043691	74042324
At_chr10	74051198	74050165
At_chr10	74057734	74057426
At_chr10	74060722	74059590
At_chr10	74881715	74883071
At_chr10	75448518	75447506
At_chr10	75448797	75448591
At_chr10	75456282	75455871
At_chr10	75456878	75456642
At_chr10	75752890	75751854
At_chr10	75759697	75758668
At_chr10	75770762	75771660
At_chr10	75774350	75773367
At_chr10	75782878	75782623
At_chr10	75792765	75794125
At_chr10	75798562	75797566
At_chr10	75953754	75953917
At_chr10	76037690	76039027
At_chr10	76128121	76126765
At_chr10	76148192	76147926
At_chr10	77119962	77120999
At_chr10	77123418	77124514
At_chr10	77124520	77124734
At_chr10	77135204	77135884
At_chr10	77135885	77136572
At_chr10	77138361	77136997
At_chr10	77147687	77146322
At_chr10	77174294	77173273
At_chr10	77439036	77440093
At_chr10	77515937	77514596
At_chr10	77535512	77534161
At_chr10	77589645	77588298
At_chr10	77601202	77600117
At_chr10	77601423	77601186
At_chr10	77611999	77610963
At_chr10	77612282	77612023
At_chr10	77993210	77992184
At_chr10	78022533	78021179
At_chr10	78028607	78027532
At_chr10	78029271	78029894
At_chr10	78038803	78039426
At_chr10	78060507	78059159
At_chr10	78136145	78135082
At_chr10	78136385	78136133
At_chr10	78171330	78170174
At_chr10	78171597	78171338
At_chr10	78267425	78266805
At_chr10	78267644	78267408
At_chr10	78791204	78792361
At_chr10	78799722	78801061
At_chr10	78807838	78806490
At_chr10	78809896	78808869
At_chr10	78830224	78829065
At_chr10	78838458	78837117
At_chr10	79022092	79021302
At_chr10	79022331	79022086
At_chr10	79041517	79041740
At_chr10	79056360	79057718
At_chr10	79078528	79079893
At_chr10	79214294	79212931
At_chr10	79219489	79219198
At_chr10	79219948	79219490
At_chr10	79220059	79219948
At_chr10	79229052	79230419
At_chr10	79389469	79390838
At_chr10	79447536	79446703
At_chr10	79456007	79454982
At_chr10	79501379	79500634
At_chr10	79596236	79596924
At_chr10	79619734	79620110
At_chr10	79622564	79623604
At_chr10	79623613	79624626
At_chr10	79696266	79695231
At_chr10	79970814	79971558
At_chr10	79977418	79978032
At_chr10	79983145	79984496
At_chr10	80234219	80235225
At_chr10	80239095	80239817
At_chr10	80472759	80471728
At_chr10	80549737	80548380
At_chr10	80557131	80556266
At_chr10	80571600	80571274
At_chr10	80737452	80736108
At_chr10	80799795	80798786
At_chr10	80801790	80800946
At_chr10	80802069	80801862
At_chr10	80849722	80849422
At_chr10	80850001	80849794
At_chr10	80895144	80894118
At_chr10	80895423	80895253
At_chr10	81045703	81047058
At_chr10	81392828	81391794
At_chr10	81393111	81392914
At_chr10	81401746	81400735
At_chr10	81402028	81401814
At_chr10	81438175	81439527
At_chr10	81457724	81459077
At_chr10	81509635	81510665
At_chr10	81519291	81520335
At_chr10	81728568	81728830
At_chr10	81739879	81740953
At_chr10	81751201	81751579
At_chr10	81769009	81770133
At_chr10	81781149	81781360
At_chr10	82235289	82236657
At_chr10	82415412	82416712
At_chr10	82421808	82423156
At_chr10	82592058	82590873
At_chr10	82592170	82592100
At_chr10	82599526	82599327
At_chr10	82798931	82800269
At_chr10	82824775	82823750
At_chr10	82850667	82849646
At_chr10	82850961	82850724
At_chr10	82852950	82851608
At_chr10	82859774	82859350
At_chr10	82859890	82859773
At_chr10	83073140	83074169
At_chr10	83079413	83080443
At_chr10	83170313	83171660
At_chr10	83179402	83180642
At_chr10	83632101	83632987
At_chr10	83643410	83644091
At_chr10	84048461	84049495
At_chr10	84054201	84054681
At_chr10	84071168	84071690
At_chr10	84076640	84077678
At_chr10	84084686	84085749
At_chr10	84165971	84164628
At_chr10	84172537	84171188
At_chr10	84246314	84247672
At_chr10	84259474	84258175
At_chr10	84651024	84649649
At_chr10	84664014	84662646
At_chr10	84676956	84677956
At_chr10	84705682	84707038
At_chr10	84716270	84717637
At_chr10	84765903	84764527
At_chr10	84769088	84770113
At_chr10	84774993	84775916
At_chr10	84870692	84871658
At_chr10	84887013	84887473
At_chr10	84896636	84895621
At_chr10	84907857	84906844
At_chr10	84974269	84975329
At_chr10	85000925	84999625
At_chr10	85002869	85004220
At_chr10	85038992	85039242
At_chr10	85119722	85120196
At_chr10	85183233	85184577
At_chr10	85187611	85188633
At_chr10	85247580	85247940
At_chr10	85269906	85270164
At_chr10	85270165	85271200
[truncated: 11,915 more rows]

## Sheet: S4-3
Table S4-3 Distribution of CICR-LTR in (AD)2-CAS.
Chr.	Start	End
At_S0001_A01	6944401	6943049
At_S0001_A01	8861819	8863173
At_S0001_A01	8867580	8868933
At_S0001_A01	8888883	8887527
At_S0001_A01	8918829	8917465
At_S0001_A01	9060483	9059117
At_S0001_A01	9071769	9072833
At_S0001_A01	9409769	9411109
At_S0001_A01	9418054	9419325
At_S0001_A01	9429206	9427841
At_S0001_A01	9678888	9677823
At_S0001_A01	9698454	9699824
At_S0001_A01	10243548	10242179
At_S0001_A01	10269702	10268401
At_S0001_A01	10273005	10274331
At_S0001_A01	10279128	10280492
At_S0001_A01	10283289	10284377
At_S0001_A01	10290893	10289538
At_S0001_A01	10538951	10537705
At_S0001_A01	10539727	10541051
At_S0001_A01	10595486	10596603
At_S0001_A01	10624417	10625776
At_S0001_A01	10637048	10638178
At_S0001_A01	10712077	10713417
At_S0001_A01	10723702	10725054
At_S0001_A01	10960847	10962187
At_S0001_A01	10965279	10966633
At_S0001_A01	11129747	11131090
At_S0001_A01	11143682	11145040
At_S0001_A01	11610051	11611271
At_S0001_A01	12527690	12526578
At_S0001_A01	12871693	12870325
At_S0001_A01	12879894	12878792
At_S0001_A01	12911034	12912370
At_S0001_A01	12915027	12916381
At_S0001_A01	12947431	12948784
At_S0001_A01	12961478	12960110
At_S0001_A01	13833778	13834846
At_S0001_A01	13849767	13848411
At_S0001_A01	14187466	14186073
At_S0001_A01	14498966	14497639
At_S0001_A01	14506068	14504701
At_S0001_A01	14921371	14920012
At_S0001_A01	14931540	14932915
At_S0001_A01	14936252	14937607
At_S0001_A01	14942382	14941150
At_S0001_A01	14976640	14975261
At_S0001_A01	14985729	14984376
At_S0001_A01	15177431	15178497
At_S0001_A01	15410757	15409579
At_S0001_A01	15503070	15504188
At_S0001_A01	16010029	16011140
At_S0001_A01	16011184	16012534
At_S0001_A01	16034429	16035778
At_S0001_A01	16088323	16089688
At_S0001_A01	16463600	16464831
At_S0001_A01	16480859	16482212
At_S0001_A01	16486974	16485874
At_S0001_A01	17233162	17234270
At_S0001_A01	17249457	17250572
At_S0001_A01	17311604	17312965
At_S0001_A01	17319498	17320867
At_S0001_A01	17543334	17541989
At_S0001_A01	17554936	17553621
At_S0001_A01	17556995	17555870
At_S0001_A01	18226044	18224695
At_S0001_A01	18234397	18233046
At_S0001_A01	18552082	18551017
At_S0001_A01	18996561	18997916
At_S0001_A01	19004725	19006080
At_S0001_A01	19100914	19099581
At_S0001_A01	20265164	20266528
At_S0001_A01	20279711	20281050
At_S0001_A01	20387519	20388869
At_S0001_A01	20774723	20776092
At_S0001_A01	20809648	20810999
At_S0001_A01	20821273	20822627
At_S0001_A01	22089193	22090575
At_S0001_A01	22233299	22231951
At_S0001_A01	22429427	22428060
At_S0001_A01	22438918	22437703
At_S0001_A01	22629892	22631244
At_S0001_A01	22637319	22638660
At_S0001_A01	22689317	22690440
At_S0001_A01	23434255	23435623
At_S0001_A01	23918577	23917501
At_S0001_A01	24054130	24055491
At_S0001_A01	24063413	24064776
At_S0001_A01	24452817	24454185
At_S0001_A01	24465268	24466623
At_S0001_A01	24656189	24654856
At_S0001_A01	24741935	24740592
At_S0001_A01	24750248	24748892
At_S0001_A01	24880897	24879814
At_S0001_A01	25475547	25474484
At_S0001_A01	25518168	25516825
At_S0001_A01	26874447	26873073
At_S0001_A01	26928303	26929380
At_S0001_A01	27221263	27219910
At_S0001_A01	27224137	27222774
At_S0001_A01	27257787	27256419
At_S0001_A01	27358566	27359945
At_S0001_A01	27381759	27383129
At_S0001_A01	27414552	27415618
At_S0001_A01	28173683	28172630
At_S0001_A01	28300497	28299143
At_S0001_A01	28376965	28375622
At_S0001_A01	28414149	28412797
At_S0001_A01	28422224	28421061
At_S0001_A01	28623411	28624778
At_S0001_A01	28629890	28631259
At_S0001_A01	28660821	28659488
At_S0001_A01	28855671	28857011
At_S0001_A01	28937893	28939253
At_S0001_A01	28987037	28985672
At_S0001_A01	29124756	29126108
At_S0001_A01	29553058	29554424
At_S0001_A01	29791282	29789923
At_S0001_A01	29822289	29823659
At_S0001_A01	29853254	29854583
At_S0001_A01	29862722	29863771
At_S0001_A01	30221245	30219890
At_S0001_A01	30231659	30230422
At_S0001_A01	30287947	30289314
At_S0001_A01	31017691	31016631
At_S0001_A01	31137873	31136767
At_S0001_A01	31156666	31155599
At_S0001_A01	31195434	31194067
At_S0001_A01	31203709	31202346
At_S0001_A01	31620161	31621517
At_S0001_A01	32038101	32039459
At_S0001_A01	32056358	32057715
At_S0001_A01	32339821	32338469
At_S0001_A01	32347955	32346624
At_S0001_A01	33612231	33613320
At_S0001_A01	33657113	33655744
At_S0001_A01	34608389	34609749
At_S0001_A01	34616697	34618047
At_S0001_A01	34903686	34902333
At_S0001_A01	35401666	35403005
At_S0001_A01	35415513	35414151
At_S0001_A01	35968677	35967307
At_S0001_A01	35978734	35977370
At_S0001_A01	37405628	37407000
At_S0001_A01	37421811	37423183
At_S0001_A01	37610906	37612270
At_S0001_A01	37619642	37621006
At_S0001_A01	37789816	37791185
At_S0001_A01	37801400	37802754
At_S0001_A01	37809360	37810725
At_S0001_A01	37945158	37946515
At_S0001_A01	37953738	37955079
At_S0001_A01	38010020	38008666
At_S0001_A01	38020185	38018830
At_S0001_A01	38214961	38213598
At_S0001_A01	38309417	38310760
At_S0001_A01	38787874	38786526
At_S0001_A01	38795249	38793893
At_S0001_A01	38867909	38866574
At_S0001_A01	38910249	38911605
At_S0001_A01	39687928	39689263
At_S0001_A01	40081658	40080544
At_S0001_A01	40181281	40182364
At_S0001_A01	40194109	40195192
At_S0001_A01	40985063	40986412
At_S0001_A01	41154936	41156288
At_S0001_A01	41161206	41162543
At_S0001_A01	41764787	41763428
At_S0001_A01	42234250	42235603
At_S0001_A01	42632489	42633836
At_S0001_A01	42645106	42646460
At_S0001_A01	42852728	42854070
At_S0001_A01	42863589	42864912
At_S0001_A01	43015881	43014522
At_S0001_A01	43025064	43023702
At_S0001_A01	43180529	43179187
At_S0001_A01	43195852	43194496
At_S0001_A01	43313446	43312089
At_S0001_A01	43641603	43642686
At_S0001_A01	44472293	44470938
At_S0001_A01	44503471	44502115
At_S0001_A01	44583635	44582309
At_S0001_A01	44584719	44583637
At_S0001_A01	44965175	44966526
At_S0001_A01	45065987	45067351
At_S0001_A01	45806925	45808270
At_S0001_A01	45816931	45815600
At_S0001_A01	45821691	45823056
At_S0001_A01	46365445	46364094
At_S0001_A01	46374321	46372967
At_S0001_A01	46392026	46393397
At_S0001_A01	46715824	46717191
At_S0001_A01	46847100	46845760
At_S0001_A01	46879257	46880624
At_S0001_A01	46899942	46898563
At_S0001_A01	46963579	46962239
At_S0001_A01	47093234	47094584
At_S0001_A01	47153895	47155250
At_S0001_A01	47264976	47266315
At_S0001_A01	47274146	47275524
At_S0001_A01	48240204	48241267
At_S0001_A01	48646983	48645631
At_S0001_A01	48805823	48804463
At_S0001_A01	48833228	48831863
At_S0001_A01	48877730	48879064
At_S0001_A01	48886781	48888125
At_S0001_A01	49156145	49154800
At_S0001_A01	49561723	49560380
At_S0001_A01	49874002	49875322
At_S0001_A01	50011922	50010566
At_S0001_A01	50149095	50150393
At_S0001_A01	50164722	50166089
At_S0001_A01	50228429	50227089
At_S0001_A01	50254961	50256313
At_S0001_A01	50285046	50283686
At_S0001_A01	50621892	50620537
At_S0001_A01	50641136	50639781
At_S0001_A01	51204244	51205611
At_S0001_A01	51212586	51213943
At_S0001_A01	52571278	52569923
At_S0001_A01	52747253	52748320
At_S0001_A01	53577939	53576582
At_S0001_A01	53743624	53744984
At_S0001_A01	53752376	53753734
At_S0001_A01	54105438	54104114
At_S0001_A01	54115796	54114443
At_S0001_A01	54328955	54327606
At_S0001_A01	54336874	54335812
At_S0001_A01	54623942	54625291
At_S0001_A01	54646552	54647801
At_S0001_A01	54773108	54774272
At_S0001_A01	55408339	55406971
At_S0001_A01	55684021	55682655
At_S0001_A01	55692333	55690979
At_S0001_A01	55703386	55702309
At_S0001_A01	56155002	56153666
At_S0001_A01	56168831	56167480
At_S0001_A01	57311708	57310352
At_S0001_A01	57818208	57819543
At_S0001_A01	57953383	57954731
At_S0001_A01	57961000	57962364
At_S0001_A01	58465981	58464640
At_S0001_A01	60461039	60459937
At_S0001_A01	60473783	60472447
At_S0001_A01	61354625	61355973
At_S0001_A01	61415863	61417043
At_S0001_A01	61450644	61452007
At_S0002_A02	1898011	1899276
At_S0002_A02	3659321	3657948
At_S0002_A02	5316485	5317842
At_S0002_A02	5770025	5771373
At_S0002_A02	6489598	6490689
At_S0002_A02	8005720	8007049
At_S0002_A02	8013684	8015020
At_S0002_A02	8867603	8868894
At_S0002_A02	8875633	8876983
At_S0002_A02	8992378	8993721
At_S0002_A02	9000113	9001442
At_S0002_A02	10544550	10545924
At_S0002_A02	10717617	10718983
At_S0002_A02	10740468	10741811
At_S0002_A02	11153331	11152208
At_S0002_A02	11479744	11478376
At_S0002_A02	11814016	11812662
At_S0002_A02	11875035	11873696
At_S0002_A02	12176395	12177757
At_S0002_A02	12182569	12181200
At_S0002_A02	12298300	12299646
At_S0002_A02	12306390	12307741
At_S0002_A02	12522304	12523655
At_S0002_A02	12531250	12532615
At_S0002_A02	13106449	13107807
At_S0002_A02	13115879	13117233
At_S0002_A02	13148387	13149741
At_S0002_A02	13245476	13246838
At_S0002_A02	13260055	13261422
At_S0002_A02	13586130	13587200
At_S0002_A02	13592325	13593674
At_S0002_A02	13923569	13924923
At_S0002_A02	14368055	14366686
At_S0002_A02	14456552	14455192
At_S0002_A02	14771773	14772846
At_S0002_A02	14780826	14782183
At_S0002_A02	15093883	15092529
At_S0002_A02	15129992	15128655
At_S0002_A02	15427242	15428599
At_S0002_A02	15611554	15610197
At_S0002_A02	15625560	15626910
At_S0002_A02	15632779	15631395
At_S0002_A02	15875264	15873922
At_S0002_A02	15878515	15877412
At_S0002_A02	16768140	16769201
At_S0002_A02	16809965	16808872
At_S0002_A02	17033689	17035044
At_S0002_A02	17060904	17059537
At_S0002_A02	17064959	17063720
At_S0002_A02	17087197	17088235
At_S0002_A02	17243359	17242111
At_S0002_A02	17281315	17282673
At_S0002_A02	17327346	17328694
At_S0002_A02	17338083	17339414
At_S0002_A02	17635010	17636384
At_S0002_A02	17784916	17783827
At_S0002_A02	17794714	17796056
At_S0002_A02	17813429	17814579
At_S0002_A02	18146955	18145602
At_S0002_A02	18535212	18536543
At_S0002_A02	18552760	18554106
At_S0002_A02	18602614	18601253
At_S0002_A02	18605966	18604612
At_S0002_A02	18615444	18614091
At_S0002_A02	18618356	18617021
At_S0002_A02	18670667	18672018
At_S0002_A02	19399659	19398303
At_S0002_A02	19412211	19410837
At_S0002_A02	19462787	19463863
At_S0002_A02	19470727	19472093
At_S0002_A02	19784706	19786078
At_S0002_A02	19860329	19858970
At_S0002_A02	19893107	19894452
At_S0002_A02	19981047	19979686
At_S0002_A02	19989213	19987853
At_S0002_A02	20202392	20203645
At_S0002_A02	20734946	20736284
At_S0002_A02	20760265	20761603
At_S0002_A02	20838568	20837218
At_S0002_A02	20849951	20848601
At_S0002_A02	21224789	21226144
At_S0002_A02	21549593	21548234
At_S0002_A02	21637962	21636595
At_S0002_A02	21794985	21796339
At_S0002_A02	25633109	25631742
At_S0002_A02	25659955	25661308
At_S0002_A02	26387236	26388592
At_S0002_A02	27295191	27294124
At_S0002_A02	27630560	27631901
At_S0002_A02	27957507	27956420
At_S0002_A02	27964724	27963397
At_S0002_A02	28387154	28388465
At_S0002_A02	28393428	28394676
At_S0002_A02	29158606	29159971
At_S0002_A02	29606472	29607795
At_S0002_A02	29616689	29618045
At_S0002_A02	30124340	30125415
At_S0002_A02	30133558	30134648
At_S0002_A02	30680496	30681862
At_S0002_A02	31778671	31777314
At_S0002_A02	31781039	31779689
At_S0002_A02	31790542	31789201
At_S0002_A02	32124210	32123089
At_S0002_A02	32130927	32129580
At_S0002_A02	32335567	32334214
At_S0002_A02	32346845	32345506
At_S0002_A02	32746456	32745103
At_S0002_A02	34116420	34115357
At_S0002_A02	34166932	34165570
At_S0002_A02	34175502	34174147
At_S0002_A02	34683059	34681690
At_S0002_A02	34866659	34867757
At_S0002_A02	34968305	34969641
At_S0002_A02	35115568	35114281
At_S0002_A02	35239942	35238572
At_S0002_A02	35248572	35247228
At_S0002_A02	35522313	35520958
At_S0002_A02	35523367	35524725
At_S0002_A02	35580053	35581409
At_S0002_A02	35738250	35739601
At_S0002_A02	36609606	36608257
At_S0002_A02	36928802	36927462
At_S0002_A02	36929539	36930894
At_S0002_A02	36939178	36940551
At_S0002_A02	36940688	36942026
At_S0002_A02	37079644	37080712
At_S0002_A02	37102548	37101468
At_S0002_A02	37105087	37106423
At_S0002_A02	37111495	37112861
At_S0002_A02	37321021	37319699
At_S0002_A02	37377605	37378956
At_S0002_A02	37389996	37391357
At_S0002_A02	38099569	38098256
At_S0002_A02	38235794	38237153
At_S0002_A02	38250364	38251707
At_S0002_A02	40598772	40599848
At_S0002_A02	40614819	40615885
At_S0002_A02	40626938	40625881
At_S0002_A02	40697098	40695731
At_S0002_A02	40810773	40809463
At_S0002_A02	40963920	40962554
At_S0002_A02	41067221	41068560
At_S0002_A02	41074955	41076307
At_S0002_A02	41143895	41145234
At_S0002_A02	41940611	41941824
At_S0002_A02	41951148	41952393
At_S0002_A02	42736405	42735037
At_S0002_A02	43027458	43026122
At_S0002_A02	43466198	43467511
At_S0002_A02	43497539	43496187
At_S0002_A02	43689737	43691102
At_S0002_A02	43784631	43785982
At_S0002_A02	45009839	45011092
At_S0002_A02	45413739	45412396
At_S0002_A02	45422597	45421228
At_S0002_A02	45515944	45514572
At_S0002_A02	45524441	45523071
At_S0002_A02	45968454	45969798
At_S0002_A02	45977423	45978773
At_S0002_A02	46212261	46213607
At_S0002_A02	46223267	46221918
At_S0002_A02	47124987	47123634
At_S0002_A02	47133541	47132185
At_S0002_A02	48080085	48078734
At_S0002_A02	48089311	48087944
At_S0002_A02	48223543	48224893
At_S0002_A02	49017345	49018691
At_S0002_A02	49061996	49060632
At_S0002_A02	51120322	51119229
At_S0002_A02	51128680	51127614
At_S0002_A02	51355392	51356746
At_S0002_A02	52125505	52124138
At_S0002_A02	52133756	52132382
At_S0002_A02	52492098	52493444
At_S0002_A02	52829955	52828599
At_S0002_A02	52839404	52838055
At_S0002_A02	52927974	52926618
At_S0002_A02	52936878	52935510
At_S0002_A02	54162949	54164014
At_S0002_A02	55464171	55462815
At_S0002_A02	55701088	55699740
At_S0002_A02	55711668	55710303
At_S0002_A02	55778837	55777775
At_S0002_A02	55984881	55983535
At_S0002_A02	56497402	56498751
At_S0002_A02	56724019	56722674
At_S0002_A02	56736895	56735530
At_S0002_A02	57088893	57090242
At_S0002_A02	57192307	57193663
At_S0002_A02	57715213	57716572
At_S0002_A02	58377377	58376011
At_S0002_A02	58383557	58382417
At_S0002_A02	59445407	59444040
At_S0002_A02	59542952	59544304
At_S0002_A02	59835054	59836135
At_S0002_A02	60091566	60092934
At_S0002_A02	60480482	60479146
At_S0002_A02	60493227	60491885
At_S0002_A02	60875207	60876272
At_S0002_A02	60925556	60926858
At_S0002_A02	61461742	61460373
At_S0002_A02	61469929	61468577
At_S0002_A02	61495001	61496370
At_S0002_A02	61503245	61504602
At_S0002_A02	62625571	62626910
At_S0002_A02	64465531	64466606
At_S0002_A02	64549585	64550916
At_S0002_A02	65161317	65160023
At_S0002_A02	65442107	65440738
At_S0002_A02	65495658	65496982
At_S0002_A02	65512926	65514202
At_S0002_A02	65891611	65890261
At_S0002_A02	66463712	66462455
At_S0002_A02	66477631	66478996
At_S0002_A02	66800615	66801898
At_S0002_A02	66948644	66950095
At_S0002_A02	67065618	67064280
At_S0002_A02	68204180	68205532
At_S0002_A02	68344143	68342776
At_S0002_A02	68353141	68351781
At_S0002_A02	69521128	69519779
At_S0002_A02	69554418	69553071
At_S0002_A02	69564035	69562663
At_S0002_A02	69661486	69662577
At_S0002_A02	69669837	69671204
At_S0002_A02	70064632	70065992
At_S0002_A02	70339573	70340926
At_S0002_A02	70348453	70349806
At_S0002_A02	71434099	71435437
At_S0002_A02	71444251	71445592
At_S0002_A02	71731807	71730439
At_S0002_A02	71918864	71920216
At_S0002_A02	72191385	72192450
At_S0002_A02	72487840	72486516
At_S0002_A02	72496472	72495102
At_S0002_A02	73566670	73568037
At_S0002_A02	75166951	75165585
At_S0002_A02	75727650	75728746
At_S0002_A02	75817458	75816093
At_S0002_A02	75824594	75823226
At_S0002_A02	75968256	75967144
At_S0002_A02	76046802	76047867
At_S0002_A02	76541198	76542526
At_S0002_A02	76636919	76638285
At_S0002_A02	76644976	76646320
At_S0002_A02	77020840	77022199
At_S0002_A02	77062376	77063732
At_S0002_A02	77096887	77097950
At_S0002_A02	77099316	77097967
At_S0002_A02	77107113	77108463
At_S0002_A02	77193487	77192293
At_S0002_A02	77205869	77207227
At_S0002_A02	77302029	77303354
At_S0002_A02	78479128	78477751
At_S0002_A02	78487375	78486003
At_S0002_A02	79490086	79488731
At_S0002_A02	79758993	79757635
At_S0002_A02	79805960	79807270
At_S0002_A02	79815156	79816476
At_S0002_A02	79820625	79819272
At_S0002_A02	80943965	80945331
At_S0002_A02	80959900	80961284
At_S0002_A02	81142878	81141522
At_S0002_A02	82312019	82310870
At_S0002_A02	82852305	82850964
At_S0002_A02	82862063	82860697
At_S0002_A02	82948003	82949367
At_S0002_A02	82956183	82957536
At_S0002_A02	82961858	82963222
At_S0002_A02	83512838	83514187
At_S0002_A02	83518567	83519932
At_S0002_A02	83578169	83579256
At_S0002_A02	85480819	85479476
At_S0002_A02	85664106	85665471
At_S0002_A02	85674896	85676252
At_S0002_A02	86096573	86095228
At_S0002_A02	87501719	87500383
At_S0002_A02	87510674	87509441
At_S0002_A02	88044186	88042819
At_S0002_A02	88733713	88732485
At_S0002_A02	88735770	88734406
At_S0002_A02	88965818	88964466
At_S0002_A02	88995936	88994601
At_S0002_A02	89005653	89006796
At_S0002_A02	89013481	89014646
At_S0002_A02	89523593	89522509
At_S0002_A02	89751893	89750555
At_S0002_A02	89819972	89818625
At_S0002_A02	89837383	89836020
At_S0002_A02	89850410	89849057
At_S0002_A02	89869972	89868605
At_S0002_A02	89977758	89976404
At_S0002_A02	90150078	90151155
At_S0002_A02	90158437	90159535
At_S0002_A02	90172906	90171542
At_S0002_A02	90309642	90308289
At_S0002_A02	91655016	91656085
At_S0002_A02	91717498	91716129
At_S0002_A02	91724729	91723361
At_S0002_A02	91927616	91926272
At_S0002_A02	91943734	91942383
At_S0002_A02	92334382	92335736
At_S0002_A02	92368517	92367146
At_S0002_A02	92598800	92597442
At_S0002_A02	92666169	92664840
At_S0002_A02	92690631	92689403
At_S0002_A02	92699675	92698452
At_S0002_A02	92792988	92794057
At_S0002_A02	92802823	92801490
At_S0002_A02	93229824	93230889
At_S0002_A02	93503698	93502361
At_S0002_A02	93925973	93927344
At_S0002_A02	97192330	97191223
At_S0003_A03	6163914	6162560
At_S0003_A03	6206341	6207679
At_S0003_A03	6406945	6408311
At_S0003_A03	8197802	8199159
At_S0003_A03	8204851	8206152
At_S0003_A03	8713298	8714663
At_S0003_A03	8722921	8724285
At_S0003_A03	9869223	9870578
At_S0003_A03	10078661	10077307
At_S0003_A03	10129116	10127770
At_S0003_A03	10136868	10135529
At_S0003_A03	10142073	10141023
At_S0003_A03	10148868	10147514
At_S0003_A03	10152236	10150868
At_S0003_A03	10206921	10205565
At_S0003_A03	10213302	10211946
At_S0003_A03	10245290	10243923
At_S0003_A03	10276886	10278234
At_S0003_A03	10285650	10286837
At_S0003_A03	10410896	10412247
At_S0003_A03	10423288	10424656
At_S0003_A03	10431090	10432457
At_S0003_A03	10453814	10452514
At_S0003_A03	10477135	10475766
At_S0003_A03	10486916	10485541
At_S0003_A03	10499832	10498466
At_S0003_A03	10539455	10538126
At_S0003_A03	10633851	10634932
At_S0003_A03	10761158	10762515
At_S0003_A03	10770584	10771942
At_S0003_A03	10850531	10849354
At_S0003_A03	10858852	10857498
At_S0003_A03	10942524	10943602
At_S0003_A03	10971649	10973018
At_S0003_A03	11195458	11196547
At_S0003_A03	12061207	12059865
At_S0003_A03	12071667	12070335
At_S0003_A03	12086735	12088087
At_S0003_A03	12091479	12092569
At_S0003_A03	12103711	12102362
At_S0003_A03	12237515	12238755
At_S0003_A03	12327590	12328971
At_S0003_A03	12335815	12337168
At_S0003_A03	12561224	12562572
At_S0003_A03	12571505	12570153
At_S0003_A03	13057614	13056516
At_S0003_A03	13412694	13414084
At_S0003_A03	14349107	14350184
At_S0003_A03	14410126	14409051
At_S0003_A03	14456467	14457819
At_S0003_A03	14576885	14578220
At_S0003_A03	14736886	14738251
At_S0003_A03	14821782	14820422
At_S0003_A03	14830687	14829330
At_S0003_A03	14970773	14969677
At_S0003_A03	15408147	15409511
At_S0003_A03	15501288	15502652
At_S0003_A03	15556158	15557525
At_S0003_A03	15661330	15662696
At_S0003_A03	15794436	15795798
At_S0003_A03	15880659	15881722
At_S0003_A03	15998780	16000085
At_S0003_A03	16523089	16521735
At_S0003_A03	16947970	16946885
At_S0003_A03	16959174	16958089
At_S0003_A03	17115275	17113912
At_S0003_A03	17130375	17129029
At_S0003_A03	18041404	18040050
At_S0003_A03	18529201	18527848
At_S0003_A03	18610366	18611721
At_S0003_A03	20442790	20444139
At_S0003_A03	20456103	20457451
At_S0003_A03	21076575	21077914
At_S0003_A03	22334808	22333453
At_S0003_A03	22346317	22345176
At_S0003_A03	22407541	22406174
At_S0003_A03	22413853	22412501
At_S0003_A03	22623077	22621713
At_S0003_A03	23166627	23167770
At_S0003_A03	23391346	23390207
At_S0003_A03	23545703	23544482
At_S0003_A03	23555901	23554544
At_S0003_A03	23582746	23581381
At_S0003_A03	23610989	23609799
At_S0003_A03	23666243	23664904
At_S0003_A03	23677774	23676404
At_S0003_A03	23698332	23699685
At_S0003_A03	23928721	23927366
At_S0003_A03	23940637	23939282
At_S0003_A03	24210680	24209328
At_S0003_A03	24218778	24217422
At_S0003_A03	24227903	24226542
At_S0003_A03	24231867	24230785
At_S0003_A03	24667326	24668695
At_S0003_A03	24916737	24918102
At_S0003_A03	24927784	24929133
At_S0003_A03	25216749	25215402
At_S0003_A03	25243981	25245329
At_S0003_A03	25256935	25258291
At_S0003_A03	25273870	25272509
At_S0003_A03	25274938	25276230
At_S0003_A03	25548110	25549172
At_S0003_A03	25843803	25845143
At_S0003_A03	25874500	25875834
At_S0003_A03	25941486	25940138
At_S0003_A03	26020845	26019476
At_S0003_A03	26027313	26025956
At_S0003_A03	26062922	26061567
At_S0003_A03	26257387	26256017
At_S0003_A03	26605661	26606882
At_S0003_A03	27011632	27012995
At_S0003_A03	27023571	27024935
At_S0003_A03	27185341	27183988
At_S0003_A03	27193639	27192286
At_S0003_A03	27819231	27820564
At_S0003_A03	28012949	28011580
At_S0003_A03	28330229	28328871
At_S0003_A03	28552023	28550674
At_S0003_A03	29065177	29063838
At_S0003_A03	29496440	29495102
At_S0003_A03	29505518	29504142
At_S0003_A03	29554498	29553168
At_S0003_A03	30283489	30282138
At_S0003_A03	30783933	30782598
At_S0003_A03	30890426	30889059
At_S0003_A03	30892109	30890745
At_S0003_A03	30907958	30909297
At_S0003_A03	30924359	30923178
At_S0003_A03	32738945	32740052
At_S0003_A03	33498469	33499683
At_S0003_A03	33546197	33544863
At_S0003_A03	35307147	35305843
At_S0003_A03	35310838	35312137
At_S0003_A03	35317281	35318632
At_S0003_A03	35322838	35323970
At_S0003_A03	35453175	35454521
At_S0003_A03	37164864	37166239
At_S0003_A03	37177262	37178400
At_S0003_A03	37693164	37691798
At_S0003_A03	37818495	37817176
At_S0003_A03	37819999	37818666
At_S0003_A03	37829224	37827879
At_S0003_A03	37937372	37936022
At_S0003_A03	38255196	38256564
At_S0003_A03	38267528	38268667
At_S0003_A03	38275689	38277053
At_S0003_A03	39471471	39472848
At_S0003_A03	40336682	40335347
At_S0003_A03	40347198	40345848
At_S0003_A03	40450325	40448957
At_S0003_A03	40696393	40695041
At_S0003_A03	41959953	41958613
At_S0003_A03	41971641	41970310
At_S0003_A03	42489521	42488162
At_S0003_A03	43139496	43140719
At_S0003_A03	43148651	43149813
At_S0003_A03	43430364	43431730
At_S0003_A03	43679877	43678783
At_S0003_A03	43699592	43698229
At_S0003_A03	43703394	43702316
At_S0003_A03	43710349	43708995
At_S0003_A03	43713671	43714743
At_S0003_A03	44824702	44823357
At_S0003_A03	46332572	46331222
At_S0003_A03	46972727	46974081
At_S0003_A03	46995629	46996970
At_S0003_A03	48264076	48265142
At_S0003_A03	48512362	48511018
At_S0003_A03	49131380	49132592
At_S0003_A03	49400186	49401557
At_S0003_A03	49416891	49415805
At_S0003_A03	49427916	49426644
At_S0003_A03	49438622	49437271
At_S0003_A03	49637579	49636215
At_S0003_A03	51224237	51222872
At_S0003_A03	51232925	51231750
At_S0003_A03	52018813	52017477
At_S0003_A03	52180669	52179314
At_S0003_A03	52483617	52484694
At_S0003_A03	52492969	52494047
At_S0003_A03	53018106	53019456
At_S0003_A03	53154312	53155674
At_S0003_A03	53162575	53163925
At_S0003_A03	53187869	53188924
At_S0003_A03	53203828	53204908
At_S0003_A03	53988507	53987137
At_S0003_A03	54082790	54084145
At_S0003_A03	54092972	54094335
At_S0003_A03	54904802	54903453
At_S0003_A03	55002067	55000701
At_S0003_A03	55989473	55990792
At_S0003_A03	56002955	56004310
At_S0003_A03	56478340	56479685
At_S0003_A03	56487215	56488567
At_S0003_A03	57407257	57408367
At_S0003_A03	57514208	57512867
At_S0003_A03	57523353	57521996
At_S0003_A03	57557194	57556120
At_S0003_A03	58188745	58187366
At_S0003_A03	58801755	58803093
At_S0003_A03	58912103	58913310
At_S0003_A03	58969899	58971231
At_S0003_A03	60261368	60260014
At_S0003_A03	60269373	60268008
At_S0003_A03	61056570	61057906
At_S0003_A03	61334177	61335544
At_S0003_A03	61337298	61338665
At_S0003_A03	61533903	61534971
At_S0003_A03	61810768	61812129
At_S0003_A03	62789613	62788263
At_S0003_A03	62822913	62821542
At_S0003_A03	62830962	62829599
At_S0003_A03	63987506	63988819
At_S0003_A03	64029352	64030709
At_S0003_A03	64304377	64305732
At_S0003_A03	64785111	64783757
At_S0003_A03	64798065	64796900
At_S0003_A03	64986626	64985257
At_S0003_A03	65002510	65001143
At_S0003_A03	67583044	67581689
At_S0003_A03	67901996	67903356
At_S0003_A03	68343441	68342085
At_S0003_A03	68437746	68436393
At_S0003_A03	68445965	68444600
At_S0003_A03	69089502	69090846
At_S0003_A03	69260295	69261420
At_S0003_A03	69487749	69489116
At_S0003_A03	70598265	70599595
At_S0003_A03	70604435	70605802
At_S0003_A03	70635995	70637075
At_S0003_A03	70907025	70905663
At_S0003_A03	70916227	70914990
At_S0003_A03	71106852	71108173
At_S0003_A03	71116270	71117573
At_S0003_A03	71612289	71613623
At_S0003_A03	72247983	72246617
At_S0003_A03	72424650	72423341
At_S0003_A03	72953078	72951706
At_S0003_A03	73226241	73227608
At_S0003_A03	73905587	73904230
At_S0003_A03	74011809	74013175
At_S0003_A03	74305948	74304563
At_S0003_A03	74327504	74326148
At_S0003_A03	74518334	74516977
At_S0003_A03	74700559	74701909
At_S0003_A03	74709284	74710636
At_S0003_A03	74811152	74812479
At_S0003_A03	74857757	74859123
At_S0003_A03	75934518	75933439
At_S0003_A03	76032351	76030982
At_S0003_A03	76121898	76120544
At_S0003_A03	76283134	76281779
At_S0003_A03	77496388	77495037
At_S0003_A03	77533373	77534734
At_S0003_A03	77848985	77850344
At_S0003_A03	77862410	77863561
At_S0003_A03	79014293	79015440
At_S0003_A03	79565113	79566205
At_S0003_A03	79917462	79918833
At_S0003_A03	80377139	80378493
At_S0003_A03	80581799	80580442
At_S0003_A03	80588199	80586842
At_S0003_A03	80844080	80845431
At_S0003_A03	80850482	80851844
At_S0003_A03	80880127	80878758
At_S0003_A03	82113067	82111720
At_S0003_A03	82121705	82120365
At_S0003_A03	82266187	82267556
At_S0003_A03	82276821	82278177
At_S0003_A03	82285769	82287139
At_S0003_A03	82656478	82655117
At_S0003_A03	82677044	82675669
At_S0003_A03	82683290	82681927
At_S0003_A03	83069058	83067987
At_S0003_A03	83275087	83276440
At_S0003_A03	83439457	83438124
At_S0003_A03	83448470	83447100
At_S0003_A03	83965329	83963979
At_S0003_A03	84548194	84549558
At_S0003_A03	84556856	84558223
At_S0003_A03	84611957	84613326
At_S0003_A03	84626809	84628142
At_S0003_A03	84850093	84848739
At_S0003_A03	84866892	84865619
At_S0003_A03	85716580	85715442
At_S0003_A03	85776514	85777872
At_S0003_A03	86810618	86809553
At_S0003_A03	87569113	87567738
At_S0003_A03	88117343	88115990
At_S0003_A03	88125055	88123869
At_S0003_A03	88992715	88991358
At_S0003_A03	89121634	89120293
At_S0003_A03	89154430	89155781
At_S0003_A03	89729775	89731125
At_S0003_A03	90638319	90636969
At_S0003_A03	90729454	90730770
At_S0003_A03	90733576	90734942
At_S0003_A03	91453080	91451728
At_S0003_A03	91498489	91499813
At_S0003_A03	91503192	91501825
At_S0003_A03	91520358	91521394
At_S0003_A03	91533556	91532206
At_S0003_A03	91699601	91698270
At_S0003_A03	92218832	92220186
At_S0003_A03	92224729	92226084
At_S0003_A03	92597988	92599345
At_S0003_A03	92776573	92775206
At_S0003_A03	93176355	93174989
At_S0003_A03	93404735	93403402
At_S0003_A03	93408491	93407143
At_S0003_A03	93418884	93417634
At_S0003_A03	93689407	93688052
At_S0003_A03	93747384	93746088
At_S0003_A03	93753806	93752440
At_S0003_A03	94305011	94306366
At_S0003_A03	95047084	95048418
At_S0003_A03	95056157	95057330
At_S0003_A03	95634687	95636052
At_S0003_A03	95934844	95936196
At_S0003_A03	96380294	96381654
At_S0003_A03	96388499	96389830
At_S0003_A03	96546688	96548041
At_S0003_A03	97785435	97784083
At_S0003_A03	97793918	97792554
At_S0003_A03	97844768	97843408
At_S0003_A03	99923121	99924478
At_S0004_A04	2352287	2350943
At_S0004_A04	2391104	2389741
At_S0004_A04	2478931	2477583
At_S0004_A04	2538283	2537200
At_S0004_A04	3210677	3209611
At_S0004_A04	3228200	3227132
At_S0004_A04	4351292	4349937
At_S0004_A04	6463197	6461841
At_S0004_A04	6470201	6468877
At_S0004_A04	8347034	8348327
At_S0004_A04	8520313	8519153
At_S0004_A04	8936555	8935488
At_S0004_A04	8939720	8938671
At_S0004_A04	9187510	9186248
At_S0004_A04	9847135	9845871
At_S0004_A04	11289707	11291059
At_S0004_A04	11501090	11502423
At_S0004_A04	11510609	11511964
At_S0004_A04	12011330	12012678
At_S0004_A04	12832744	12834110
At_S0004_A04	12838329	12839697
At_S0004_A04	13798747	13797405
At_S0004_A04	13809123	13810455
At_S0004_A04	13843732	13845074
At_S0004_A04	14546061	14544711
At_S0004_A04	14677887	14679237
At_S0004_A04	14908082	14909450
At_S0004_A04	14923845	14925177
At_S0004_A04	14936562	14937903
At_S0004_A04	15697471	15696121
At_S0004_A04	18065358	18066727
At_S0004_A04	18078378	18079732
At_S0004_A04	19405099	19404000
At_S0004_A04	20822399	20821172
At_S0004_A04	20834416	20833074
At_S0004_A04	20934251	20932884
At_S0004_A04	20948818	20947473
At_S0004_A04	21035630	21036999
At_S0004_A04	21873391	21872038
At_S0004_A04	22227251	22225897
At_S0004_A04	22232747	22231395
At_S0004_A04	22358035	22356681
At_S0004_A04	23979574	23980931
At_S0004_A04	23987842	23989184
At_S0004_A04	24638369	24639721
At_S0004_A04	25100142	25098790
At_S0004_A04	25135094	25133946
At_S0004_A04	25272115	25270851
At_S0004_A04	25436326	25437613
At_S0004_A04	25444000	25445366
At_S0004_A04	25710636	25711980
At_S0004_A04	26284070	26282706
At_S0004_A04	26321833	26323178
At_S0004_A04	27046170	27047241
At_S0004_A04	27095635	27094252
At_S0004_A04	27108583	27107273
At_S0004_A04	27158579	27157516
At_S0004_A04	27790414	27791767
At_S0004_A04	27816914	27818259
At_S0004_A04	27856134	27854812
At_S0004_A04	29018634	29019699
At_S0004_A04	29750799	29749431
At_S0004_A04	29755423	29754084
At_S0004_A04	29762722	29761396
At_S0004_A04	30046177	30047542
At_S0004_A04	30054485	30055808
At_S0004_A04	31146281	31147651
At_S0004_A04	32074831	32073607
At_S0004_A04	32088656	32089724
At_S0004_A04	32131554	32130185
At_S0004_A04	32982989	32984305
At_S0004_A04	33096726	33097824
At_S0004_A04	33204439	33205786
At_S0004_A04	33213357	33214713
At_S0004_A04	33810304	33811654
At_S0004_A04	33819792	33821147
At_S0004_A04	33856947	33855583
At_S0004_A04	34309848	34308499
At_S0004_A04	34725100	34723734
At_S0004_A04	34734911	34733557
At_S0004_A04	34882436	34881086
At_S0004_A04	34960444	34961798
At_S0004_A04	35477403	35476300
At_S0004_A04	35723125	35721761
At_S0004_A04	35809710	35811078
At_S0004_A04	36099624	36100987
At_S0004_A04	36106002	36107331
At_S0004_A04	36606721	36605349
At_S0004_A04	36739821	36740906
At_S0004_A04	36747622	36746251
At_S0004_A04	37958133	37956803
At_S0004_A04	37966655	37965307
At_S0004_A04	38151183	38149825
At_S0004_A04	38599781	38598692
At_S0004_A04	38639674	38641010
At_S0004_A04	38747818	38749199
At_S0004_A04	38756175	38757557
At_S0004_A04	38911849	38913176
At_S0004_A04	38937606	38938932
At_S0004_A04	40259081	40257727
At_S0004_A04	41411614	41410258
At_S0004_A04	41421079	41419710
At_S0004_A04	42325973	42324615
At_S0004_A04	42641209	42639861
At_S0004_A04	42654915	42653792
At_S0004_A04	42813296	42814532
At_S0004_A04	42820622	42821688
At_S0004_A04	42834191	42835258
At_S0004_A04	42839733	42841086
At_S0004_A04	42846468	42847818
At_S0004_A04	43106018	43104669
At_S0004_A04	43107836	43109210
At_S0004_A04	43192959	43194317
At_S0004_A04	44089422	44088068
At_S0004_A04	44097106	44095751
At_S0004_A04	44179735	44180804
At_S0004_A04	44203989	44205034
At_S0004_A04	44213354	44214708
At_S0004_A04	44325248	44323910
At_S0004_A04	44328653	44327308
At_S0004_A04	44337727	44336391
At_S0004_A04	44481356	44480233
At_S0004_A04	44525394	44524044
At_S0004_A04	44531491	44530152
At_S0004_A04	44733022	44734379
At_S0004_A04	45010594	45011962
At_S0004_A04	45737642	45738987
At_S0004_A04	45948002	45946689
At_S0004_A04	46994152	46995504
At_S0004_A04	47052350	47053506
At_S0004_A04	47430105	47428743
At_S0004_A04	47582678	47581322
At_S0004_A04	47610480	47611814
At_S0004_A04	47617554	47618884
At_S0004_A04	49738295	49739575
At_S0004_A04	50021726	50020576
At_S0004_A04	50037637	50036285
At_S0004_A04	50279598	50278295
At_S0004_A04	51216290	51215145
At_S0004_A04	51243878	51242515
At_S0004_A04	51270859	51272189
At_S0004_A04	51342545	51341181
At_S0004_A04	51349646	51348298
At_S0004_A04	51369177	51367810
At_S0004_A04	51439137	51437781
At_S0004_A04	51445535	51444171
At_S0004_A04	51591670	51590317
At_S0004_A04	51756293	51754966
At_S0004_A04	52361311	52362679
At_S0004_A04	52387914	52386859
At_S0004_A04	52868453	52867095
At_S0004_A04	53115205	53116295
At_S0004_A04	53122288	53123625
At_S0004_A04	53321522	53320168
At_S0004_A04	53771258	53772610
At_S0004_A04	53957614	53956280
At_S0004_A04	53965978	53964624
At_S0004_A04	54037309	54035955
At_S0004_A04	54044639	54043285
At_S0004_A04	54413990	54415338
At_S0004_A04	55383980	55382912
At_S0004_A04	55429077	55430429
At_S0004_A04	55469955	55468595
At_S0004_A04	55674156	55675528
At_S0004_A04	55861299	55859943
At_S0004_A04	55880510	55879140
At_S0004_A04	56134003	56135374
At_S0004_A04	56342019	56340661
At_S0004_A04	56722428	56721072
At_S0004_A04	56779777	56778412
At_S0004_A04	56805741	56804374
At_S0004_A04	56877061	56875972
At_S0004_A04	56886302	56885214
At_S0004_A04	57182885	57184245
At_S0004_A04	57189171	57190535
At_S0004_A04	57231290	57232595
At_S0004_A04	58170427	58171780
At_S0004_A04	58259990	58261356
At_S0004_A04	58383310	58384697
At_S0004_A04	58392518	58393889
At_S0004_A04	58608378	58609714
At_S0004_A04	58628212	58629564
At_S0004_A04	58956941	58958285
At_S0004_A04	59273938	59272580
At_S0004_A04	59491385	59492737
At_S0004_A04	59499615	59500968
At_S0004_A04	59668683	59670030
At_S0004_A04	59986358	59987736
At_S0004_A04	59994640	59995976
At_S0004_A04	60013590	60012235
At_S0004_A04	60027533	60026168
At_S0004_A04	60108340	60109704
At_S0004_A04	60114631	60115992
At_S0004_A04	60168740	60167381
At_S0004_A04	60177065	60176014
At_S0004_A04	60353523	60352158
At_S0004_A04	60362281	60360932
At_S0004_A04	60450118	60448988
At_S0004_A04	60458724	60457367
At_S0004_A04	60711079	60709714
At_S0004_A04	60722192	60720828
At_S0004_A04	61400444	61401576
At_S0004_A04	61640463	61641832
At_S0004_A04	61643982	61645319
At_S0004_A04	61668479	61669820
At_S0004_A04	61733724	61734790
At_S0004_A04	61790641	61792010
At_S0004_A04	62079059	62080411
At_S0004_A04	62087598	62088965
At_S0004_A04	62095551	62096918
At_S0004_A04	62104310	62105662
At_S0004_A04	62521614	62522990
At_S0004_A04	62571946	62573051
At_S0004_A04	63004197	63005290
At_S0004_A04	63285093	63283739
At_S0004_A04	63293993	63292633
At_S0004_A04	63308395	63309737
At_S0004_A04	63313800	63315169
At_S0004_A04	63349817	63348757
At_S0004_A04	63597791	63599156
At_S0004_A04	63728626	63727272
At_S0004_A04	63915191	63913890
At_S0004_A04	64225040	64223687
At_S0004_A04	64432349	64430978
At_S0004_A04	64638725	64640095
At_S0004_A04	64648325	64649691
At_S0004_A04	64846101	64844898
At_S0004_A04	64857869	64856515
At_S0004_A04	64911033	64909856
At_S0004_A04	64943223	64941896
At_S0004_A04	65166633	65165286
At_S0004_A04	65223115	65221761
At_S0004_A04	65332896	65331527
At_S0004_A04	65460716	65462084
At_S0004_A04	65631529	65632596
At_S0004_A04	65644484	65645836
At_S0004_A04	65750236	65751589
At_S0004_A04	65758346	65759710
At_S0004_A04	65932400	65931043
At_S0004_A04	65934999	65933645
At_S0004_A04	65946530	65945178
At_S0004_A04	66266575	66265221
At_S0004_A04	66274837	66273505
At_S0004_A04	66290283	66289179
At_S0004_A04	66302360	66303706
At_S0004_A04	66446251	66447607
At_S0004_A04	66455113	66456443
At_S0004_A04	66475185	66473836
At_S0004_A04	66490920	66489575
At_S0004_A04	66627434	66626077
At_S0004_A04	66886894	66888230
At_S0004_A04	67013121	67014462
At_S0004_A04	67021900	67023259
At_S0004_A04	67886599	67887965
At_S0004_A04	68512362	68513687
At_S0004_A04	68518713	68520072
At_S0004_A04	68900433	68901782
At_S0004_A04	68901997	68903342
At_S0004_A04	68909698	68911043
At_S0004_A04	68996683	68998032
At_S0004_A04	69003460	69004794
At_S0004_A04	69012209	69013560
At_S0004_A04	69115246	69114014
At_S0004_A04	69346776	69348127
At_S0004_A04	69486676	69485315
At_S0004_A04	69982466	69981098
At_S0004_A04	69990781	69989413
At_S0004_A04	70005047	70006416
At_S0004_A04	70012376	70011045
At_S0004_A04	70016819	70018191
At_S0004_A04	70077077	70078140
At_S0004_A04	70086994	70088057
At_S0004_A04	70150352	70149147
At_S0004_A04	71542054	71540682
At_S0004_A04	72211828	72213193
At_S0004_A04	72613842	72614924
At_S0004_A04	72817917	72819207
At_S0004_A04	72827027	72828380
At_S0004_A04	73046732	73045396
At_S0004_A04	73054832	73053498
At_S0004_A04	73233624	73232258
At_S0004_A04	73363021	73361824
At_S0004_A04	73380343	73381716
At_S0004_A04	73764002	73765075
At_S0004_A04	73766443	73765206
At_S0004_A04	74037032	74035667
At_S0004_A04	74120209	74121565
At_S0004_A04	74242156	74240798
At_S0004_A04	74423692	74422324
At_S0004_A04	74431940	74430581
At_S0004_A04	75246265	75247618
At_S0004_A04	75344934	75346303
At_S0004_A04	75796381	75795009
At_S0004_A04	75802843	75801761
At_S0005_A05	1662264	1663638
At_S0005_A05	16196684	16195596
At_S0005_A05	19154664	19153490
At_S0005_A05	19163033	19161696
At_S0005_A05	22423434	22422090
At_S0005_A05	22432982	22431623
At_S0005_A05	22436706	22437792
At_S0005_A05	23392047	23390700
At_S0005_A05	23401133	23399795
At_S0005_A05	23766677	23767755
At_S0005_A05	23781983	23780638
At_S0005_A05	23814773	23813519
At_S0005_A05	23839714	23841062
At_S0005_A05	30874942	30873670
At_S0005_A05	30883680	30882326
At_S0005_A05	30923699	30922344
At_S0005_A05	30944017	30942672
At_S0005_A05	30952149	30950791
At_S0005_A05	31901195	31902549
At_S0005_A05	31909152	31910508
At_S0005_A05	31923191	31921819
At_S0005_A05	31932479	31931127
At_S0005_A05	32189116	32187775
At_S0005_A05	32401147	32402270
At_S0005_A05	34933245	34931878
At_S0005_A05	34947014	34945674
At_S0005_A05	35142591	35141232
At_S0005_A05	36345297	36343956
At_S0005_A05	37194193	37195546
At_S0005_A05	38085643	38086775
At_S0005_A05	38088883	38087530
At_S0005_A05	39175507	39174140
At_S0005_A05	39183972	39182605
At_S0005_A05	39697456	39696105
At_S0005_A05	39705539	39704372
At_S0005_A05	40125703	40124374
At_S0005_A05	40299964	40301027
At_S0005_A05	40378624	40379979
At_S0005_A05	40914152	40915524
At_S0005_A05	40921358	40922603
At_S0005_A05	41058602	41057540
At_S0005_A05	41154621	41155980
At_S0005_A05	41161696	41163032
At_S0005_A05	41427308	41428677
At_S0005_A05	41444974	41446325
At_S0005_A05	41451565	41452927
At_S0005_A05	41774233	41775572
At_S0005_A05	41782468	41783808
At_S0005_A05	41857241	41855926
At_S0005_A05	41867971	41866619
At_S0005_A05	42418596	42419943
At_S0005_A05	42427126	42428476
At_S0005_A05	42469547	42470896
At_S0005_A05	42477907	42479261
At_S0005_A05	42655975	42654757
At_S0005_A05	42692180	42690817
At_S0005_A05	42796771	42798127
At_S0005_A05	42829499	42830860
At_S0005_A05	42959426	42958059
At_S0005_A05	43153406	43152053
At_S0005_A05	43160848	43159500
At_S0005_A05	43167565	43166256
At_S0005_A05	43438057	43439416
At_S0005_A05	43447178	43448467
At_S0005_A05	43730274	43731627
At_S0005_A05	44189044	44187680
At_S0005_A05	44208535	44209885
At_S0005_A05	44229932	44228582
At_S0005_A05	44233662	44234896
At_S0005_A05	44242208	44243563
At_S0005_A05	44254397	44255756
At_S0005_A05	44263170	44264528
At_S0005_A05	44289836	44288470
At_S0005_A05	44303013	44304250
At_S0005_A05	44307274	44308641
At_S0005_A05	44315533	44316888
At_S0005_A05	44832303	44830953
At_S0005_A05	44833493	44832314
At_S0005_A05	45532564	45531227
At_S0005_A05	45556739	45555398
At_S0005_A05	45565413	45564074
At_S0005_A05	45826704	45825338
At_S0005_A05	45921010	45922331
At_S0005_A05	46276272	46277629
At_S0005_A05	46288529	46289892
At_S0005_A05	46328502	46327232
At_S0005_A05	46378560	46379903
At_S0005_A05	46859345	46860700
At_S0005_A05	46885189	46886544
At_S0005_A05	47092130	47093270
At_S0005_A05	47096593	47097773
At_S0005_A05	47257270	47258614
At_S0005_A05	47405642	47404438
At_S0005_A05	47469318	47470674
At_S0005_A05	47604113	47602940
At_S0005_A05	47663350	47664704
At_S0005_A05	47675164	47676517
At_S0005_A05	47682273	47683625
At_S0005_A05	47691237	47692602
At_S0005_A05	47914934	47916005
At_S0005_A05	48042116	48040759
At_S0005_A05	48113399	48114464
At_S0005_A05	48153151	48151822
At_S0005_A05	48557252	48556119
At_S0005_A05	48566822	48565676
At_S0005_A05	48737191	48738545
At_S0005_A05	49097060	49098190
At_S0005_A05	49551345	49549999
At_S0005_A05	49571263	49569902
At_S0005_A05	50371491	50372819
At_S0005_A05	50868804	50867453
At_S0005_A05	50875957	50874605
At_S0005_A05	50927067	50925702
At_S0005_A05	50943477	50942113
At_S0005_A05	51904567	51905855
At_S0005_A05	54549734	54551087
At_S0005_A05	55064291	55063220
At_S0005_A05	55076020	55074663
At_S0005_A05	55096726	55098106
At_S0005_A05	55105533	55106628
At_S0005_A05	55370168	55371232
At_S0005_A05	55524150	55523070
At_S0005_A05	55586322	55587447
At_S0005_A05	55967695	55968757
At_S0005_A05	55986973	55985860
At_S0005_A05	56685708	56684345
At_S0005_A05	56934433	56933337
At_S0005_A05	57034151	57035508
At_S0005_A05	57043454	57044809
At_S0005_A05	58214738	58213562
At_S0005_A05	58346191	58344836
At_S0005_A05	58397606	58398729
At_S0005_A05	58652132	58653195
At_S0005_A05	58661400	58662480
At_S0005_A05	58798464	58799823
At_S0005_A05	58954687	58955752
At_S0005_A05	59069679	59068342
At_S0005_A05	59078258	59077023
At_S0005_A05	60506205	60507300
At_S0005_A05	61110083	61111447
At_S0005_A05	61724486	61725808
At_S0005_A05	61739362	61740728
At_S0005_A05	61781922	61783275
At_S0005_A05	61791095	61792443
At_S0005_A05	62368107	62369465
At_S0005_A05	62784028	62785387
At_S0005_A05	63389059	63390413
At_S0005_A05	63822886	63824244
At_S0005_A05	64134351	64133013
At_S0005_A05	64590852	64589485
At_S0005_A05	64599289	64597935
At_S0005_A05	64610084	64608721
At_S0005_A05	65858986	65857632
At_S0005_A05	66024056	66022682
At_S0005_A05	66505768	66507128
At_S0005_A05	66741177	66739994
At_S0005_A05	67190169	67191520
At_S0005_A05	67246329	67244990
At_S0005_A05	67261136	67259773
At_S0005_A05	67996811	67998132
At_S0005_A05	68005591	68006956
At_S0005_A05	68451037	68449698
At_S0005_A05	68459721	68458432
At_S0005_A05	68607059	68608419
At_S0005_A05	68616643	68618012
At_S0005_A05	68854726	68856082
At_S0005_A05	68864708	68866048
At_S0005_A05	68871261	68872602
At_S0005_A05	69254764	69255832
At_S0005_A05	69691806	69693178
At_S0005_A05	69979328	69977961
At_S0005_A05	69987748	69986380
At_S0005_A05	70048993	70047688
At_S0005_A05	70069067	70067694
At_S0005_A05	70110962	70109619
At_S0005_A05	70411810	70413163
At_S0005_A05	70566782	70565415
At_S0005_A05	70620615	70621970
At_S0005_A05	70657266	70658631
At_S0005_A05	70666698	70668050
At_S0005_A05	71330699	71331888
At_S0005_A05	71483324	71481955
At_S0005_A05	71560848	71559512
At_S0005_A05	71570870	71569523
At_S0005_A05	71614673	71615991
At_S0005_A05	72139845	72138475
At_S0005_A05	72187152	72185799
At_S0005_A05	72196093	72194726
At_S0005_A05	72257324	72255973
At_S0005_A05	72308858	72309923
At_S0005_A05	73256465	73255114
At_S0005_A05	73267741	73266413
At_S0005_A05	73269615	73268263
At_S0005_A05	73277460	73278827
At_S0005_A05	73287805	73289174
At_S0005_A05	73291709	73290358
At_S0005_A05	73793428	73794780
At_S0005_A05	73802768	73804130
At_S0005_A05	74147473	74146107
At_S0005_A05	75002637	75003994
At_S0005_A05	75512262	75513485
At_S0005_A05	75532343	75533711
At_S0005_A05	76081604	76082957
At_S0005_A05	76641226	76639846
At_S0005_A05	76648046	76646692
At_S0005_A05	76855298	76856643
At_S0005_A05	77135672	77136998
At_S0005_A05	77143921	77145276
At_S0005_A05	77167871	77169220
At_S0005_A05	77345468	77344100
At_S0005_A05	77354746	77353391
At_S0005_A05	77456016	77454655
At_S0005_A05	78059528	78060874
At_S0005_A05	78186277	78187605
At_S0005_A05	79167172	79165819
At_S0005_A05	79190651	79189288
At_S0005_A05	79224096	79225156
At_S0005_A05	79254487	79253139
At_S0005_A05	79265301	79263940
At_S0005_A05	79933577	79932218
At_S0005_A05	79937670	79936318
At_S0005_A05	79969194	79967834
At_S0005_A05	80196364	80195006
At_S0005_A05	81120503	81121893
At_S0005_A05	81127927	81129296
At_S0005_A05	81136116	81134762
At_S0005_A05	81761915	81760559
At_S0005_A05	81774173	81772819
At_S0005_A05	81994721	81996074
At_S0005_A05	82348000	82346630
At_S0005_A05	82693757	82692426
At_S0005_A05	83757601	83756251
At_S0005_A05	83920616	83919260
At_S0005_A05	84133825	84132457
At_S0005_A05	84142864	84141509
At_S0005_A05	85153132	85151796
At_S0005_A05	85159777	85158422
At_S0005_A05	85858144	85859371
At_S0005_A05	85859373	85860465
At_S0005_A05	86976840	86978193
At_S0005_A05	87182494	87181144
At_S0005_A05	87354877	87355964
At_S0005_A05	87614075	87615406
At_S0005_A05	87621043	87622394
At_S0005_A05	88638557	88639897
At_S0005_A05	88672692	88671626
At_S0005_A05	88932783	88934149
At_S0005_A05	89708825	89707742
At_S0005_A05	90328919	90330263
At_S0005_A05	90339205	90340542
At_S0005_A05	90340931	90342037
At_S0005_A05	91878061	91879463
At_S0005_A05	91889048	91887991
At_S0005_A05	91905522	91906615
At_S0005_A05	92254032	92255394
At_S0005_A05	94105101	94103767
At_S0005_A05	98351721	98350379
At_S0005_A05	98358659	98357344
At_S0005_A05	98647194	98648292
At_S0005_A05	99486937	99485581
At_S0006_A06	4869721	4868384
At_S0006_A06	4881860	4880535
At_S0006_A06	5060563	5059397
At_S0006_A06	5206347	5207698
At_S0006_A06	5214728	5216079
At_S0006_A06	5250606	5251869
At_S0006_A06	5258865	5260203
At_S0006_A06	5881609	5882777
At_S0006_A06	5899789	5898701
At_S0006_A06	6886358	6887552
At_S0006_A06	7045427	7044080
At_S0006_A06	7574183	7572830
At_S0006_A06	7574409	7575759
At_S0006_A06	9559169	9557821
At_S0006_A06	10135008	10133645
At_S0006_A06	11091577	11090207
At_S0006_A06	11120635	11119269
At_S0006_A06	11318057	11319112
At_S0006_A06	13322049	13320696
At_S0006_A06	13328716	13327381
At_S0006_A06	13647828	13649010
At_S0006_A06	13751245	13752598
At_S0006_A06	13809647	13808404
At_S0006_A06	13939833	13938771
At_S0006_A06	13969865	13971004
At_S0006_A06	13988593	13989763
At_S0006_A06	13989996	13991363
At_S0006_A06	13993607	13994964
At_S0006_A06	13996430	13997758
At_S0006_A06	14039116	14037773
At_S0006_A06	14090427	14091778
At_S0006_A06	14096972	14098324
At_S0006_A06	14459212	14457858
At_S0006_A06	14655858	14657032
At_S0006_A06	14739351	14740669
At_S0006_A06	14747726	14749094
At_S0006_A06	14749925	14751275
At_S0006_A06	14818429	14817072
At_S0006_A06	14832707	14831353
At_S0006_A06	14865991	14867338
At_S0006_A06	14875010	14876377
At_S0006_A06	14889520	14888150
At_S0006_A06	14904871	14906217
At_S0006_A06	14911081	14912437
At_S0006_A06	14922783	14924121
At_S0006_A06	14934445	14935797
At_S0006_A06	14942935	14944301
At_S0006_A06	14949608	14948252
At_S0006_A06	14961835	14960779
At_S0006_A06	14984311	14985652
At_S0006_A06	14986833	14988180
At_S0006_A06	16005534	16006898
At_S0006_A06	16043296	16044656
At_S0006_A06	16612301	16610945
At_S0006_A06	17663304	17664641
At_S0006_A06	17752845	17751469
At_S0006_A06	17917439	17918798
At_S0006_A06	17939289	17940646
At_S0006_A06	18014262	18015625
At_S0006_A06	18025478	18026833
At_S0006_A06	18133707	18132372
At_S0006_A06	18143315	18141956
At_S0006_A06	18156150	18154800
At_S0006_A06	18165418	18164051
At_S0006_A06	18187134	18188470
At_S0006_A06	18224985	18226342
At_S0006_A06	18687652	18686287
At_S0006_A06	18752773	18753930
At_S0006_A06	18939128	18940501
At_S0006_A06	18945895	18947265
At_S0006_A06	19152502	19153865
At_S0006_A06	19304403	19305767
At_S0006_A06	19317850	19319214
At_S0006_A06	19544486	19543141
At_S0006_A06	19554760	19553406
At_S0006_A06	19718217	19717136
At_S0006_A06	19774091	19772735
At_S0006_A06	19878587	19877250
At_S0006_A06	19886991	19885812
At_S0006_A06	20084876	20083519
At_S0006_A06	20091652	20090284
At_S0006_A06	20321778	20320427
At_S0006_A06	20769316	20767966
At_S0006_A06	20776657	20775302
At_S0006_A06	20849466	20850825
At_S0006_A06	20872676	20874030
At_S0006_A06	21228245	21227087
At_S0006_A06	21747263	21745897
At_S0006_A06	21894655	21893292
At_S0006_A06	21901609	21900242
At_S0006_A06	21911036	21912403
At_S0006_A06	22085353	22084035
At_S0006_A06	22102448	22103769
At_S0006_A06	22407801	22406748
At_S0006_A06	22551578	22552931
At_S0006_A06	22992213	22993293
At_S0006_A06	23010588	23011684
At_S0006_A06	23024113	23025460
At_S0006_A06	23081064	23082415
At_S0006_A06	23219997	23218930
At_S0006_A06	23375612	23374551
At_S0006_A06	23403878	23405183
At_S0006_A06	23445252	23443889
At_S0006_A06	23584113	23585165
At_S0006_A06	23595536	23596609
At_S0006_A06	23630516	23631883
At_S0006_A06	23634476	23635833
At_S0006_A06	23643595	23644969
At_S0006_A06	23738730	23740087
At_S0006_A06	23869738	23868389
At_S0006_A06	24079546	24080822
At_S0006_A06	24093389	24094755
At_S0006_A06	24239416	24240773
At_S0006_A06	24303305	24301950
At_S0006_A06	24311896	24310533
At_S0006_A06	24322142	24320801
At_S0006_A06	24397576	24396501
At_S0006_A06	24520850	24522219
At_S0006_A06	24609193	24607835
At_S0006_A06	24660984	24659888
At_S0006_A06	24818200	24819303
At_S0006_A06	24829201	24830472
At_S0006_A06	24830476	24831701
At_S0006_A06	25225777	25224434
At_S0006_A06	25337766	25336394
At_S0006_A06	25373722	25374859
At_S0006_A06	25386449	25387815
At_S0006_A06	25503687	25504844
At_S0006_A06	25512746	25514089
At_S0006_A06	25520809	25519461
At_S0006_A06	26945863	26944506
At_S0006_A06	27430690	27432045
At_S0006_A06	27606322	27605161
At_S0006_A06	27738526	27737170
At_S0006_A06	28665073	28666441
At_S0006_A06	29022631	29021544
At_S0006_A06	29039520	29038193
At_S0006_A06	30333122	30334496
At_S0006_A06	30684197	30685570
At_S0006_A06	30693740	30695116
At_S0006_A06	31129980	31128795
At_S0006_A06	31473764	31472415
At_S0006_A06	31480278	31479008
At_S0006_A06	32134144	32135501
At_S0006_A06	32143859	32145218
At_S0006_A06	32424711	32423366
At_S0006_A06	32468747	32467397
At_S0006_A06	32654756	32653491
At_S0006_A06	32762081	32763436
At_S0006_A06	32855612	32854541
At_S0006_A06	33039794	33041133
At_S0006_A06	33052301	33050967
At_S0006_A06	33363819	33362579
At_S0006_A06	33373298	33371952
At_S0006_A06	33566023	33567377
At_S0006_A06	33629456	33628119
At_S0006_A06	34085888	34084589
At_S0006_A06	34087830	34089181
At_S0006_A06	34401760	34400393
At_S0006_A06	34412792	34411436
At_S0006_A06	34424155	34425485
At_S0006_A06	34457088	34458442
At_S0006_A06	34470233	34471616
At_S0006_A06	35158785	35157529
At_S0006_A06	35381151	35379851
At_S0006_A06	35391982	35390648
At_S0006_A06	35508021	35509152
At_S0006_A06	36291887	36292950
At_S0006_A06	36368826	36367484
At_S0006_A06	36375385	36374044
At_S0006_A06	36433781	36435139
At_S0006_A06	36443026	36444384
At_S0006_A06	36874676	36873613
At_S0006_A06	37849519	37848169
At_S0006_A06	37910763	37912112
At_S0006_A06	37920408	37921506
At_S0006_A06	38372083	38370732
At_S0006_A06	38381664	38380290
At_S0006_A06	38645768	38644418
At_S0006_A06	38738136	38739463
At_S0006_A06	38802844	38804115
At_S0006_A06	39086447	39085077
At_S0006_A06	39202062	39203407
At_S0006_A06	39219313	39217962
At_S0006_A06	39227522	39226171
At_S0006_A06	39870878	39869526
At_S0006_A06	39879637	39878288
At_S0006_A06	40700049	40698700
At_S0006_A06	40708333	40706968
At_S0006_A06	41388505	41387368
At_S0006_A06	41398214	41396859
At_S0006_A06	41882042	41883413
At_S0006_A06	42018710	42020060
At_S0006_A06	42882240	42880887
At_S0006_A06	43660640	43662006
At_S0006_A06	43667020	43668216
At_S0006_A06	44578324	44577263
At_S0006_A06	44769996	44768651
At_S0006_A06	44778500	44777148
At_S0006_A06	44871877	44873247
At_S0006_A06	46824253	46822896
At_S0006_A06	46834593	46833226
At_S0006_A06	48247486	48246121
At_S0006_A06	48313791	48312440
At_S0006_A06	48754238	48755604
At_S0006_A06	48762530	48763880
At_S0006_A06	48986623	48985516
At_S0006_A06	48995168	48993829
At_S0006_A06	49080608	49079538
At_S0006_A06	49556156	49555078
At_S0006_A06	49630991	49632334
At_S0006_A06	49639156	49640473
At_S0006_A06	49750481	49749129
At_S0006_A06	49758997	49757644
At_S0006_A06	49929632	49930905
At_S0006_A06	50653933	50652578
At_S0006_A06	50670572	50669207
At_S0006_A06	50677445	50676098
At_S0006_A06	50920767	50919561
At_S0006_A06	50927175	50925901
At_S0006_A06	51082811	51084180
At_S0006_A06	51091375	51092633
At_S0006_A06	51736177	51737532
At_S0006_A06	51745166	51743815
At_S0006_A06	51753952	51752758
At_S0006_A06	52203002	52204077
At_S0006_A06	53254682	53255766
At_S0006_A06	53264613	53265964
At_S0006_A06	53316472	53317825
At_S0006_A06	53660588	53659238
At_S0006_A06	53752985	53751628
At_S0006_A06	54233952	54235299
At_S0006_A06	54718154	54717018
At_S0006_A06	55175392	55176735
At_S0006_A06	55184531	55185882
At_S0006_A06	55795450	55794378
At_S0006_A06	56131211	56132577
At_S0006_A06	56152260	56150987
At_S0006_A06	56160497	56159157
At_S0006_A06	56255226	56253871
At_S0006_A06	56970005	56971345
At_S0006_A06	56978492	56979811
At_S0006_A06	57012874	57011533
At_S0006_A06	59003745	59005118
At_S0006_A06	59009529	59008169
At_S0006_A06	59566830	59567946
At_S0006_A06	59950341	59951711
At_S0006_A06	60182905	60184281
At_S0006_A06	60191074	60192441
At_S0006_A06	60252851	60254204
At_S0006_A06	60590633	60589275
At_S0006_A06	60599705	60598348
At_S0006_A06	61778196	61776853
At_S0006_A06	61797189	61795995
At_S0006_A06	62460213	62459150
At_S0006_A06	62482359	62480997
At_S0006_A06	62521657	62522988
At_S0006_A06	65201716	65200363
At_S0006_A06	65230820	65229459
At_S0006_A06	65393376	65392086
At_S0006_A06	65476370	65475002
At_S0006_A06	65485013	65483659
At_S0006_A06	66759742	66761095
At_S0006_A06	67393237	67391912
At_S0006_A06	67456262	67457612
At_S0006_A06	67781861	67783100
At_S0006_A06	68238456	68239742
At_S0006_A06	68246237	68247602
At_S0006_A06	68532687	68534040
At_S0006_A06	69541875	69540520
At_S0006_A06	70213211	70211848
At_S0006_A06	71928778	71930080
At_S0006_A06	72724642	72725729
At_S0006_A06	72736299	72734952
At_S0006_A06	73190091	73188864
At_S0006_A06	73199085	73197725
At_S0006_A06	73370870	73369500
At_S0006_A06	73637040	73635687
At_S0006_A06	73981649	73980302
At_S0006_A06	74553751	74552686
At_S0006_A06	75226329	75227386
At_S0006_A06	75611285	75612624
At_S0006_A06	75639742	75641102
At_S0006_A06	76010927	76012296
At_S0006_A06	76058814	76057749
At_S0006_A06	76081948	76080594
At_S0006_A06	76088341	76086975
At_S0006_A06	76150066	76151132
At_S0006_A06	76361943	76360588
At_S0006_A06	76482680	76481344
At_S0006_A06	76496424	76495085
At_S0006_A06	77083398	77084695
At_S0006_A06	77091584	77092940
At_S0006_A06	77129473	77128124
At_S0006_A06	77403966	77402615
At_S0006_A06	77411737	77410371
At_S0006_A06	77443022	77441681
At_S0006_A06	77792047	77793401
At_S0006_A06	78117960	78119188
At_S0006_A06	78195384	78196715
At_S0006_A06	78216500	78217859
At_S0006_A06	78227167	78228362
At_S0006_A06	78364785	78366123
At_S0006_A06	78421117	78419749
At_S0006_A06	78609894	78608538
At_S0006_A06	78706733	78705422
At_S0006_A06	78721781	78720405
At_S0006_A06	79229053	79230399
At_S0006_A06	79402551	79403904
At_S0006_A06	79542145	79543500
At_S0006_A06	79551652	79552991
At_S0006_A06	79559192	79557824
At_S0006_A06	79580141	79578789
At_S0006_A06	80042583	80043650
At_S0006_A06	80418840	80417748
At_S0006_A06	80849084	80850446
At_S0006_A06	80988797	80990163
At_S0006_A06	81296526	81297869
At_S0006_A06	81516240	81517579
At_S0006_A06	81823005	81824231
At_S0006_A06	81913132	81911788
At_S0006_A06	81918106	81917008
At_S0006_A06	82861563	82860207
At_S0006_A06	83710403	83711747
At_S0006_A06	83712665	83714010
At_S0006_A06	84014471	84015753
At_S0006_A06	84479943	84478879
At_S0006_A06	85148213	85149564
At_S0006_A06	85157635	85158986
At_S0006_A06	85163569	85164917
At_S0006_A06	85172014	85173147
At_S0006_A06	85326048	85327406
At_S0006_A06	85575459	85574137
At_S0006_A06	86398740	86400009
At_S0006_A06	86718098	86716728
At_S0006_A06	86742423	86743775
At_S0006_A06	86910966	86909611
At_S0006_A06	86915893	86917232
At_S0006_A06	86928312	86929666
At_S0006_A06	87290650	87291698
At_S0006_A06	87296127	87294771
At_S0006_A06	87301015	87299892
At_S0006_A06	87330754	87329392
At_S0006_A06	87824242	87825464
At_S0006_A06	87919086	87920152
At_S0006_A06	88038627	88039977
At_S0006_A06	88047106	88048469
At_S0006_A06	88356152	88355078
At_S0006_A06	88373343	88374435
At_S0006_A06	88691450	88690371
At_S0006_A06	88706541	88705211
At_S0006_A06	88982181	88980811
At_S0006_A06	89213598	89212241
At_S0006_A06	89222461	89221124
At_S0006_A06	89359045	89357691
At_S0006_A06	89608158	89606781
At_S0006_A06	89639832	89638476
At_S0006_A06	90103754	90102390
At_S0006_A06	90221405	90220039
At_S0006_A06	90543992	90545318
At_S0006_A06	90960533	90961871
At_S0006_A06	90969405	90970754
At_S0006_A06	91058641	91059732
At_S0006_A06	91268483	91269839
At_S0006_A06	92196922	92195569
At_S0006_A06	92205438	92204088
At_S0006_A06	92271013	92272369
At_S0006_A06	93409752	93408399
At_S0006_A06	93430820	93429457
At_S0006_A06	93436941	93438263
At_S0006_A06	95085581	95084232
At_S0006_A06	95128131	95129486
At_S0006_A06	95409177	95410222
At_S0006_A06	95420421	95419062
At_S0006_A06	95428802	95427443
At_S0006_A06	95450587	95449520
At_S0006_A06	95457577	95456512
At_S0006_A06	95566755	95567883
At_S0006_A06	95584250	95583170
At_S0006_A06	95593255	95591896
At_S0006_A06	95596612	95595548
At_S0006_A06	95717482	95718820
At_S0006_A06	96714664	96716004
At_S0006_A06	96800843	96799488
At_S0006_A06	96860363	96859016
At_S0006_A06	97818815	97817465
At_S0006_A06	97943422	97944789
At_S0006_A06	97989040	97987826
At_S0006_A06	98076809	98078176
At_S0006_A06	98398257	98396901
At_S0006_A06	98407425	98406077
At_S0006_A06	99428797	99427447
At_S0006_A06	100244142	100245493
At_S0006_A06	100250632	100251999
At_S0006_A06	100510082	100508730
At_S0006_A06	100546920	100548273
At_S0006_A06	100555831	100557184
At_S0006_A06	101015515	101014165
At_S0006_A06	101028956	101027604
At_S0006_A06	101622987	101621641
At_S0006_A06	101631616	101630249
At_S0006_A06	101792670	101794035
At_S0006_A06	101801597	101802946
At_S0006_A06	101850124	101848765
At_S0006_A06	101859406	101858047
At_S0006_A06	101870483	101871652
At_S0006_A06	102819332	102817941
At_S0006_A06	102892147	102893503
At_S0006_A06	102909024	102910405
At_S0006_A06	103435578	103436766
At_S0006_A06	103438572	103437194
At_S0006_A06	103448240	103449608
At_S0006_A06	103586681	103585460
At_S0006_A06	103911512	103910371
At_S0006_A06	104225049	104223681
At_S0006_A06	104226464	104227817
At_S0006_A06	104267112	104265875
At_S0006_A06	104279408	104278072
At_S0006_A06	105023180	105022137
At_S0006_A06	105232761	105233857
At_S0006_A06	105245542	105246742
At_S0006_A06	105269670	105268373
At_S0006_A06	105553603	105552529
At_S0006_A06	105633250	105631887
At_S0006_A06	106088654	106090006
At_S0006_A06	106096788	106098111
At_S0006_A06	106618293	106619678
At_S0006_A06	107212965	107214339
At_S0006_A06	107347320	107348662
At_S0006_A06	107357701	107359036
At_S0006_A06	107653490	107654584
At_S0006_A06	107692171	107693509
At_S0006_A06	107835712	107834654
At_S0006_A06	108039479	108040863
At_S0006_A06	108090766	108092110
At_S0006_A06	108097716	108099076
At_S0006_A06	108194063	108192702
At_S0006_A06	108717332	108718685
At_S0006_A06	109020119	109018767
At_S0006_A06	110412744	110413810
At_S0006_A06	110433679	110435030
At_S0006_A06	110465510	110466861
At_S0006_A06	110834024	110835150
At_S0006_A06	113397036	113398401
At_S0007_A07	7308904	7310136
At_S0007_A07	7674014	7675356
At_S0007_A07	7680591	7681955
At_S0007_A07	7757873	7756518
At_S0007_A07	7792670	7794027
At_S0007_A07	7801187	7802547
At_S0007_A07	9426872	9425521
At_S0007_A07	9893118	9891751
At_S0007_A07	9896686	9895624
At_S0007_A07	9905356	9904294
At_S0007_A07	9907965	9906631
At_S0007_A07	10030497	10029424
At_S0007_A07	10111650	10110296
At_S0007_A07	10120064	10118708
At_S0007_A07	10317283	10315926
At_S0007_A07	10481977	10483062
At_S0007_A07	10716547	10715186
At_S0007_A07	11115591	11114233
At_S0007_A07	11797268	11795914
At_S0007_A07	11805046	11803664
At_S0007_A07	11969782	11971137
At_S0007_A07	11982929	11984264
At_S0007_A07	11986120	11987426
At_S0007_A07	11994241	11995600
At_S0007_A07	12000574	12001933
At_S0007_A07	12050534	12051904
At_S0007_A07	12679811	12678459
At_S0007_A07	12904284	12905362
At_S0007_A07	12924167	12922826
At_S0007_A07	12955048	12956368
At_S0007_A07	12962114	12963472
At_S0007_A07	12963869	12965217
At_S0007_A07	12981788	12980669
At_S0007_A07	12983603	12982246
At_S0007_A07	13100755	13102108
At_S0007_A07	13344599	13343470
At_S0007_A07	13806215	13807570
At_S0007_A07	13840961	13839606
At_S0007_A07	13851715	13850364
At_S0007_A07	13864416	13865614
At_S0007_A07	14439822	14440955
At_S0007_A07	15024695	15023339
At_S0007_A07	15206787	15208156
At_S0007_A07	15232487	15231116
At_S0007_A07	15244829	15243466
At_S0007_A07	15296643	15298010
At_S0007_A07	15590466	15589109
At_S0007_A07	15612931	15611781
At_S0007_A07	15630603	15629354
At_S0007_A07	15635135	15633785
At_S0007_A07	15641521	15640176
At_S0007_A07	15647493	15646127
At_S0007_A07	16013184	16014519
At_S0007_A07	16174692	16176055
At_S0007_A07	16196510	16195444
At_S0007_A07	17357599	17358933
At_S0007_A07	17579891	17578623
At_S0007_A07	17610813	17609466
At_S0007_A07	17611918	17610814
At_S0007_A07	17613011	17611919
At_S0007_A07	17613484	17614730
At_S0007_A07	17644247	17645601
At_S0007_A07	17997456	17998826
At_S0007_A07	18080421	18079228
At_S0007_A07	18439349	18440540
At_S0007_A07	19664014	19662669
At_S0007_A07	19692199	19691118
At_S0007_A07	20831114	20829751
At_S0007_A07	20837522	20836159
At_S0007_A07	20934250	20933163
At_S0007_A07	20959513	20958209
At_S0007_A07	20994098	20995446
At_S0007_A07	21000357	21001474
At_S0007_A07	21395790	21397148
At_S0007_A07	21406772	21408139
At_S0007_A07	21451353	21452453
At_S0007_A07	21746165	21747488
At_S0007_A07	22185964	22184900
At_S0007_A07	22202210	22203566
At_S0007_A07	22220075	22221434
At_S0007_A07	22257351	22256012
At_S0007_A07	22830373	22831730
At_S0007_A07	22864094	22863029
At_S0007_A07	22995496	22996589
At_S0007_A07	23293244	23291891
At_S0007_A07	23302713	23301348
At_S0007_A07	23316651	23315515
At_S0007_A07	23325567	23324204
At_S0007_A07	23515770	23517004
At_S0007_A07	23566301	23564949
At_S0007_A07	23589425	23590777
At_S0007_A07	23983862	23982523
At_S0007_A07	24060373	24061719
At_S0007_A07	24293630	24292275
At_S0007_A07	24300146	24298790
At_S0007_A07	24778095	24779438
At_S0007_A07	24793378	24794720
At_S0007_A07	25134241	25135593
At_S0007_A07	25143349	25144716
At_S0007_A07	25426344	25424990
At_S0007_A07	25594523	25593162
At_S0007_A07	25597030	25595689
At_S0007_A07	25635047	25636399
At_S0007_A07	25645561	25646917
At_S0007_A07	25658698	25660074
At_S0007_A07	25668198	25669548
At_S0007_A07	25898760	25900111
At_S0007_A07	26236290	26237662
At_S0007_A07	26247284	26248647
At_S0007_A07	26391235	26392346
At_S0007_A07	26400553	26401917
At_S0007_A07	26960461	26959105
At_S0007_A07	26969425	26968070
At_S0007_A07	27060766	27059675
[truncated: 2,926 more rows]

## Sheet: S4-4
Table S4-4 Distribution of CICR-LTR in (AD)2-HAU.
Chr.	Start	End
GbA01	8553971	8555337
GbA01	8824002	8822636
GbA01	10241559	10242862
GbA01	10275717	10274362
GbA01	10604833	10603477
GbA01	10605302	10606626
GbA01	10719398	10720729
GbA01	15232637	15234004
GbA01	15245588	15246932
GbA01	15654229	15655578
GbA01	15657579	15658928
GbA01	15659627	15660951
GbA01	16175810	16177189
GbA01	16579898	16578524
GbA01	16754604	16753239
GbA01	17158720	17160067
GbA01	18431567	18430336
GbA01	19619484	19620839
GbA01	23798885	23797537
GbA01	26610801	26609503
GbA01	26839018	26840374
GbA01	26864745	26866084
GbA01	27651793	27653136
GbA01	30677769	30679112
GbA01	30696237	30697570
GbA01	30733643	30732274
GbA01	30737858	30736489
GbA01	30747897	30746530
GbA01	30930124	30928764
GbA01	31027744	31026404
GbA01	32129524	32128207
GbA01	33173088	33174467
GbA01	35292555	35293908
GbA01	37015469	37016837
GbA01	37026619	37027988
GbA01	38609928	38608716
GbA01	38789951	38791305
GbA01	39388603	39389861
GbA01	39397655	39398959
GbA01	44277687	44279046
GbA01	48855227	48853921
GbA01	52199332	52200674
GbA01	52223603	52224947
GbA01	53057914	53059286
GbA01	53498729	53500079
GbA01	54805917	54804553
GbA01	57144656	57143288
GbA01	59608631	59609987
GbA01	59617413	59618769
GbA01	59619710	59620961
GbA01	61038411	61037064
GbA01	62321832	62320454
GbA01	62332263	62331033
GbA01	63704036	63702680
GbA01	65032496	65033853
GbA01	67409680	67408329
GbA01	67414835	67413495
GbA01	68432375	68431061
GbA01	68443674	68442350
GbA01	69442536	69443785
GbA01	71806492	71807860
GbA01	72386760	72385421
GbA01	72398093	72396757
GbA01	72449361	72447996
GbA01	75671213	75672572
GbA01	76845420	76846755
GbA01	80009792	80008545
GbA01	80064031	80062851
GbA02	4516741	4515504
GbA02	9842016	9840660
GbA02	9974900	9973567
GbA02	9980491	9981717
GbA02	14602651	14603861
GbA02	14619098	14620290
GbA02	14657776	14656426
GbA02	16121856	16123218
GbA02	16123231	16124518
GbA02	17761407	17760050
GbA02	17766525	17765168
GbA02	19424542	19423200
GbA02	20786886	20788241
GbA02	26990466	26989222
GbA02	26997130	26995852
GbA02	27001907	27000557
GbA02	28898118	28899432
GbA02	38924120	38922785
GbA02	40643678	40645022
GbA02	40653615	40654985
GbA02	43533779	43532440
GbA02	43543609	43542270
GbA02	44138338	44139703
GbA02	44373396	44374707
GbA02	45708122	45709377
GbA02	48340121	48341459
GbA02	48348308	48349592
GbA02	50114421	50113081
GbA02	50238186	50236822
GbA02	50255948	50254599
GbA02	51191786	51190525
GbA02	53497466	53498783
GbA02	53517624	53518994
GbA02	55184562	55183224
GbA02	56370100	56368771
GbA02	58379402	58378094
GbA02	63462921	63461683
GbA02	63470985	63469647
GbA02	67932300	67930972
GbA02	68293904	68292663
GbA02	70075865	70074499
GbA02	70144506	70145816
GbA02	71463986	71465352
GbA02	71706166	71704810
GbA02	73989071	73990422
GbA02	75674466	75675833
GbA02	77006639	77007971
GbA02	77593944	77592592
GbA02	77630612	77629441
GbA02	78570884	78572158
GbA02	80684580	80685929
GbA02	80688263	80689631
GbA02	80694698	80695995
GbA02	81426099	81424740
GbA02	81434043	81432682
GbA02	82257113	82255780
GbA02	84902951	84904301
GbA03	8459857	8458632
GbA03	8509946	8508609
GbA03	8537060	8535706
GbA03	9456279	9457643
GbA03	9514638	9513333
GbA03	9537922	9536556
GbA03	9578917	9577596
GbA03	11313531	11312179
GbA03	15392491	15391131
GbA03	16222588	16223952
GbA03	18982049	18980695
GbA03	18996908	18998267
GbA03	19547681	19546329
GbA03	19664191	19665546
GbA03	20286149	20284797
GbA03	21758888	21760227
GbA03	23418058	23419406
GbA03	26795766	26794397
GbA03	33262239	33263614
GbA03	44456989	44458332
GbA03	45712804	45711473
GbA03	48081052	48082270
GbA03	50094316	50092964
GbA03	50104196	50102851
GbA03	51725079	51723730
GbA03	51758110	51756760
GbA03	57124405	57125741
GbA03	61749390	61748039
GbA03	62143293	62141925
GbA03	66908268	66906931
GbA03	67478823	67477575
GbA03	67529174	67528001
GbA03	67572325	67570975
GbA03	70241474	70242840
GbA03	70243077	70244281
GbA03	70564489	70565855
GbA03	75950674	75952014
GbA03	79162470	79163827
GbA03	80774513	80773247
GbA03	85515663	85514324
GbA03	85570346	85571697
GbA03	87462694	87461363
GbA03	87996829	87995530
GbA03	88003711	88005016
GbA03	91096480	91095125
GbA03	91841114	91842316
GbA03	91948898	91950246
GbA03	93036947	93038300
GbA03	93749830	93748659
GbA03	94849875	94848511
GbA03	97421468	97422825
GbA04	7227782	7226520
GbA04	9433952	9432756
GbA04	9575957	9577305
GbA04	9711426	9712781
GbA04	14670680	14669335
GbA04	14698162	14696796
GbA04	17175279	17173953
GbA04	25534524	25535868
GbA04	27783031	27784375
GbA04	32259252	32258024
GbA04	32321368	32322720
GbA04	32852123	32853475
GbA04	35522813	35524185
GbA04	37192599	37191260
GbA04	38179809	38178442
GbA04	39721991	39720639
GbA04	42146558	42147895
GbA04	42195094	42196339
GbA04	42517345	42518714
GbA04	43083104	43084451
GbA04	43447180	43448484
GbA04	46296297	46297635
GbA04	46450616	46449262
GbA04	47999265	48000538
GbA04	48074406	48075733
GbA04	48113598	48114753
GbA04	48296965	48295613
GbA04	48427632	48426278
GbA04	48453144	48451808
GbA04	51458155	51456830
GbA04	54193254	54194592
GbA04	56601145	56599859
GbA04	57771874	57770501
GbA04	57791309	57792608
GbA05	17030875	17029538
GbA05	20510413	20511760
GbA05	28393294	28391939
GbA05	34586657	34585399
GbA05	40304241	40305592
GbA05	41474143	41472796
GbA05	41543065	41541796
GbA05	43762075	43760720
GbA05	43806049	43807361
GbA05	43882169	43880865
GbA05	43930708	43931987
GbA05	44906414	44905068
GbA05	44941688	44940346
GbA05	45312872	45311487
GbA05	45315837	45314562
GbA05	45943594	45942238
GbA05	46015302	46016482
GbA05	46382271	46383636
GbA05	46705995	46704638
GbA05	50884185	50885520
GbA05	50906634	50907977
GbA05	53263642	53262270
GbA05	53411265	53412633
GbA05	53419684	53421051
GbA05	57680772	57679424
GbA05	59220181	59218822
GbA05	59240213	59238853
GbA05	59245066	59243708
GbA05	60903745	60902391
GbA05	62300230	62301555
GbA05	63783159	63784443
GbA05	66139381	66138014
GbA05	66340405	66339031
GbA05	66703708	66705077
GbA05	67350518	67351799
GbA05	68378024	68376853
GbA05	69250069	69248900
GbA05	70693456	70692239
GbA05	70695411	70694060
GbA05	71842359	71843719
GbA05	73970072	73968736
GbA05	77395064	77396284
GbA05	82421533	82420139
GbA05	90925369	90926690
GbA06	4950944	4949607
GbA06	4971864	4970540
GbA06	6703619	6702269
GbA06	12200839	12202197
GbA06	16565201	16563870
GbA06	16666924	16665637
GbA06	19103412	19102050
GbA06	19115337	19114010
GbA06	19448206	19446892
GbA06	19455874	19454695
GbA06	20039294	20040645
GbA06	20046380	20047569
GbA06	20089637	20090981
GbA06	20317809	20316510
GbA06	21539644	21540998
GbA06	21543796	21545150
GbA06	22909477	22910828
GbA06	29746935	29745589
GbA06	31629144	31630484
GbA06	32375750	32374399
GbA06	32378084	32379383
GbA06	32737406	32738677
GbA06	35211977	35213326
GbA06	36831978	36830781
GbA06	38242744	38244089
GbA06	38691011	38692380
GbA06	40509315	40507964
GbA06	41265303	41266660
GbA06	41365166	41366516
GbA06	43585846	43584499
GbA06	50849021	50847657
GbA06	52073518	52074880
GbA06	55969915	55968709
GbA06	56454230	56452877
GbA06	56711808	56713158
GbA06	58118595	58117252
GbA06	62454208	62455547
GbA06	62485526	62486886
GbA06	62782444	62783813
GbA06	62787335	62788704
GbA06	62807643	62808913
GbA06	65196648	65198014
GbA06	68275527	68274180
GbA06	71417867	71416681
GbA06	72899475	72898107
GbA06	75043835	75045184
GbA06	75842047	75840686
GbA06	78392351	78393705
GbA06	79437580	79436235
GbA06	83197515	83198819
GbA06	85534560	85533180
GbA06	86040008	86038819
GbA06	86595929	86597269
GbA06	90485404	90484106
GbA06	90824778	90823406
GbA06	90845184	90843826
GbA06	90887421	90886124
GbA06	93266161	93267355
GbA06	94935668	94936960
GbA07	10824026	10825387
GbA07	12336025	12337377
GbA07	12348777	12350125
GbA07	12646712	12645332
GbA07	12826154	12827513
GbA07	12829374	12830605
GbA07	12846229	12847469
GbA07	14399925	14401277
GbA07	14650102	14651472
GbA07	14782693	14781342
GbA07	14789277	14790450
GbA07	15611839	15610472
GbA07	15826069	15827410
GbA07	15861888	15860517
GbA07	15877120	15875757
GbA07	15939908	15941154
GbA07	22068858	22067501
GbA07	22110658	22111962
GbA07	22116222	22117526
GbA07	24662207	24663565
GbA07	26161343	26160010
GbA07	26652112	26650770
GbA07	26984851	26986205
GbA07	26993232	26994426
GbA07	28379487	28380823
GbA07	28384195	28385562
GbA07	28696756	28698128
GbA07	30581512	30582886
GbA07	30591661	30592934
GbA07	34011373	34012739
GbA07	34019845	34021109
GbA07	34146265	34147483
GbA07	34161218	34159889
GbA07	36332463	36331093
GbA07	36728219	36729582
GbA07	36736248	36737601
GbA07	37016423	37017768
GbA07	37528590	37529955
GbA07	41493105	41491803
GbA07	43871615	43872974
GbA07	43879906	43881244
GbA07	45406794	45408160
GbA07	47909320	47910684
GbA07	51226403	51225045
GbA07	52221380	52222578
GbA07	52224960	52226342
GbA07	52732255	52730920
GbA07	53128344	53129533
GbA07	53449095	53450431
GbA07	54004480	54003141
GbA07	54173844	54172489
GbA07	58588672	58590020
GbA07	59825787	59824420
GbA07	62606080	62607381
GbA07	63114188	63112807
GbA07	67134524	67135873
GbA07	68831235	68832576
GbA07	68835241	68836582
GbA07	70592110	70590770
GbA07	71185645	71186976
GbA07	73945982	73947335
GbA07	73958032	73959255
GbA07	74557391	74558746
GbA07	74694540	74695845
GbA07	77385679	77384364
GbA07	78689844	78691184
GbA07	80451075	80452370
GbA07	83157125	83158456
GbA08	3017943	3016691
GbA08	7653454	7652097
GbA08	9969602	9970964
GbA08	13398791	13397442
GbA08	14448704	14447360
GbA08	14736491	14735125
GbA08	16204760	16206127
GbA08	17485154	17486519
GbA08	18790017	18791308
GbA08	22141779	22140450
GbA08	22155666	22154308
GbA08	25051994	25053351
GbA08	25426249	25427602
GbA08	25438392	25439745
GbA08	27295760	27296979
GbA08	31632157	31633512
GbA08	33432338	33430976
GbA08	39381654	39380301
GbA08	41714898	41716268
GbA08	41739004	41740239
GbA08	43189349	43188035
GbA08	51628470	51627130
GbA08	52707586	52708764
GbA08	52720418	52721783
GbA08	52978973	52977618
GbA08	54967463	54966203
GbA08	55049765	55051048
GbA08	56283467	56284815
GbA08	56519431	56520666
GbA08	56528166	56529513
GbA08	62020584	62021920
GbA08	62029357	62030706
GbA08	62664090	62662738
GbA08	65715661	65714325
GbA08	66282261	66283543
GbA08	66290703	66292067
GbA08	66552366	66551091
GbA08	66563323	66562112
GbA08	66588503	66589866
GbA08	73227697	73226350
GbA08	74618453	74619809
GbA08	74621205	74622490
GbA08	77418678	77417336
GbA08	77446112	77444760
GbA08	77705010	77706371
GbA08	79143722	79145054
GbA08	80497176	80498400
GbA08	80578252	80579606
GbA08	83826499	83827789
GbA08	84579993	84578628
GbA08	84596684	84595318
GbA08	85583661	85582317
GbA08	86552015	86550657
GbA08	86560874	86559536
GbA08	86593091	86594439
GbA08	86605067	86606415
GbA08	87027418	87028772
GbA08	91288767	91290115
GbA08	93201428	93200087
GbA08	96554197	96552836
GbA08	97304978	97306268
GbA08	97760815	97759464
GbA09	6933829	6932548
GbA09	9802841	9804210
GbA09	9951834	9950509
GbA09	12778993	12780360
GbA09	17007921	17006594
GbA09	19361178	19359812
GbA09	19858524	19857169
GbA09	19864908	19863541
GbA09	20976000	20974632
GbA09	21087481	21086148
GbA09	21090906	21089573
GbA09	21501666	21503019
GbA09	21794398	21793026
GbA09	22430886	22432235
GbA09	22469039	22470388
GbA09	22476518	22477867
GbA09	22534026	22535381
GbA09	22581662	22582864
GbA09	22605251	22603934
GbA09	26997390	26998725
GbA09	27329399	27330718
GbA09	29853493	29854848
GbA09	31251168	31249816
GbA09	33637983	33639333
GbA09	33654360	33655704
GbA09	33824957	33826224
GbA09	35562702	35564048
GbA09	36490411	36489055
GbA09	39480914	39479560
GbA09	40881194	40882560
GbA09	42804993	42803633
GbA09	43944308	43942964
GbA09	50678674	50680008
GbA09	51529506	51530859
GbA09	51541872	51543225
GbA09	51820419	51821773
GbA09	51885838	51884505
GbA09	52367389	52368735
GbA09	55418832	55420164
GbA09	55427829	55429180
GbA09	55456922	55458243
GbA09	55760896	55759527
GbA09	58611383	58612713
GbA10	8756125	8757357
GbA10	8873924	8875278
GbA10	8891755	8890519
GbA10	11494952	11493649
GbA10	14450748	14449394
GbA10	15044134	15045361
GbA10	15168156	15169487
GbA10	17327317	17325978
GbA10	20718978	20720347
GbA10	28856436	28857656
GbA10	29761864	29763206
GbA10	29796063	29797411
GbA10	31496245	31497482
GbA10	33984791	33983614
GbA10	37588906	37587539
GbA10	44353189	44351838
GbA10	45440716	45442048
GbA10	46215901	46217221
GbA10	50788953	50787572
GbA10	52038534	52037183
GbA10	52328697	52330057
GbA10	52342413	52343584
GbA10	53250677	53249323
GbA10	53804901	53806264
GbA10	54798090	54799261
GbA10	54805223	54806553
GbA10	56767575	56768915
GbA10	56800391	56799036
GbA10	58204489	58205769
GbA10	61388277	61389625
GbA10	62262997	62261644
GbA10	63048154	63046864
GbA10	63342017	63340663
GbA10	65332363	65331007
GbA10	65351668	65350311
GbA10	65410949	65409603
GbA10	66252713	66254022
GbA10	72213343	72214708
GbA10	72225554	72226920
GbA10	72725290	72724079
GbA10	73195760	73197117
GbA10	73859698	73858347
GbA10	73871952	73870598
GbA10	75375568	75374219
GbA10	75647955	75649188
GbA10	80276390	80277704
GbA10	80278635	80279980
GbA10	80285369	80286714
GbA10	80404592	80405938
GbA10	80762618	80763968
GbA10	83166675	83165329
GbA10	84153897	84152532
GbA10	85125429	85126782
GbA10	86583250	86584560
GbA10	87093898	87092542
GbA10	87188712	87189929
GbA10	91043145	91044440
GbA10	91061991	91063355
GbA10	94316420	94317785
GbA10	98509025	98510343
GbA10	99481836	99480480
GbA10	99676295	99674950
GbA10	99788967	99787613
GbA10	99800382	99799014
GbA11	26981030	26982366
GbA11	27002131	27003373
GbA11	28672624	28671377
GbA11	30997543	30996213
GbA11	31701429	31702780
GbA11	31876008	31874655
GbA11	32736406	32737751
GbA11	32739015	32740360
GbA11	32750515	32751832
GbA11	35001058	35002420
GbA11	35530235	35528902
GbA11	36890175	36891528
GbA11	36905686	36907029
GbA11	39991272	39989898
GbA11	39994784	39993410
GbA11	40104671	40103305
GbA11	52669319	52670687
GbA11	53296717	53297969
GbA11	60032679	60031317
GbA11	60043291	60041987
GbA11	61545851	61547087
GbA11	62247467	62246116
GbA11	66276147	66277500
GbA11	66279696	66281049
GbA11	66425997	66424645
GbA11	66499416	66498052
GbA11	72787470	72786117
GbA11	76896656	76895326
GbA11	77884316	77882962
GbA11	81425745	81427053
GbA11	81529415	81528064
GbA11	81547760	81546418
GbA11	86675243	86676514
GbA12	5917755	5919118
GbA12	6758095	6756874
GbA12	8013049	8011676
GbA12	12064450	12065804
GbA12	13996093	13994743
GbA12	14261902	14263267
GbA12	16221976	16220637
GbA12	20945813	20947090
GbA12	22099802	22098446
GbA12	22556773	22555421
GbA12	23725611	23726976
GbA12	25242192	25240827
GbA12	25250309	25249017
GbA12	25278176	25276828
GbA12	25337243	25335891
GbA12	28718720	28717369
GbA12	29349217	29347848
GbA12	30838139	30839496
GbA12	33223183	33224535
GbA12	33232783	33234132
GbA12	39205254	39203894
GbA12	40725688	40727011
GbA12	42380449	42381807
GbA12	42497655	42498913
GbA12	42506082	42507390
GbA12	42543773	42542418
GbA12	42596683	42595442
GbA12	43754899	43753548
GbA12	45279160	45277807
GbA12	46915894	46917249
GbA12	49215374	49214002
GbA12	51124053	51125404
GbA12	56693094	56691729
GbA12	58289368	58290731
GbA12	58698370	58697018
GbA12	66047702	66046364
GbA12	66052193	66050824
GbA12	66794943	66793589
GbA12	66821404	66822718
GbA12	72805462	72806818
GbA12	74128617	74129908
GbA12	75907472	75906199
GbA12	81433526	81434859
GbA12	84885069	84886283
GbA12	84886441	84887777
GbA12	86027232	86028588
GbA12	86206660	86205417
GbA12	89162842	89161644
GbA13	7639521	7640878
GbA13	7710417	7711781
GbA13	7970814	7969454
GbA13	13088123	13089448
GbA13	16237321	16238668
GbA13	16240075	16241422
GbA13	16257782	16259144
GbA13	16384161	16383005
GbA13	17216492	17215134
GbA13	18539058	18540410
GbA13	21865075	21866296
GbA13	21966050	21967406
GbA13	21969531	21970869
GbA13	22487366	22488663
GbA13	22788851	22787620
GbA13	23105713	23104382
GbA13	26346814	26345496
GbA13	28266995	28268369
GbA13	28291257	28292607
GbA13	29399756	29398404
GbA13	29586162	29584806
GbA13	29591729	29590373
GbA13	29612673	29614037
GbA13	29631924	29633268
GbA13	30786852	30788179
GbA13	34218494	34219821
GbA13	39546405	39545043
GbA13	39551716	39550382
GbA13	41698932	41700286
GbA13	46725791	46727144
GbA13	47788018	47789341
GbA13	48322336	48323623
GbA13	50843049	50844412
GbA13	54115291	54116641
GbA13	54820950	54822297
GbA13	54835151	54836498
GbA13	60134517	60133148
GbA13	63312072	63313424
GbA13	63674714	63676062
GbA13	67590543	67589164
GbA13	67639002	67640320
GbA13	69537221	69538575
GbA13	74018026	74019353
GbA13	74022337	74023664
GbA13	74846819	74845508
GbA13	74885045	74883738
GbA13	75411103	75412451
GbA13	75421129	75422286
GbA13	75424320	75425651
GbD12	28952329	28951115
scaffold10005	104704	106066
scaffold10073_A13	32137	33462
scaffold1011_A05	19636	18266
scaffold10219	1948	3299
scaffold10227	77432	78787
scaffold10227	86012	87363
scaffold10227	137688	138951
scaffold10227	147994	149331
scaffold10359_A04	127088	128271
scaffold10359_A04	191770	190423
scaffold10455_A05	40947	42312
scaffold10523	23972	22602
scaffold10525_A07	66925	65543
scaffold10560	81569	80242
scaffold10560	95716	96969
scaffold10570_A05	28417	27115
scaffold1059_A06	113799	112442
scaffold10654	11287	9908
scaffold10654	23322	21970
scaffold10747_A13	8214	9549
scaffold10747_A13	11782	13153
scaffold10790_A13	17582	18928
scaffold10904_A13	42886	41530
scaffold11101	19567	20932
scaffold1118	86536	85169
scaffold11349_A10	51673	53019
scaffold11349_A10	75713	77074
scaffold11617	165	1484
scaffold1162_A05	199232	200584
scaffold1165_A13	150289	151642
scaffold1165_A13	158481	159834
scaffold11742	370509	371842
scaffold11777_A07	48799	47430
scaffold11810	92280	93641
scaffold12069_A08	122247	123585
scaffold12069_A08	139576	140845
scaffold12157_A08	15422	16740
scaffold12157_A08	31585	32908
scaffold1248_A12	204789	203440
scaffold1284	93242	94486
scaffold12892	9547	8210
scaffold12892	36137	34796
scaffold12978	67540	68893
scaffold1298_A06	305304	303976
scaffold1298_A06	345041	343699
scaffold13325_A08	125582	126922
scaffold13349	136988	135641
scaffold13442	80421	79239
scaffold13442	87719	86354
scaffold13483	13815	15057
scaffold13597_A04	116118	114894
scaffold13604_A12	30957	29638
scaffold13673	33121	34462
scaffold1371_A08	1	1252
scaffold13716	18221	19570
scaffold13716	37071	35717
scaffold13732_A02	15966	17308
scaffold14208	130073	128721
scaffold14294	909	2278
scaffold14531_A07	39668	40873
scaffold14734_A12	42808	41437
scaffold1474_A05	52051	50698
scaffold1483_A05	87911	86541
scaffold1483_A05	206361	204994
scaffold1487	65656	67001
scaffold15164	8988	7622
scaffold1527_A12	99427	100739
scaffold15485	30892	32113
scaffold15674	20840	22189
scaffold15719	323	1532
scaffold1700	33774	32426
scaffold1716_A13	106241	104876
scaffold1722_A12	235935	237229
scaffold1723_A13	225296	226636
scaffold17470_A08	23428	24770
scaffold17484_A04	84558	83204
scaffold17580_A08	49261	47921
scaffold18063	16455	15099
scaffold18067_A12	29745	28380
scaffold18102_A04	39111	40480
scaffold1854_A13	26738	28091
scaffold1854_A13	62654	64020
scaffold1884_A06	292214	293541
scaffold18878_A13	11394	10089
scaffold18878_A13	23980	22627
scaffold1897	11373	12742
scaffold1899_A05	89924	88568
scaffold1899_A05	95021	93669
scaffold1899_A05	111326	109972
scaffold19001	31424	30114
scaffold19133_A03	54454	53140
scaffold19599_A12	39825	38469
scaffold202_A13	141856	143219
scaffold2078_A08	196134	194794
scaffold2095_A11	112353	113528
scaffold2098_A13	113308	111954
scaffold21078_A08	6437	5104
scaffold21078_A08	19792	18486
scaffold212	12155	13512
scaffold212	150085	151436
scaffold21254_A05	17425	16076
scaffold21541	53762	55110
scaffold2212_A06	2706	1343
scaffold2212_A06	29238	30594
scaffold2212_A06	68923	70232
scaffold2212_A06	77549	78908
scaffold2217_A13	41164	42516
scaffold2238	65757	66972
scaffold2238	93069	94336
scaffold22394_A08	1848	668
scaffold2250_A06	18008	19361
scaffold2252_A12	69310	68138
scaffold2312_A02	166887	168200
scaffold2317_A12	142	1480
scaffold2319_A10	120222	121570
scaffold2331	176469	175238
scaffold2369_A08	366347	367548
scaffold2449	270482	271837
scaffold2486	4051	2694
scaffold2486	12282	10914
scaffold25047_A11	19067	17716
scaffold2513	240293	241645
scaffold25278	44317	45590
scaffold25392_A11	32782	34148
scaffold2562_A05	103391	104730
scaffold2562_A05	113427	114782
scaffold2563_A10	85468	84101
scaffold2565_A12	79504	80871
scaffold2575	206441	207793
scaffold2586	316083	314737
scaffold2600_A02	151509	150162
scaffold2619_A07	21302	22667
scaffold26344	8001	9348
scaffold2662_A12	19640	20994
scaffold26745_A11	13607	12244
scaffold268_A12	205359	206696
scaffold2680_A02	127231	126006
scaffold2680_A02	141587	142824
scaffold2680_A02	328403	327081
scaffold2682	44064	45393
scaffold2682	287728	289051
scaffold2698_A08	249717	248405
scaffold2703_A13	132375	133694
scaffold2703_A13	141992	143350
scaffold2719_A13	84516	85836
scaffold2727_A11	14415	15783
scaffold2727_A11	40785	42044
scaffold274_A12	388716	387478
scaffold2856_A03	52064	53420
scaffold2856_A03	61181	62551
scaffold2856_A03	155628	154268
scaffold2856_A03	185605	184382
scaffold2866	59066	57775
scaffold2871_A06	146607	145284
scaffold2905	64259	62884
scaffold291_A05	150210	148864
scaffold296_A12	145347	146679
scaffold2983_A01	22124	23482
scaffold2983_A01	36364	37734
scaffold3026_A04	223209	224559
scaffold30702	337	1689
scaffold3098_A02	137517	136175
scaffold3136_A06	15457	14114
scaffold3136_A06	37722	36549
scaffold3163_A05	15707	14335
scaffold3163_A05	32078	33444
scaffold3163_A05	38016	39382
scaffold3163_A05	41175	42541
scaffold3185_A04	165565	166792
scaffold3192_A10	211899	213251
scaffold3192_A10	236033	237291
scaffold3226_A04	77117	75760
scaffold3276	195793	197145
scaffold328_A11	58584	59935
scaffold32915	12809	11529
scaffold3359_A11	206443	205087
scaffold343_A05	210505	211874
scaffold343_A05	218693	217340
scaffold34469_A11	24653	26008
scaffold3522_A07	225302	224098
scaffold3589_A10	44909	43533
scaffold3646_A13	8147	9515
scaffold377_A06	246368	247726
scaffold3806_A07	217722	218929
scaffold3848_A12	145734	147059
scaffold3848_A12	242890	241544
scaffold391_A06	142325	143677
scaffold41128	2780	1466
scaffold4122	101620	102970
scaffold4122	124936	126192
scaffold4171_A03	32003	33321
scaffold4171_A03	103387	104737
scaffold42107	255	1609
scaffold4227	20851	19499
scaffold4227	26723	25371
scaffold4227	155405	154055
scaffold4232_A04	93293	91942
scaffold4232_A04	97411	96060
scaffold4232_A04	137822	136454
scaffold42510	4154	2866
scaffold4270_A04	78271	79538
scaffold4285	224003	222649
scaffold4303_A13	33532	34822
scaffold431_A08	31992	30741
scaffold4316_A11	161151	162488
scaffold4316_A11	175937	177290
scaffold4354	36280	34924
scaffold4373_A07	65879	67225
scaffold4404_A13	266667	265314
scaffold4414_A10	339419	340771
scaffold4414_A10	372504	371169
scaffold4414_A10	390438	389104
scaffold4414_A10	396721	395548
scaffold4431	38103	39455
scaffold4431	52117	53487
scaffold4442_A11	181121	182483
scaffold445	111241	112618
scaffold4465	11396	12733
scaffold4468_A13	4815	6150
scaffold4468_A13	38862	40189
scaffold4468_A13	45806	44470
scaffold4492_A12	166172	167345
scaffold4492_A12	171510	172851
scaffold4534_A06	87696	86333
scaffold4534_A06	100940	99664
scaffold4586_A08	23467	22140
scaffold4624_A02	14668	16034
scaffold46591	14320	12977
scaffold4674_A05	130594	129245
scaffold4674_A05	138901	137540
scaffold4721_A02	85597	86942
scaffold4733	309526	310879
scaffold4807	17680	16315
scaffold48283	4664	3312
scaffold48448	1972	3254
scaffold499_A13	52670	51316
scaffold499_A13	74798	73431
scaffold499_A13	136699	135387
scaffold5018	380490	379148
scaffold5018	461569	462931
scaffold5018	470554	471902
scaffold5023_A02	6415	5064
scaffold50522	3516	2226
scaffold50817	1	1206
scaffold5187_A08	5716	4368
scaffold5251	87608	88970
scaffold5300	290588	289235
scaffold531	25057	26404
scaffold5310_A10	69534	68199
scaffold5405_A07	16578	17934
scaffold5405_A07	31377	32730
scaffold5414_A01	60930	59720
scaffold5414_A01	63578	62368
scaffold5414_A01	74335	72987
scaffold5488_A04	27920	29275
scaffold5491_A01	92886	91588
scaffold5520_A02	573949	572597
scaffold5672	31840	30489
scaffold5701_A07	6817	8064
scaffold5765_A02	21554	20209
scaffold5838_A03	66576	65202
scaffold5878_A11	36926	38275
scaffold5878_A11	40707	42056
scaffold5878_A11	91503	90155
scaffold5884	25806	24503
scaffold590	138209	139589
scaffold5935_A02	219074	217707
scaffold5944_A07	54893	53542
scaffold6057_A08	6589	7943
scaffold6165_A11	24397	25572
scaffold6165_A11	108752	107399
scaffold6165_A11	119446	118117
scaffold6197_A13	101688	100325
scaffold6197_A13	252051	253411
scaffold6313_A11	14879	16071
scaffold6358	161120	159751
scaffold6434_A03	133518	134842
scaffold6434_A03	138220	136854
scaffold6434_A03	167228	165878
scaffold6446_A03	204150	202805
scaffold6509_A06	35097	33742
scaffold6509_A06	291542	290193
scaffold6532_A13	434423	433064
scaffold6586_A06	37541	38906
scaffold66_A06	24334	25693
scaffold66_A06	38390	39587
scaffold664_A11	51527	50174
scaffold6644_A08	12799	14152
scaffold6650	62789	64116
scaffold6689_A13	86406	87772
scaffold6695	54864	53563
scaffold6695	113085	114444
scaffold6695	123893	125161
scaffold671_A05	392398	391057
scaffold671_A05	543070	541702
scaffold6777	25656	24311
scaffold687	42431	43785
scaffold6968_A01	89183	87818
scaffold6968_A01	91991	90745
scaffold717_A06	50989	52203
scaffold717_A06	52204	53429
scaffold7192	115536	114186
scaffold7192	135175	133824
scaffold720_A02	56017	57372
scaffold7202_A09	208712	207503
scaffold7202_A09	210244	208850
scaffold7252_A06	167597	168961
scaffold7372_A11	131545	130194
scaffold7372_A11	430476	429217
scaffold755_A08	349610	348243
scaffold7634_A03	111552	110185
scaffold7634_A03	113099	111857
scaffold7659_A02	493251	491898
scaffold7705_A07	77987	76838
scaffold7804_A08	134414	135763
scaffold7804_A08	201205	202552
scaffold7812_A04	259779	258423
scaffold7831_A11	207286	208655
scaffold7836_A03	113240	114396
scaffold7868	141510	142878
scaffold7871	87745	86436
scaffold794_A11	90351	88991
scaffold7961_A11	105292	106612
scaffold7961_A11	195275	193919
scaffold7968_A07	48363	47087
scaffold7968_A07	56447	55092
scaffold7968_A07	63838	65185
scaffold7968_A07	69776	71123
scaffold801_A12	38001	36641
scaffold801_A12	99344	98159
scaffold8046	65666	64303
scaffold8073_A11	52828	51501
scaffold813_A06	46423	45115
scaffold8218_A13	19271	18074
scaffold8218_A13	28347	27016
scaffold8423_A08	53180	51827
scaffold8610_A07	198071	199293
scaffold8671	178998	177645
scaffold8818_A03	2773	4130
scaffold8818_A03	4405	5761
scaffold8932	75933	74584
scaffold8938	2522	3882
scaffold9006	63383	64668
scaffold9057_A06	89206	90560
scaffold9078_A03	9135	7784
scaffold9078_A03	55984	57345
scaffold9140_A04	71714	72949
scaffold9242_A11	15447	14270
scaffold9249_A04	59816	58462
scaffold9249_A04	64117	62763
scaffold9263_A04	112371	111057
scaffold9263_A04	153516	152280
scaffold9266_A03	74564	75919
scaffold9266_A03	79540	80801
scaffold9429_A08	1	1307
scaffold9465_A03	162956	164279
scaffold951_A08	102832	101488
scaffold952	566973	568244
scaffold952	570414	571672
scaffold952	580675	582019
scaffold9671	29005	30364
scaffold970_A05	2414	1060
scaffold970_A05	10985	9616
scaffold9881	269111	267755
scaffold989	69205	70481
scaffold9899_A06	8041	9240
